# Supplementary material for: Synthesis, reactivity and catalytic activity of Au-PAd3 complexes
Source: Royal Society of Chemistry journal article supplement (doi:10.1039/d0dt03330h), 2020-01-01
Supplement: d0dt03330h1.pdf [file d0dt03330h1.pdf]

Supporting Information  
for

**Synthesis, reactivity and catalytic activity of Au-PAd<sub>3</sub> complexes**

Vladislav A. Voloshkin,<sup>a</sup> Marina Saab,<sup>a</sup> Kristof Van Hecke,<sup>a</sup> Sii Hong Lau,<sup>b</sup> Bradley P. Carrow,<sup>b</sup>  
and Steven P. Nolan <sup>\*a</sup>

<sup>a</sup> Department of Chemistry and Centre for Sustainable Chemistry, Ghent University  
Krijgslaan 281, S-3, 9000 Ghent, Belgium

<sup>b</sup> Department of Chemistry, Princeton University Princeton, NJ 08544 USA

\*E- mail: Steven.Nolan@ugent.be

**Table of Contents**

|                 |     |
|-----------------|-----|
| Catalytic tests | S2  |
| NMR spectra     | S4  |
| References      | S54 |

## Catalytic tests

### Hydration of 3-hexyne

[Au(PAd<sub>3</sub>)X], 3-hexyne (199 μL, 1.75 mmol), H<sub>2</sub>O (34.6 μL, 1.925 mmol) and NBu<sub>4</sub>OTf (34.3 mg, 0.0875 mmol) were mixed in a 2 mL glass screw-top vial. Reaction mixture was stirred (rpm 1500) at 30°C. The progress of the reaction was monitored by <sup>1</sup>H NMR. The conversion was calculated from the integral intensities of the -CH<sub>2</sub>- protons. The reported values are the average of two runs. NMR shifts of the product corresponded the reported values<sup>1</sup>

**Table S1.** Gold-catalysed hydration of alkynes

$$\text{Et}-\text{C}\equiv\text{C}-\text{Et} + \text{H}_2\text{O} \xrightarrow[\text{30}^\circ\text{C, neat}]{\text{[Au] (X\%)} \text{ NBu}_4\text{OTf (5\%)}} \text{Et}-\text{CH}_2-\text{C}(=\text{O})-\text{Et}$$

| Entry | Catalyst                                                   | mol % of the catalyst | Conv. % (time)          |
|-------|------------------------------------------------------------|-----------------------|-------------------------|
| 1     | [Au(PAd <sub>3</sub> )OTf]                                 | 0.05                  | <5 (24h)                |
| 2     | [Au(PAd <sub>3</sub> )OTf]                                 | 0.1                   | <5 (24h) <sup>[a]</sup> |
| 3     | [Au(PAd <sub>3</sub> )OTf]                                 | 0.25                  | <5 (24h)                |
| 4     | [Au(PAd <sub>3</sub> )NTf <sub>2</sub> ]                   | 0.1                   | <5 (24h)                |
| 5     | [Au(PAd <sub>3</sub> )(CH <sub>3</sub> CN)]BF <sub>4</sub> | 0.1                   | <5 (24h)                |

<sup>[a]</sup> Reaction was also performed at 60 °C with no difference in conversion

### Hydration of diphenylacetylene

[Au(PAd<sub>3</sub>)X], diphenylacetylene (312 mg, 1.75 mmol), H<sub>2</sub>O (34.6 μL, 1.925 mmol) and NBu<sub>4</sub>OTf (34.3 mg, 0.0875 mmol) were mixed in a 4 mL glass screw-top vial. Reaction mixture was stirred (rpm 1500) at 120°C. The progress of the reaction was monitored by <sup>1</sup>H NMR. The conversion was calculated from the integral intensities of suitable aromatic protons.

<sup>1</sup>H NMR (300 MHz, CDCl<sub>3</sub>) δ 8.05 – 7.98 (m, 2H, CH<sub>Ar</sub>), 7.60 – 7.52 (m, 1H, CH<sub>Ar</sub>), 7.50 – 7.42 (m, 2H, CH<sub>Ar</sub>), 7.38 – 7.21 (m, 5H, CH<sub>Ar</sub>), 4.29 (s, 2H, CHCO).

NMR shifts of the product corresponded the reported values<sup>1</sup>

**Table S2.** Gold-catalysed hydration of diphenylacetylene

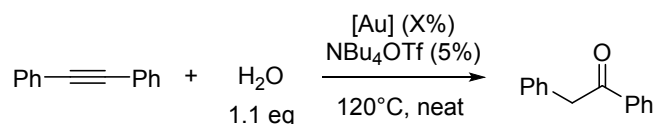

| Entry    | Catalyst                                 | mol % of the catalyst | Conv. % (time)                 |
|----------|------------------------------------------|-----------------------|--------------------------------|
| <b>1</b> | [Au(PAd <sub>3</sub> )OTf]               | <b>0.05</b>           | 29 (15h)                       |
| <b>2</b> | [Au(PAd <sub>3</sub> )OTf]               | <b>0.1</b>            | 62 (4h)<br>78 (8h)<br>88 (15h) |
| <b>3</b> | [Au(PAd <sub>3</sub> )OTf]               | <b>0.2</b>            | 90 (4h)<br>96 (8h)<br>96 (15h) |
| <b>4</b> | [Au(PAd <sub>3</sub> )NTf <sub>2</sub> ] | <b>0.1</b>            | 80 (4h)<br>91 (8h)<br>95 (15h) |
| <b>5</b> | [Au(PAd <sub>3</sub> )NTf <sub>2</sub> ] | <b>0.2</b>            | 94 (4h)<br>96 (8h)<br>96 (15h) |
| <b>6</b> | [Au(JohnPhos)OTf]                        | <b>0.2</b>            | 86 (4h)<br>91 (8h)             |
| <b>7</b> | -                                        | -                     | 0 (8h)                         |

The reported values are the average of two runs.

<sup>1</sup>H NMR spectrum of solid obtained with **Procedure A** for complex **1**

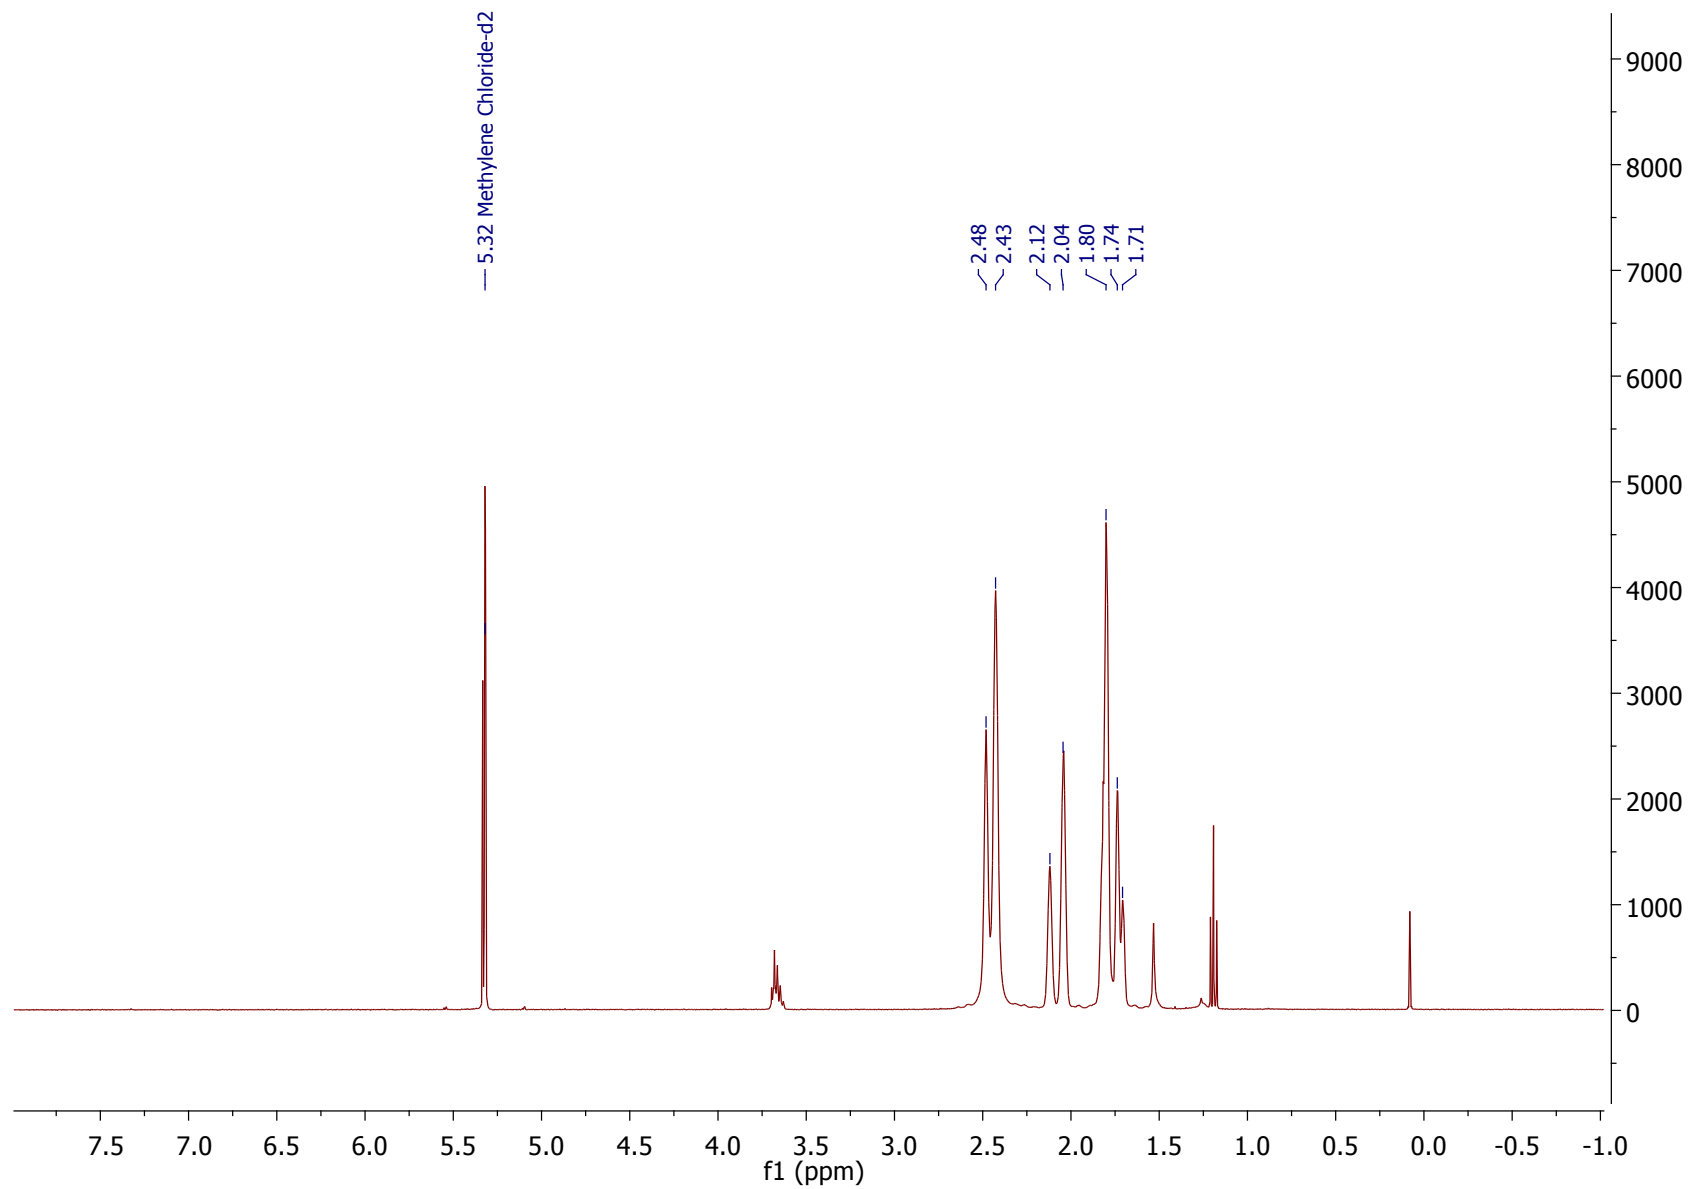

$^{31}\text{P}$  NMR spectrum of solid obtained with **Procedure A** for complex **1**

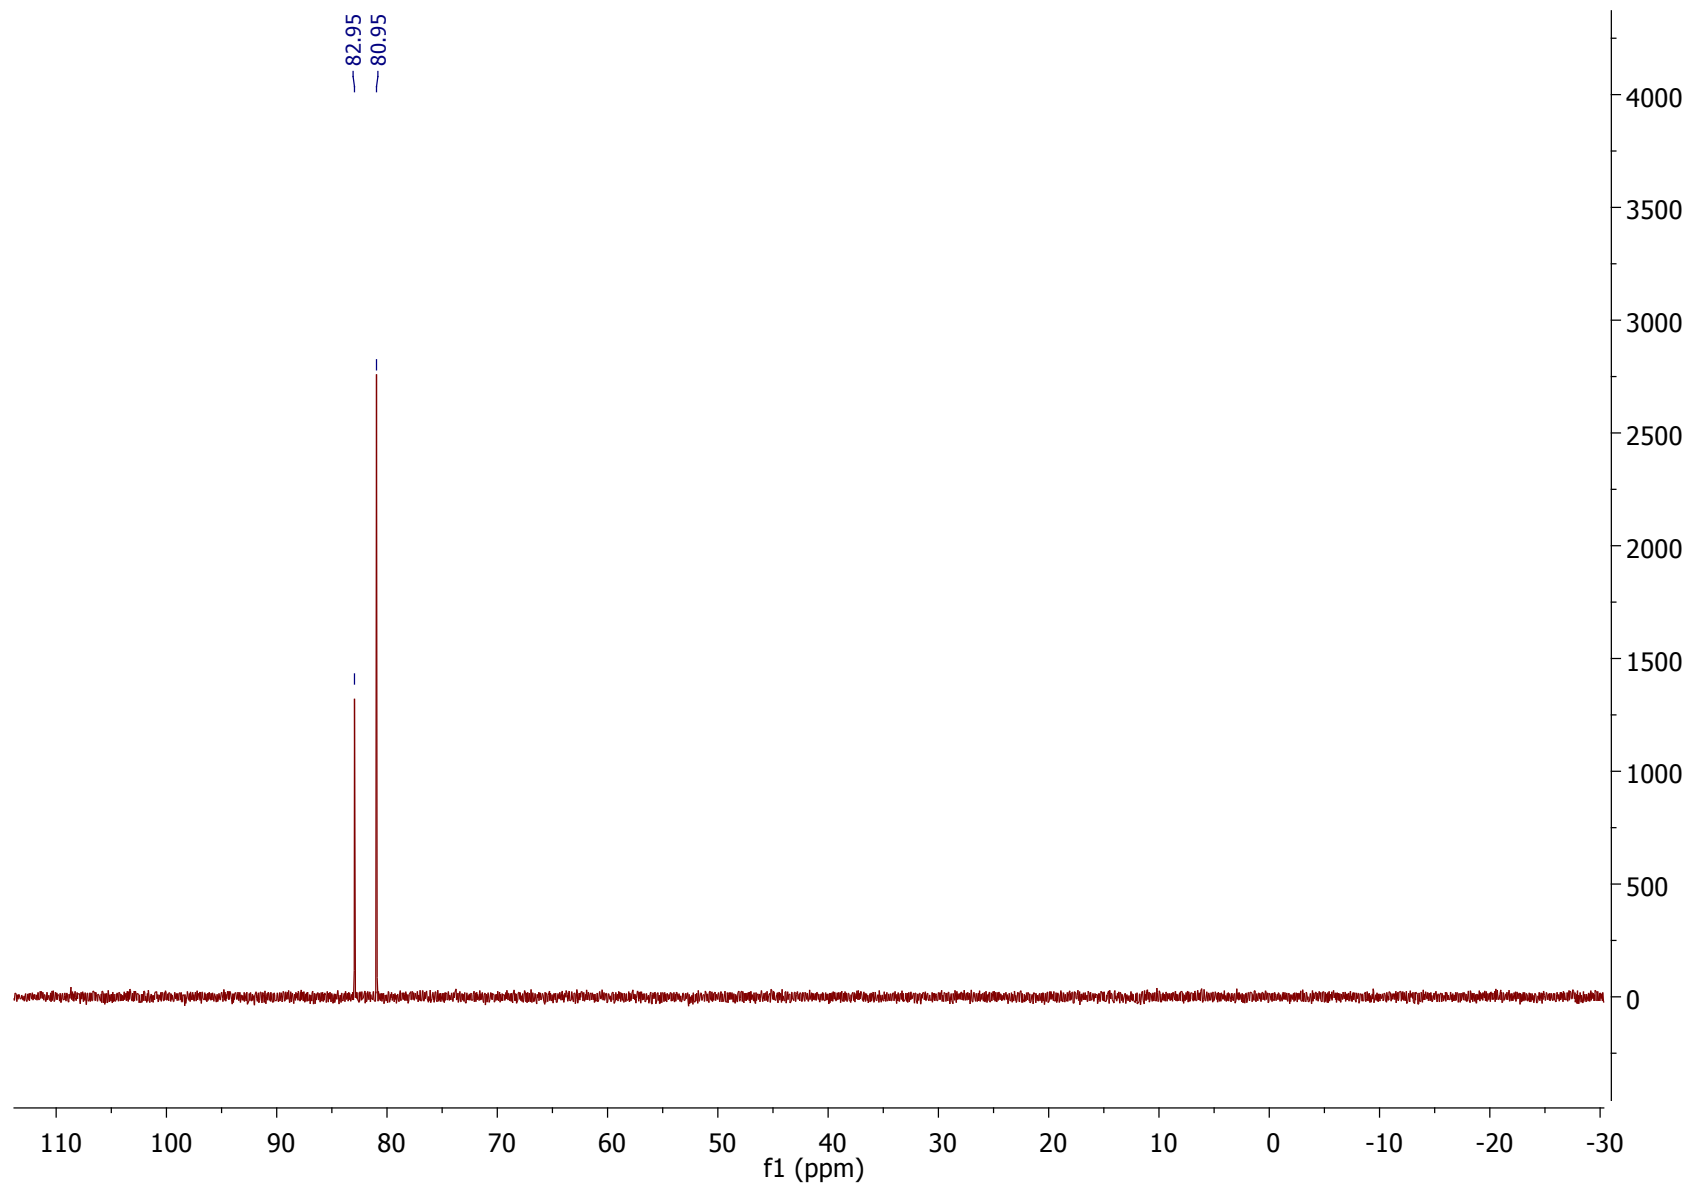

[Au(PAd<sub>3</sub>)Cl] (**1**) <sup>1</sup>H NMR spectrum

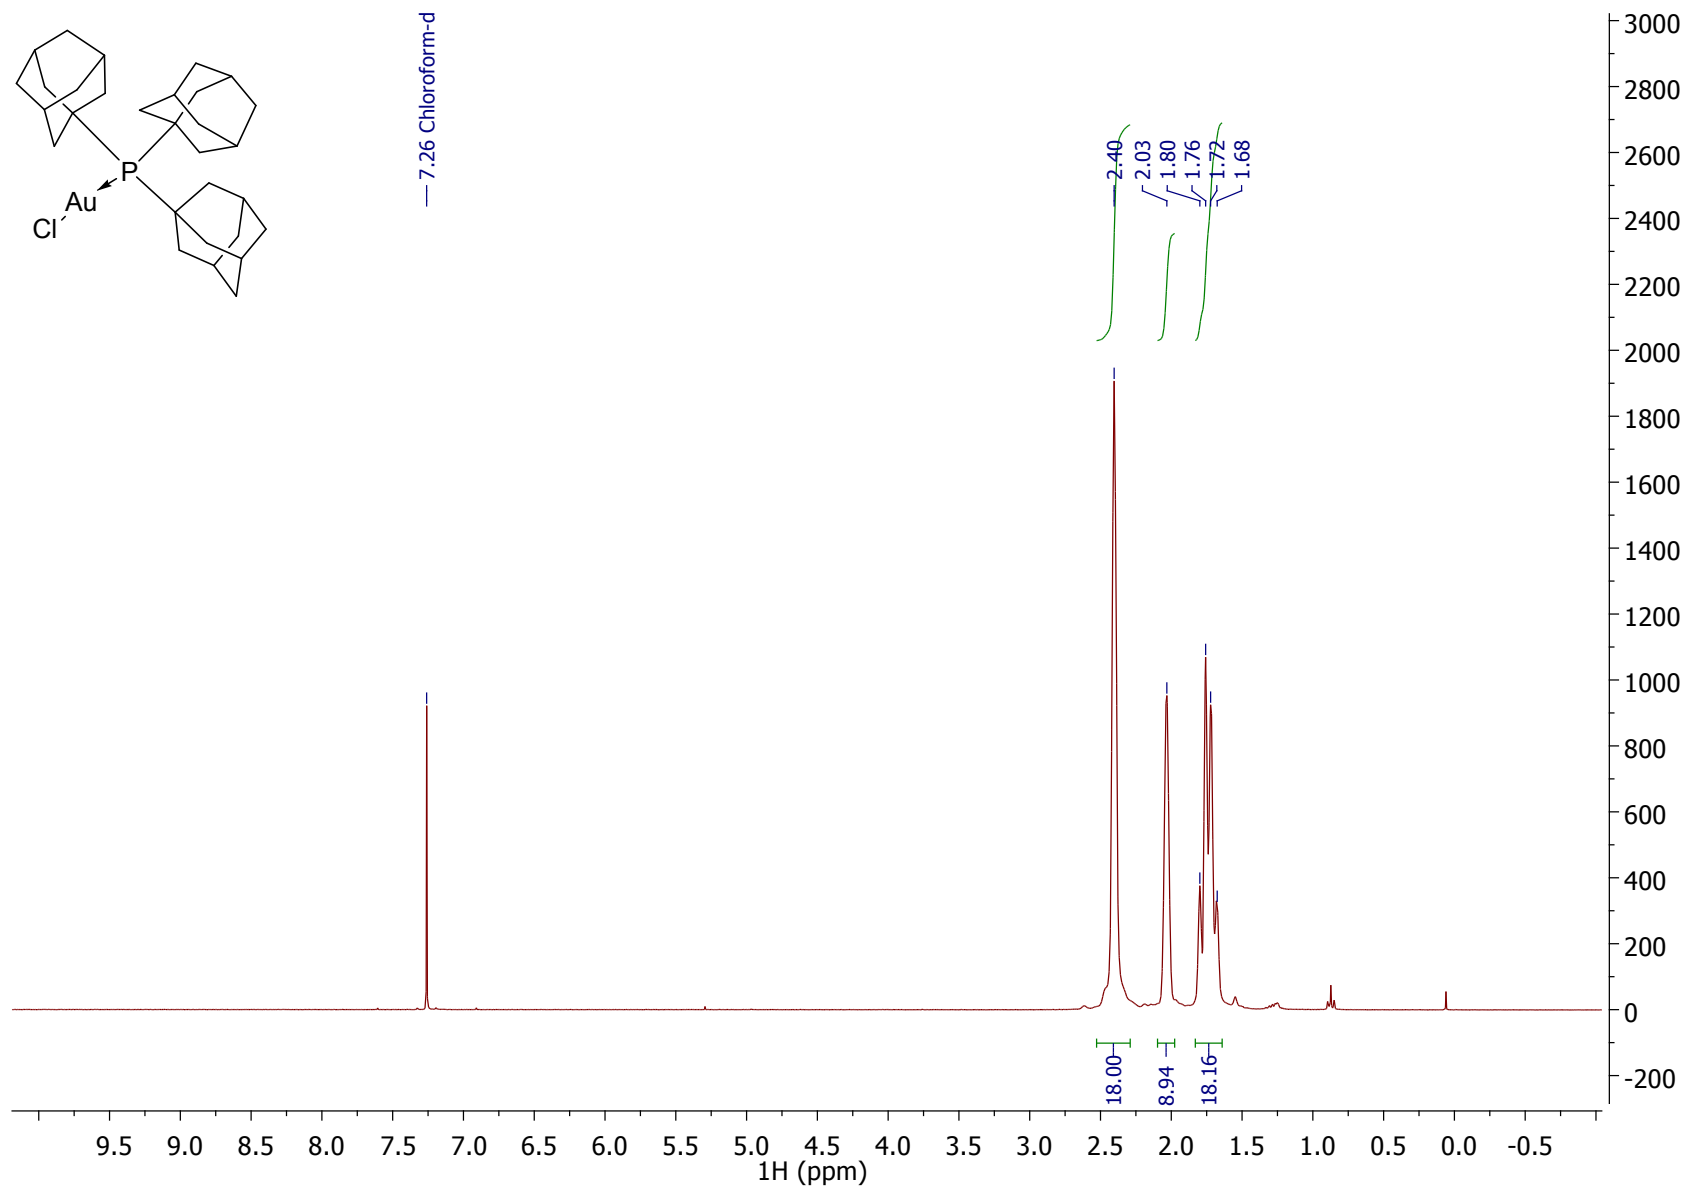

[Au(PAd<sub>3</sub>)Cl] (**1**) <sup>31</sup>P NMR spectrum

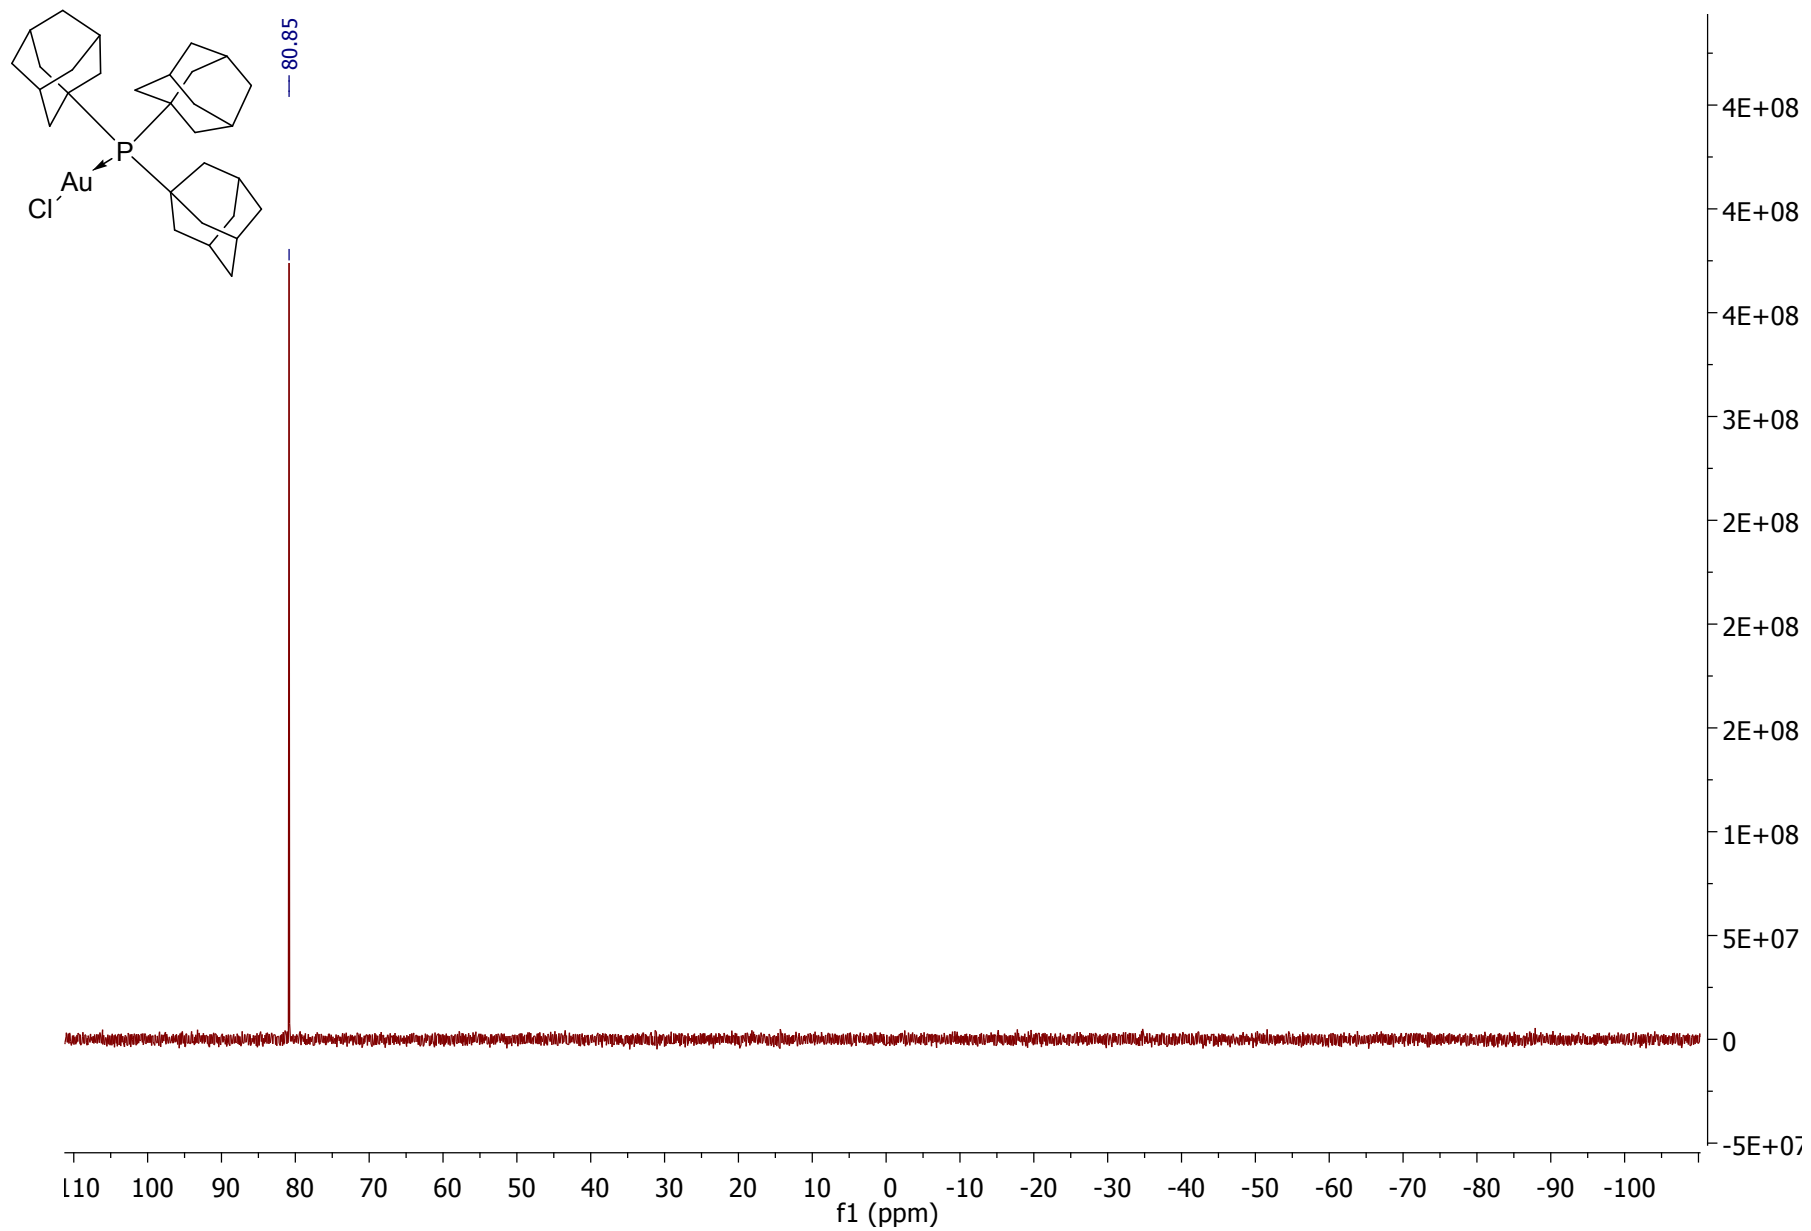

[Au(PAd<sub>3</sub>)<sub>2</sub>]Cl (**2**) <sup>1</sup>H NMR spectrum

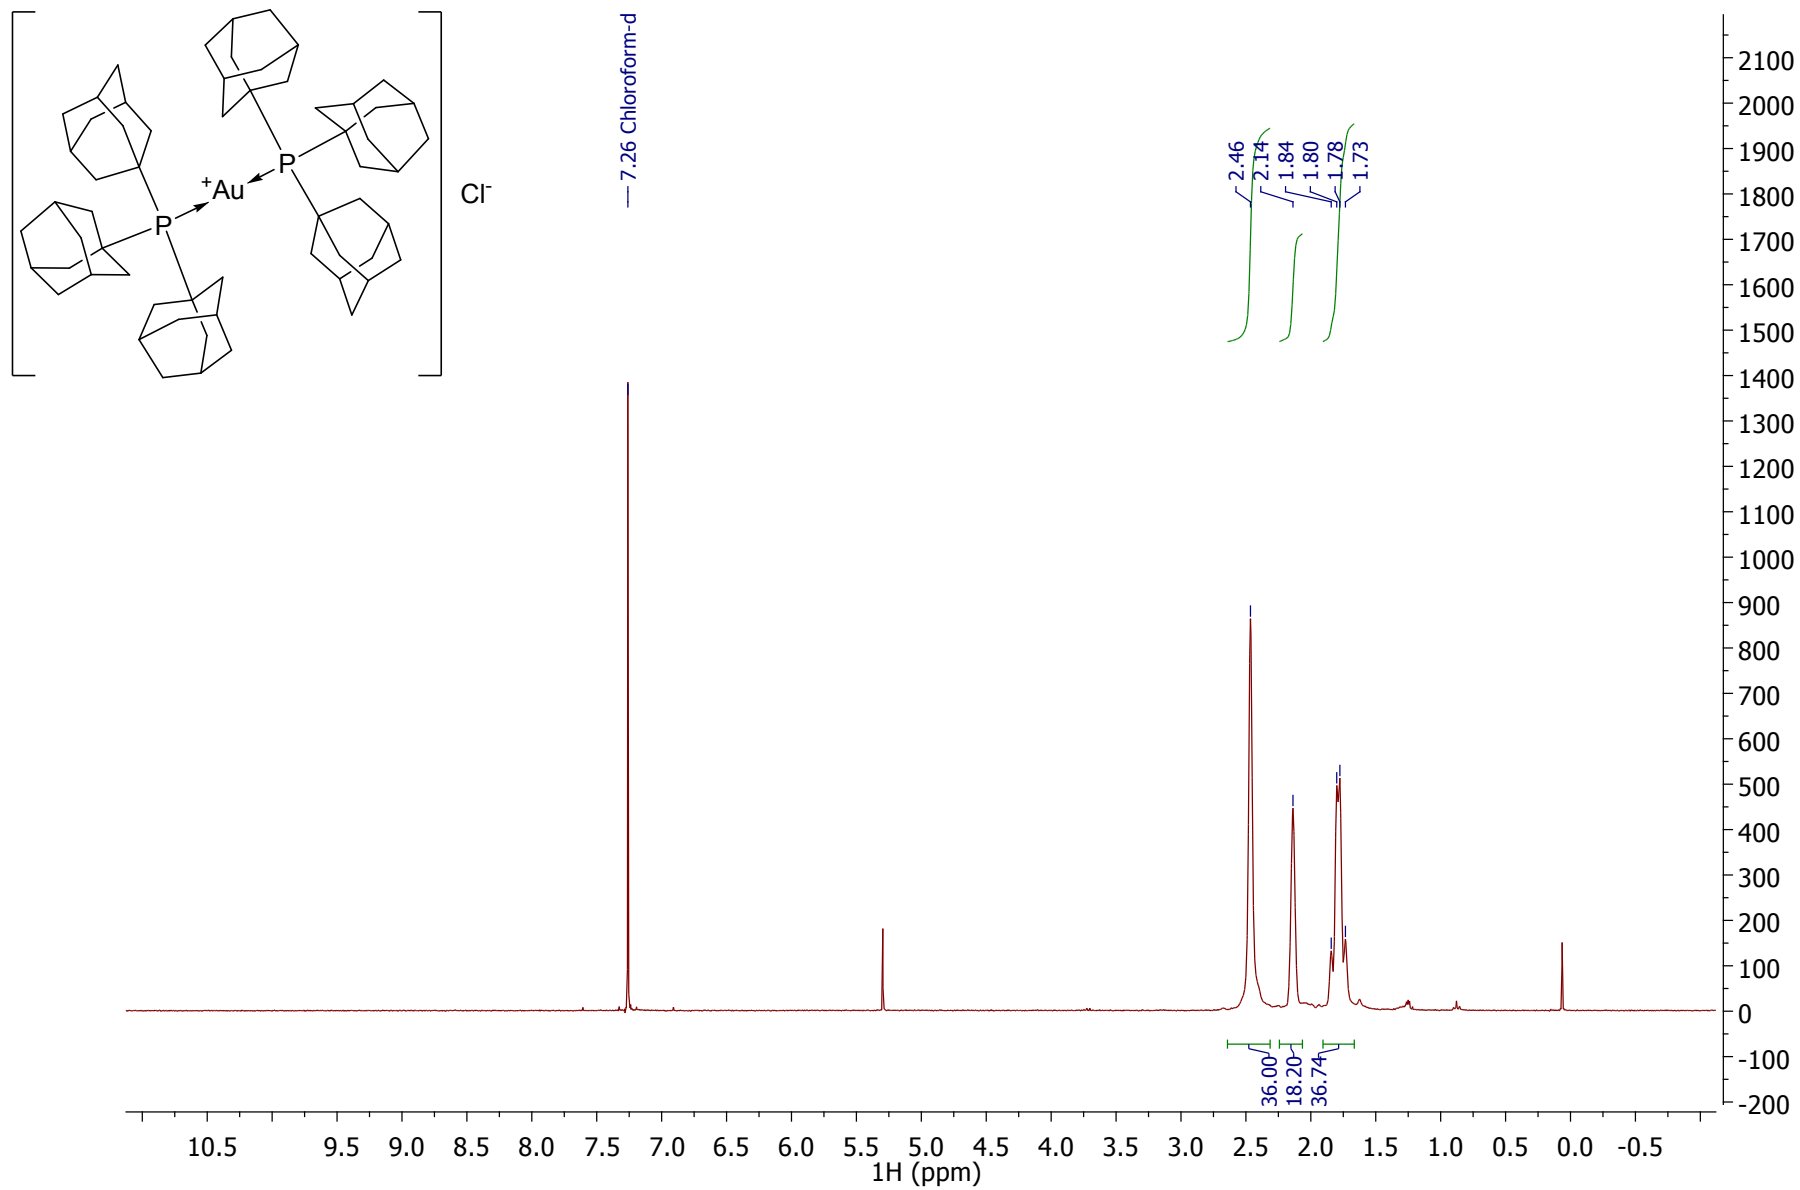



[Au(PAd<sub>3</sub>)<sub>2</sub>]Cl (**2**) <sup>13</sup>C APT NMR spectrum

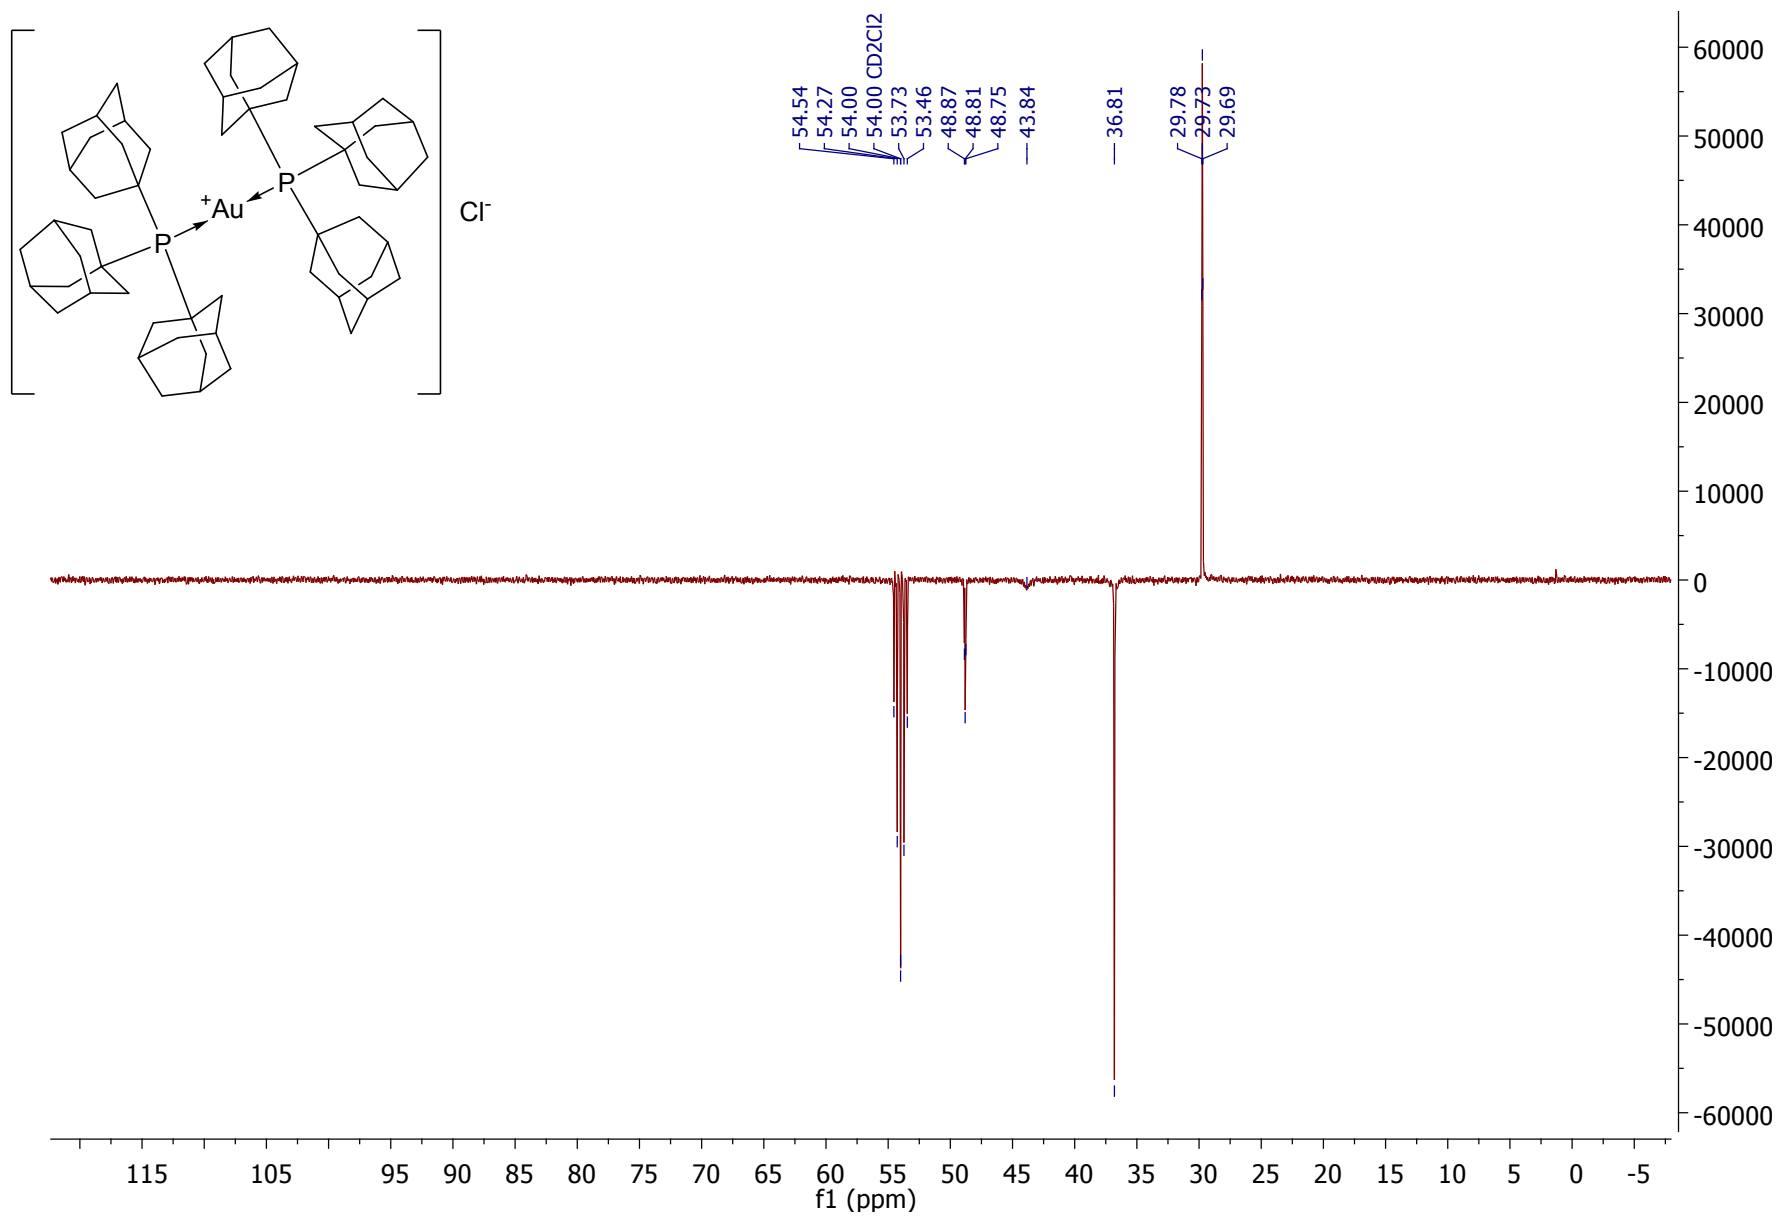

[Au(PAd<sub>3</sub>)<sub>2</sub>]Cl (**2**) <sup>31</sup>P NMR spectrum

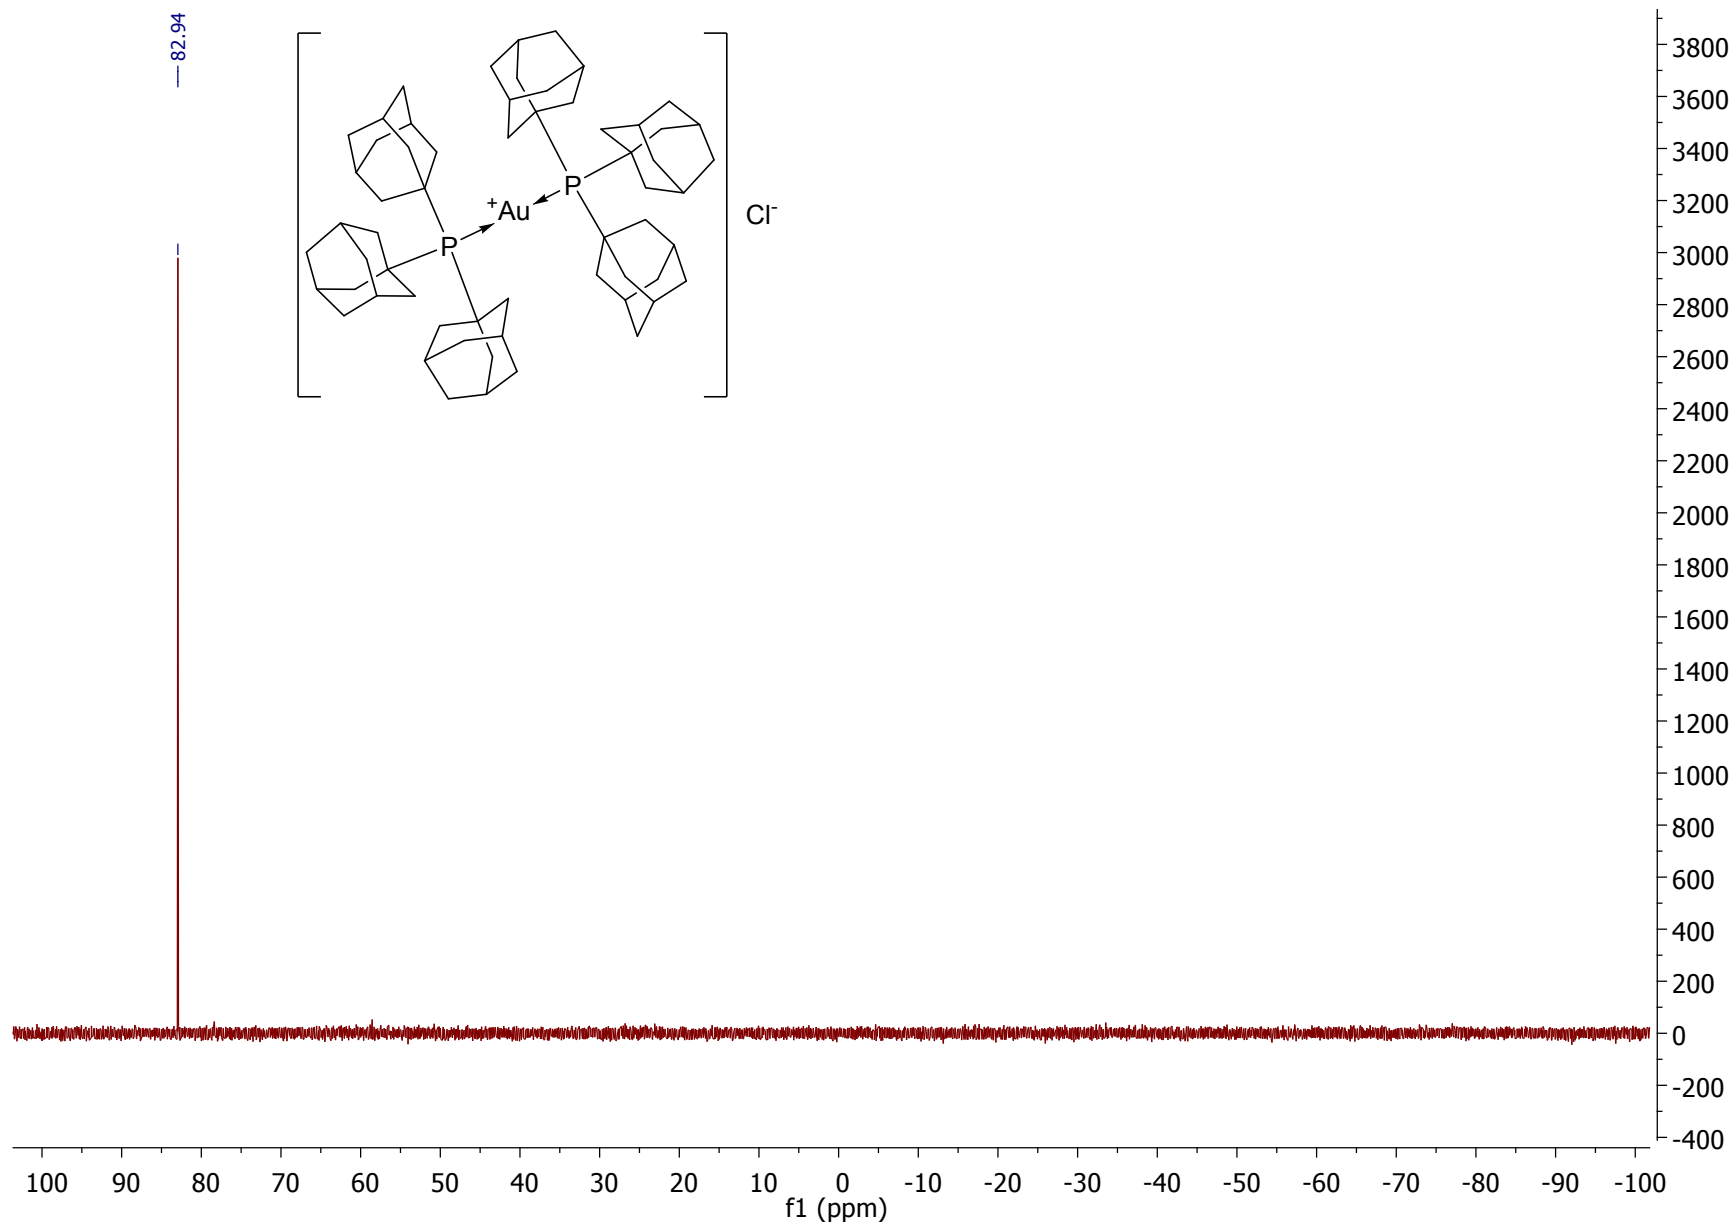

[Au(PAd<sub>3</sub>)<sub>2</sub>]BF<sub>4</sub> (**3**) <sup>1</sup>H NMR spectrum

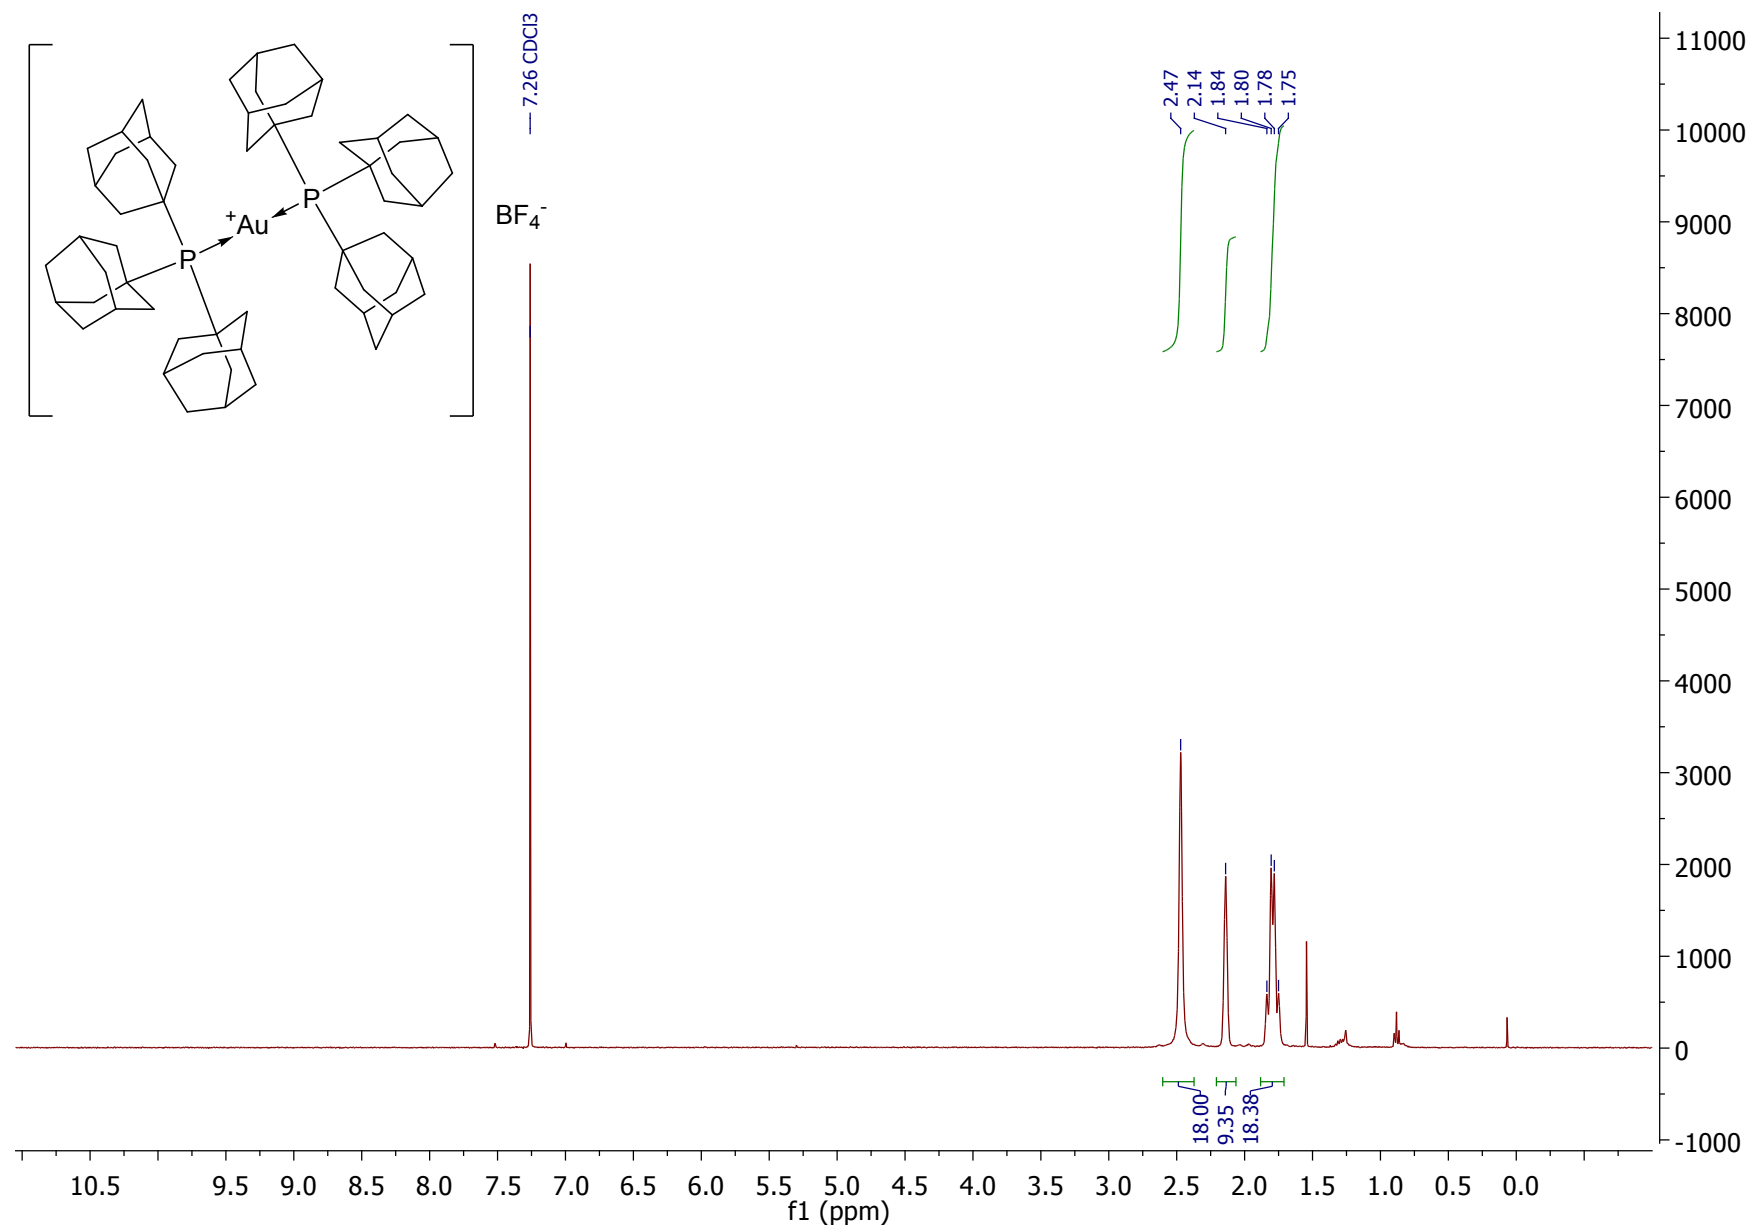

[Au(PAd<sub>3</sub>)<sub>2</sub>]BF<sub>4</sub> (**3**) <sup>13</sup>C NMR spectrum

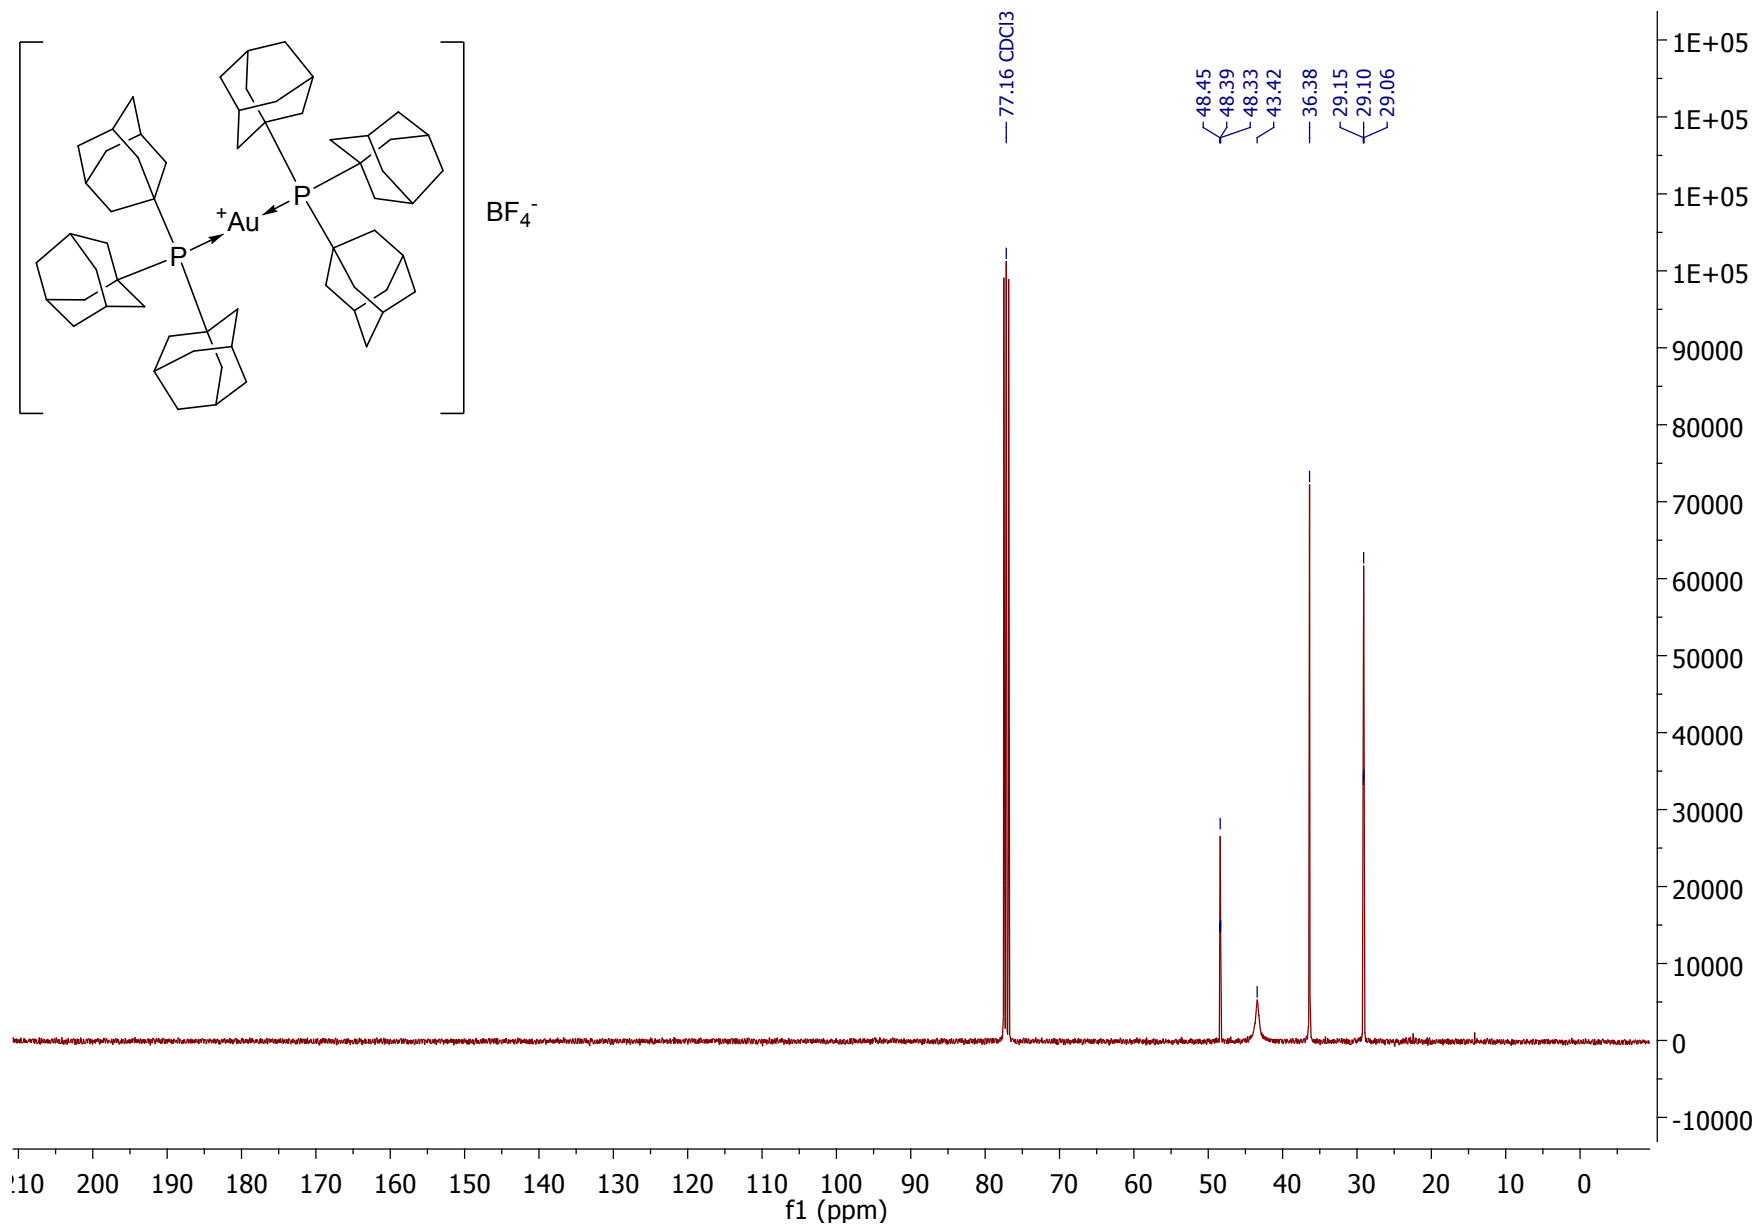

[Au(PAd<sub>3</sub>)<sub>2</sub>]BF<sub>4</sub> (**3**) <sup>31</sup>P NMR spectrum

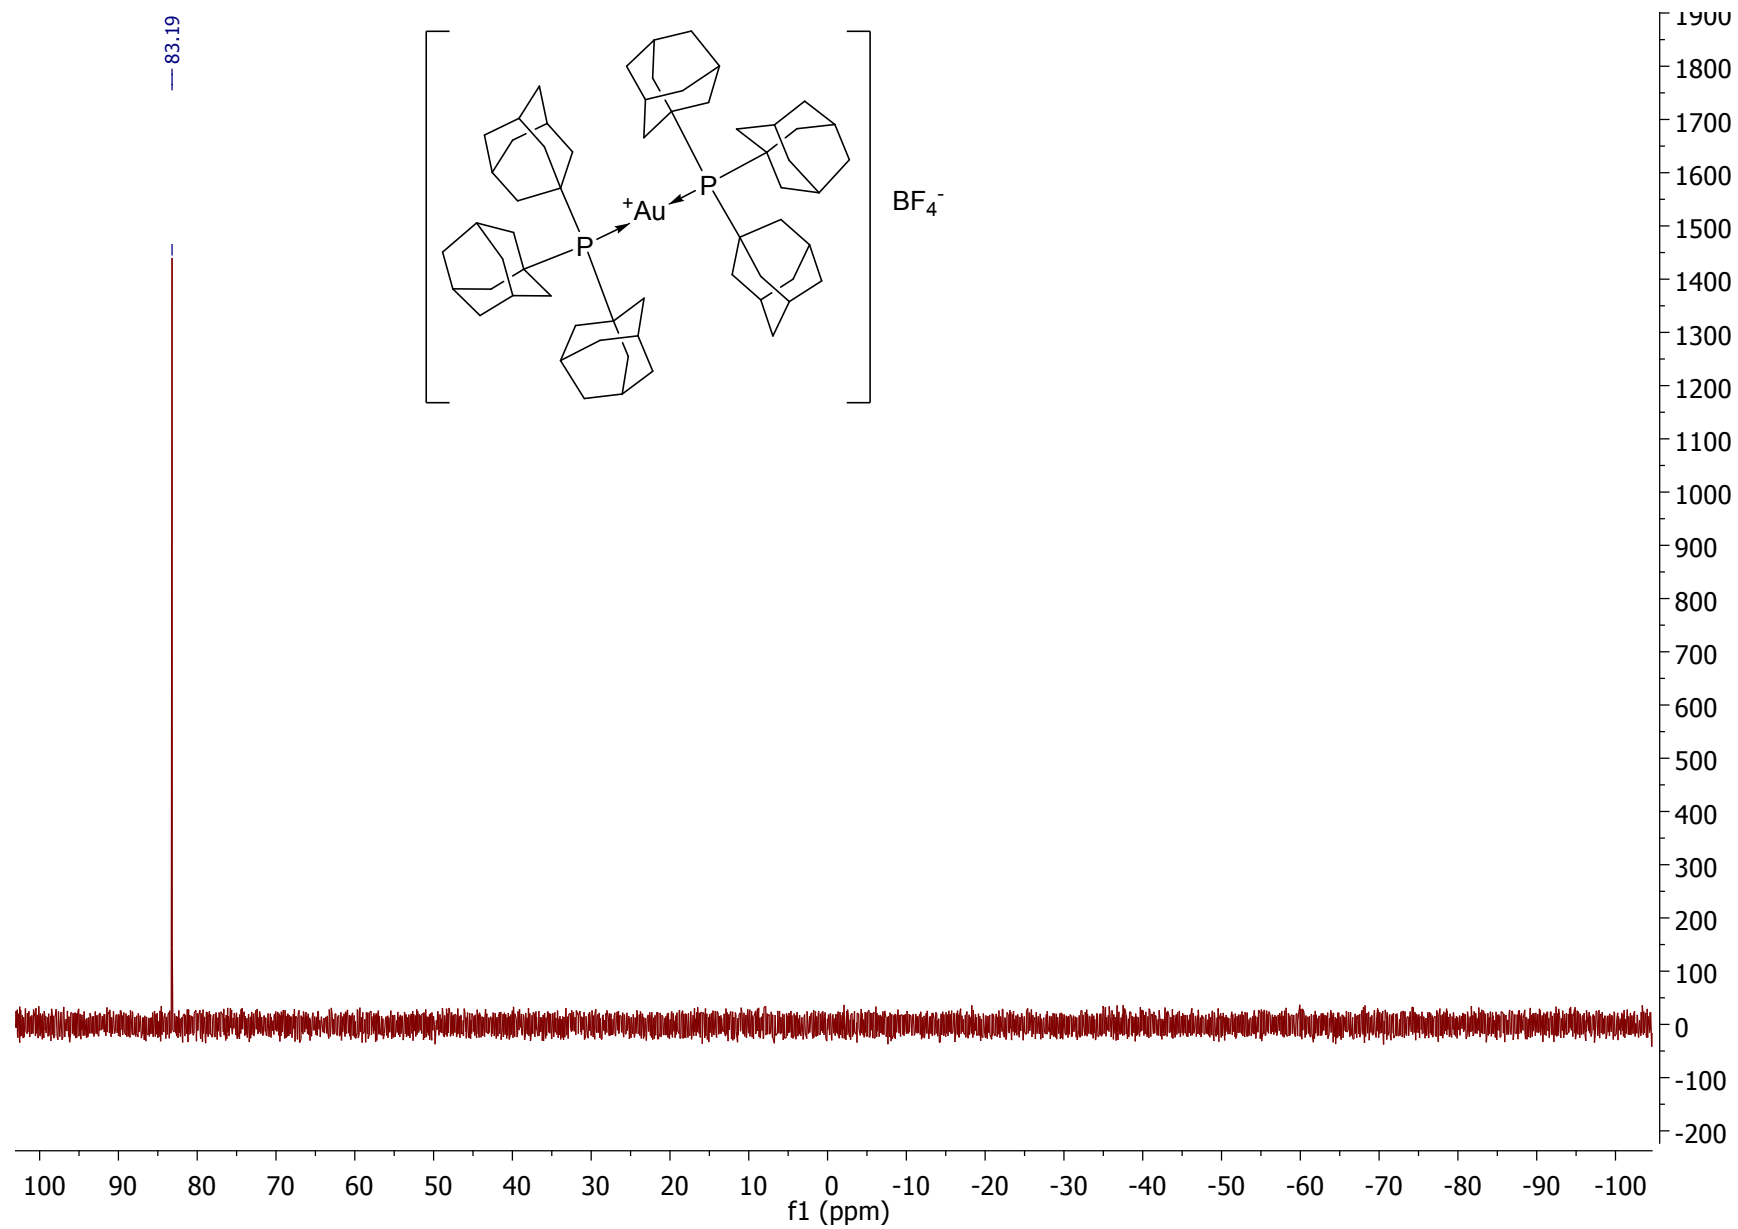

[Au(PAd<sub>3</sub>)<sub>2</sub>]BF<sub>4</sub> (**3**) <sup>19</sup>F NMR spectrum

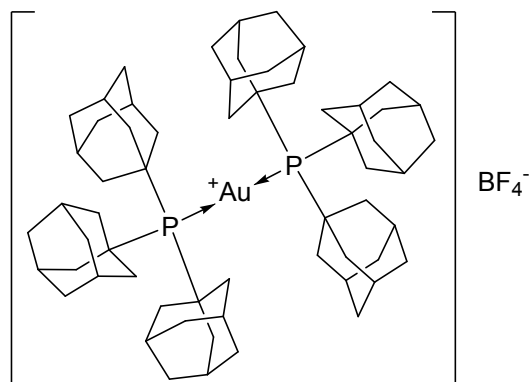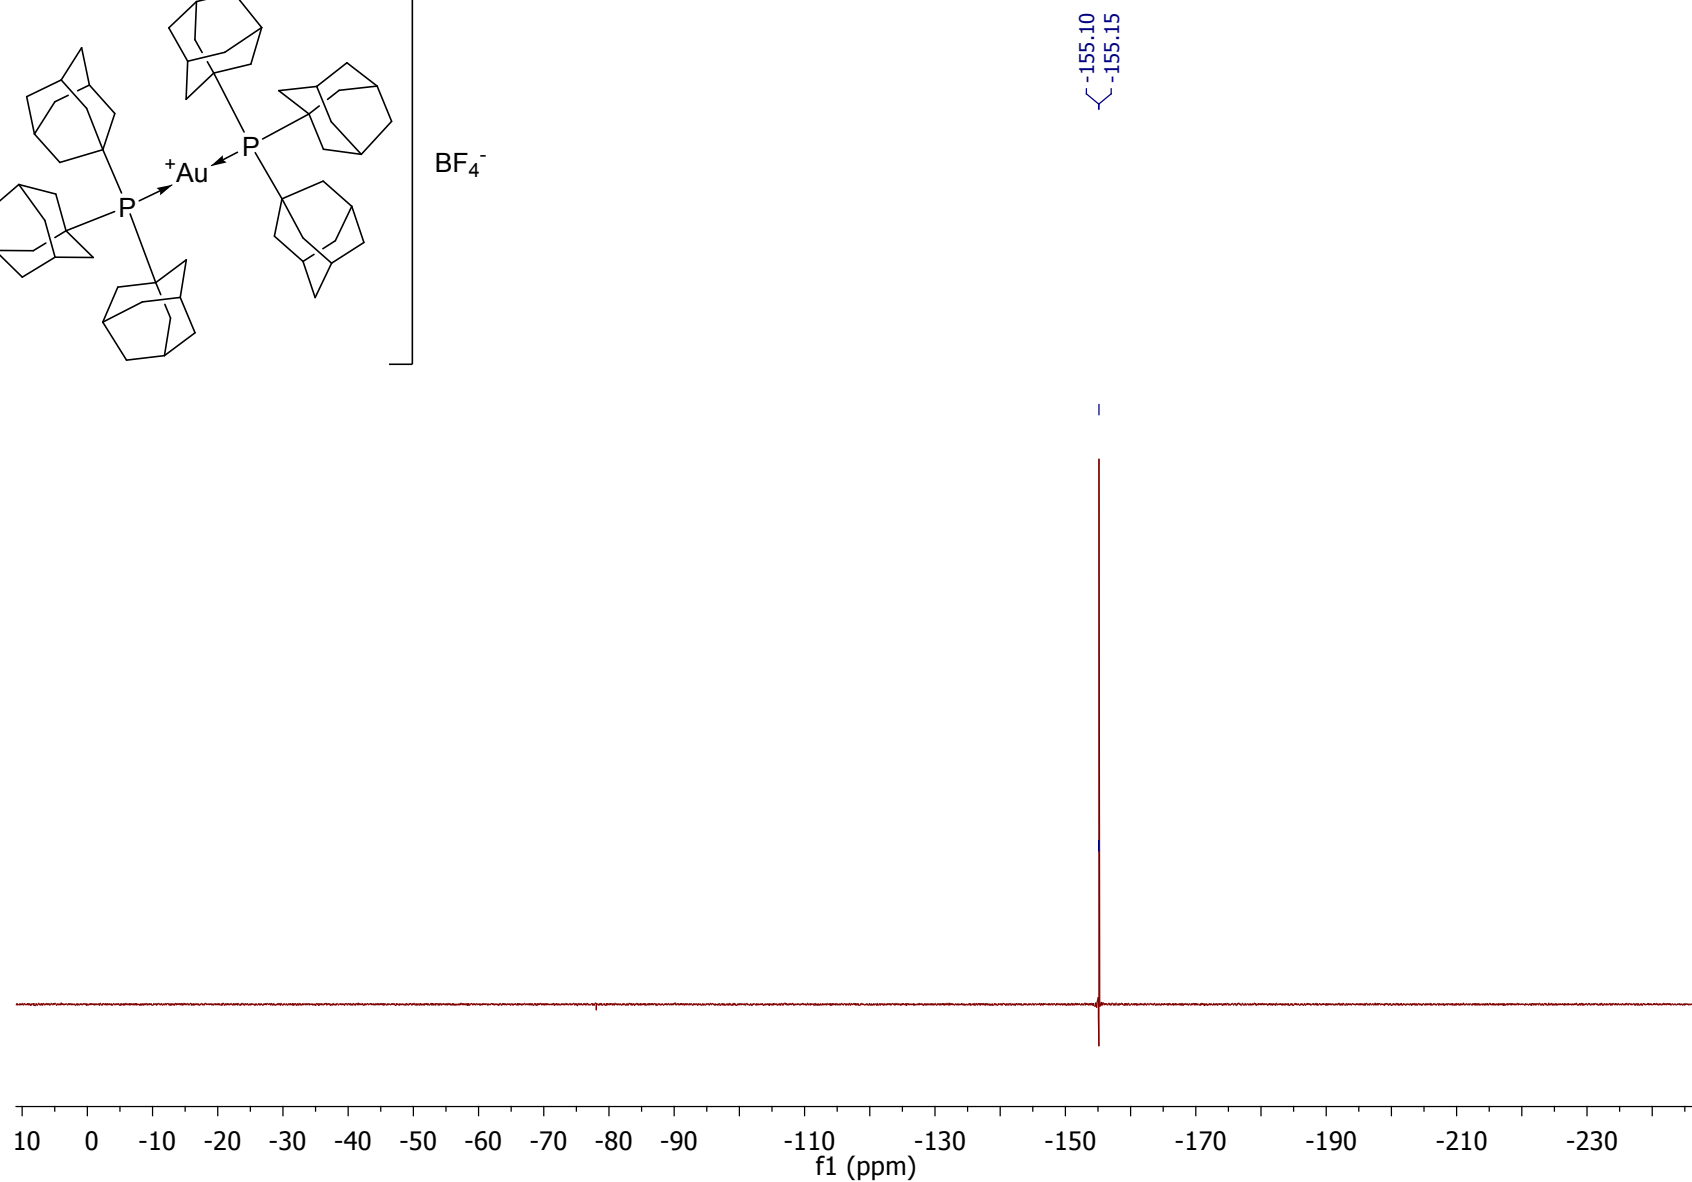

[Au(PAd<sub>3</sub>)<sub>2</sub>]NTf<sub>2</sub> (**4**) <sup>1</sup>H NMR spectrum

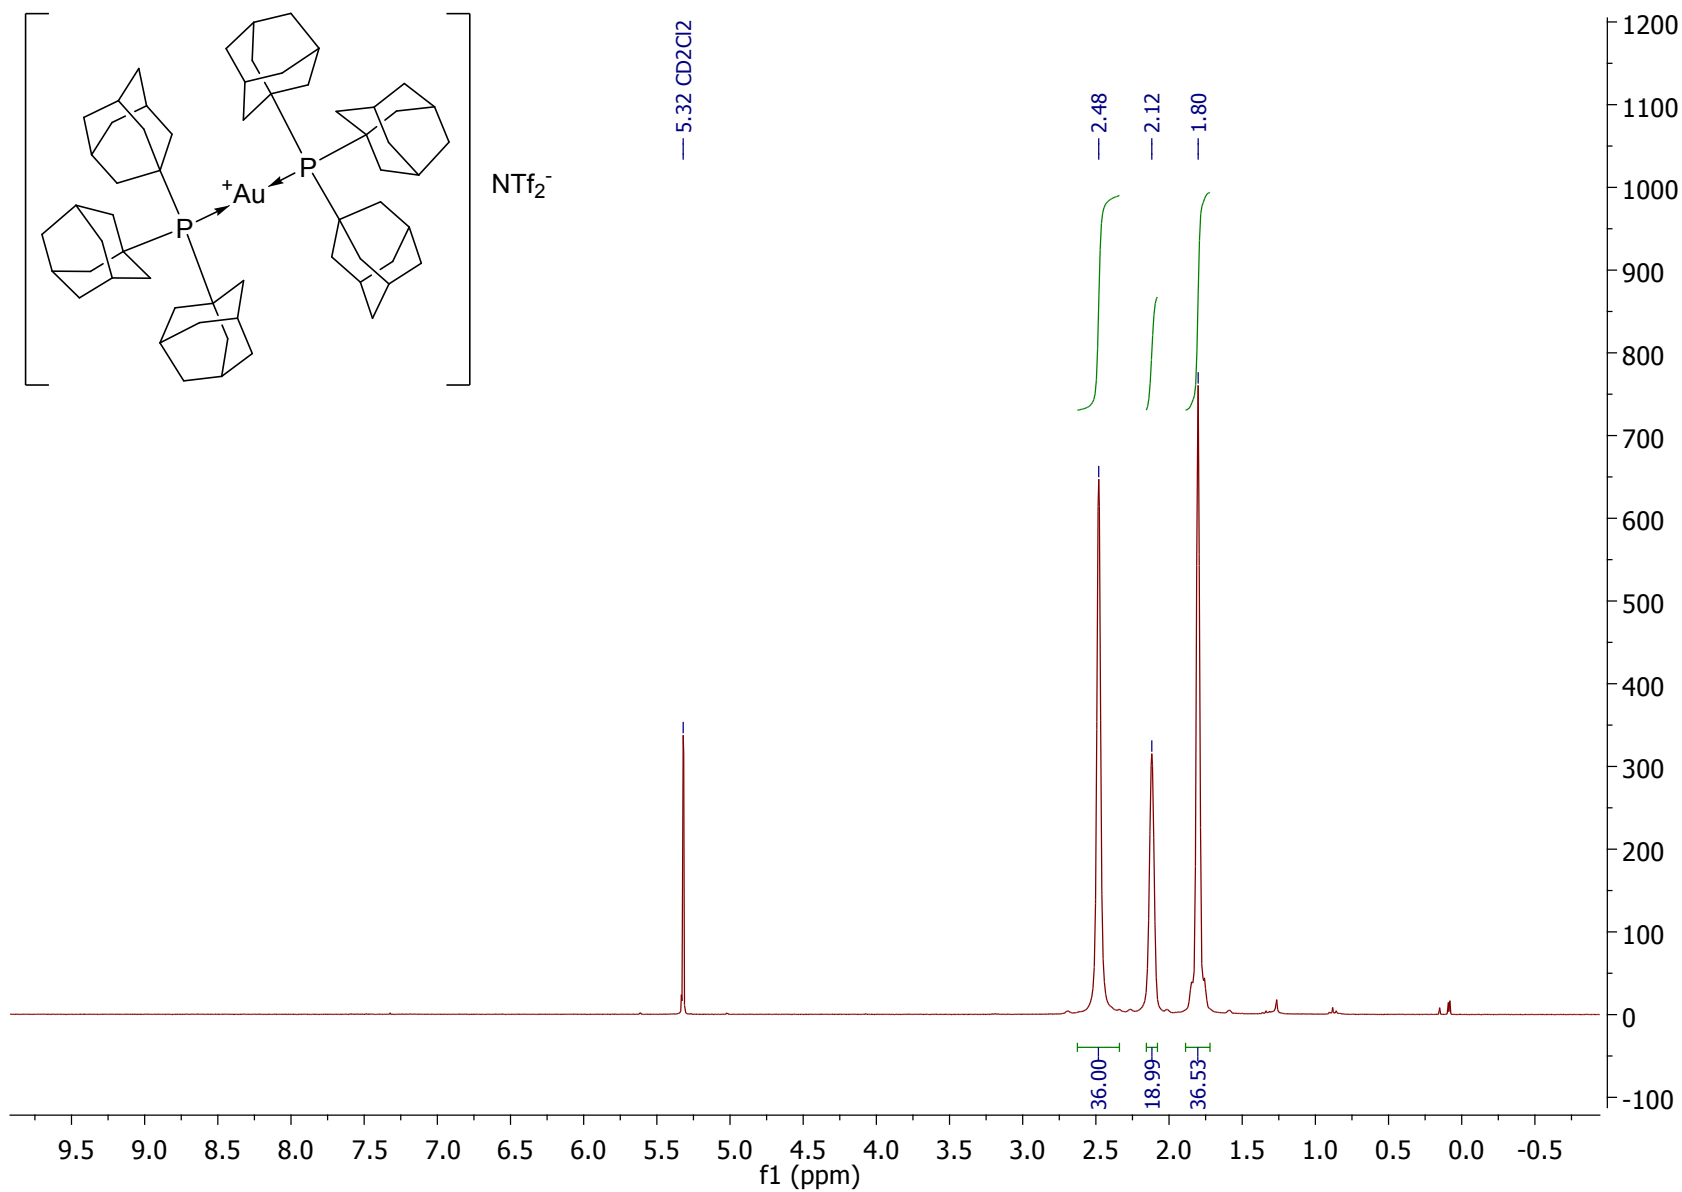

[Au(PAd<sub>3</sub>)<sub>2</sub>]NTf<sub>2</sub> (**4**) <sup>13</sup>C NMR spectrum

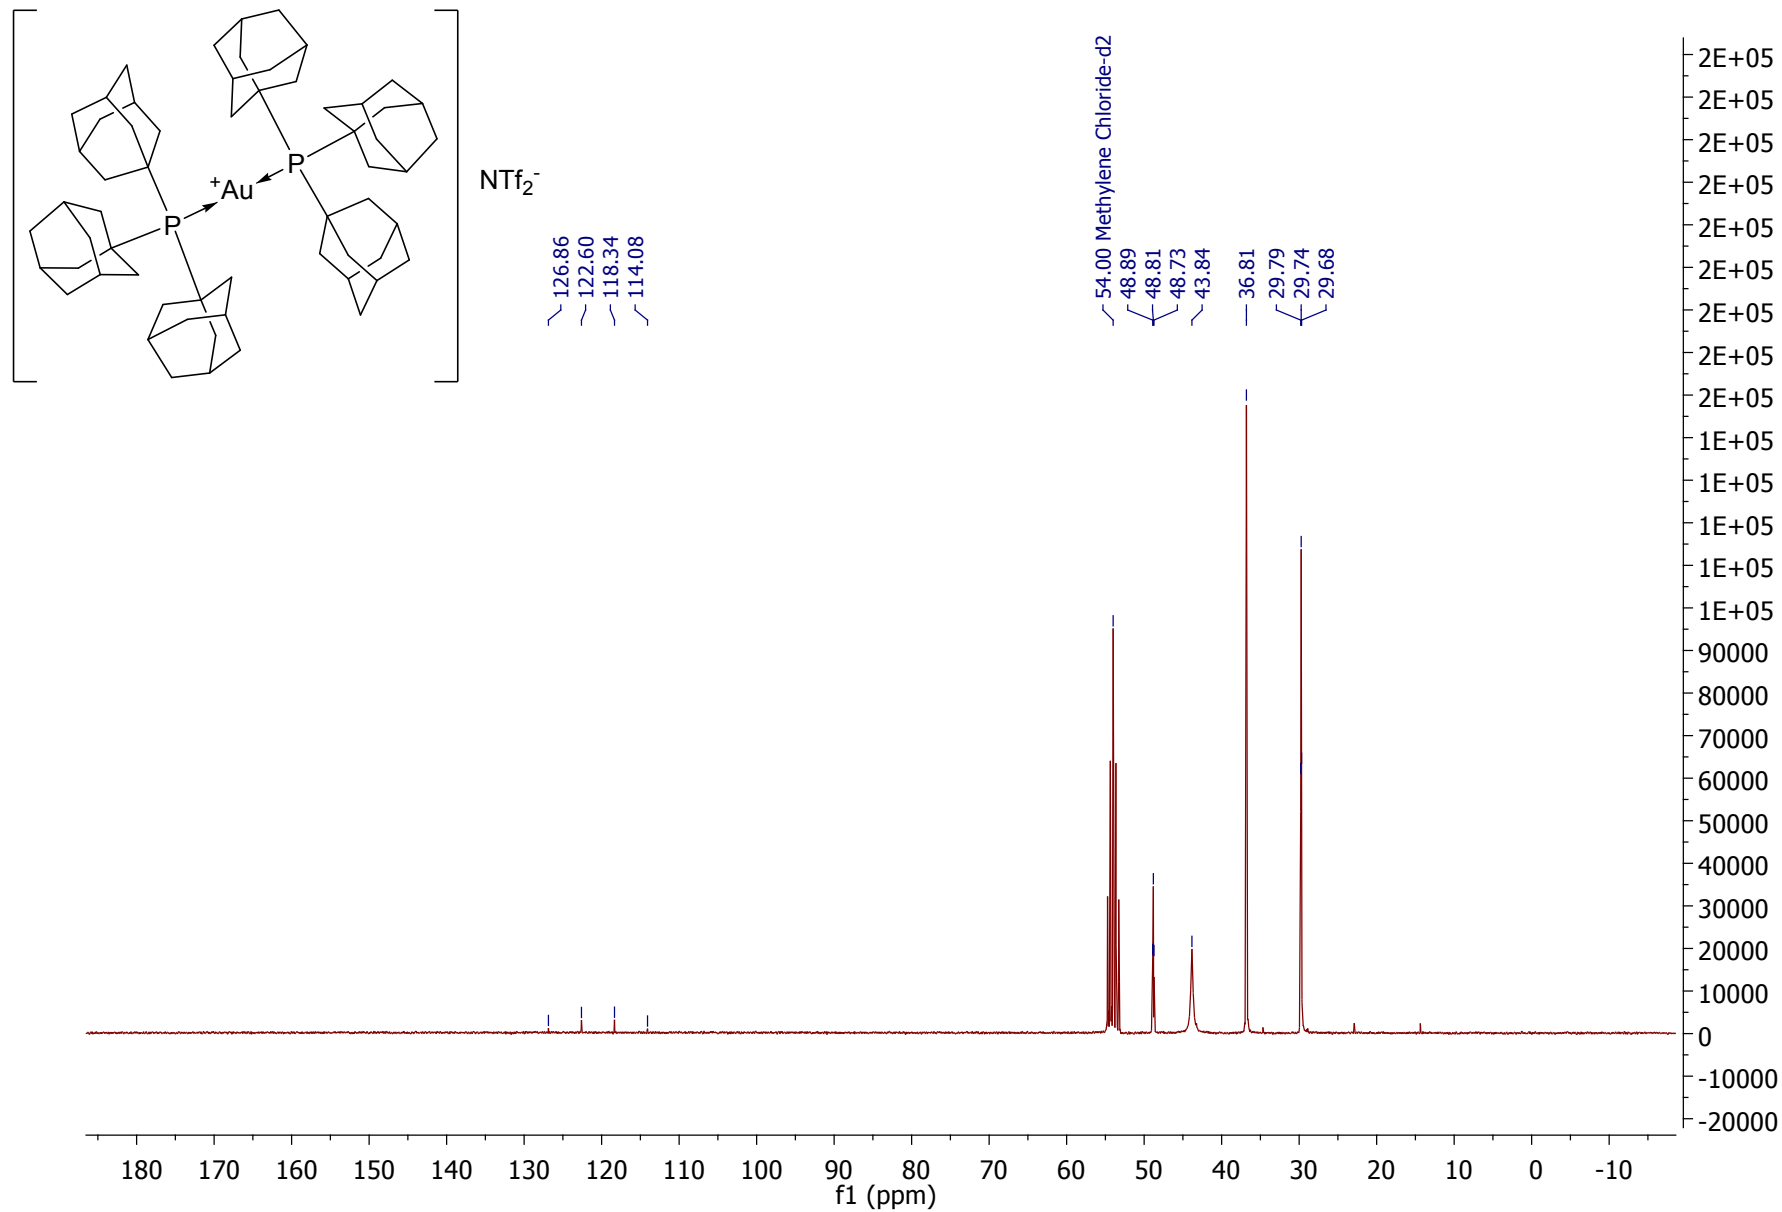



[Au(PAd<sub>3</sub>)<sub>2</sub>]NTf<sub>2</sub> (**4**) <sup>31</sup>P NMR spectrum

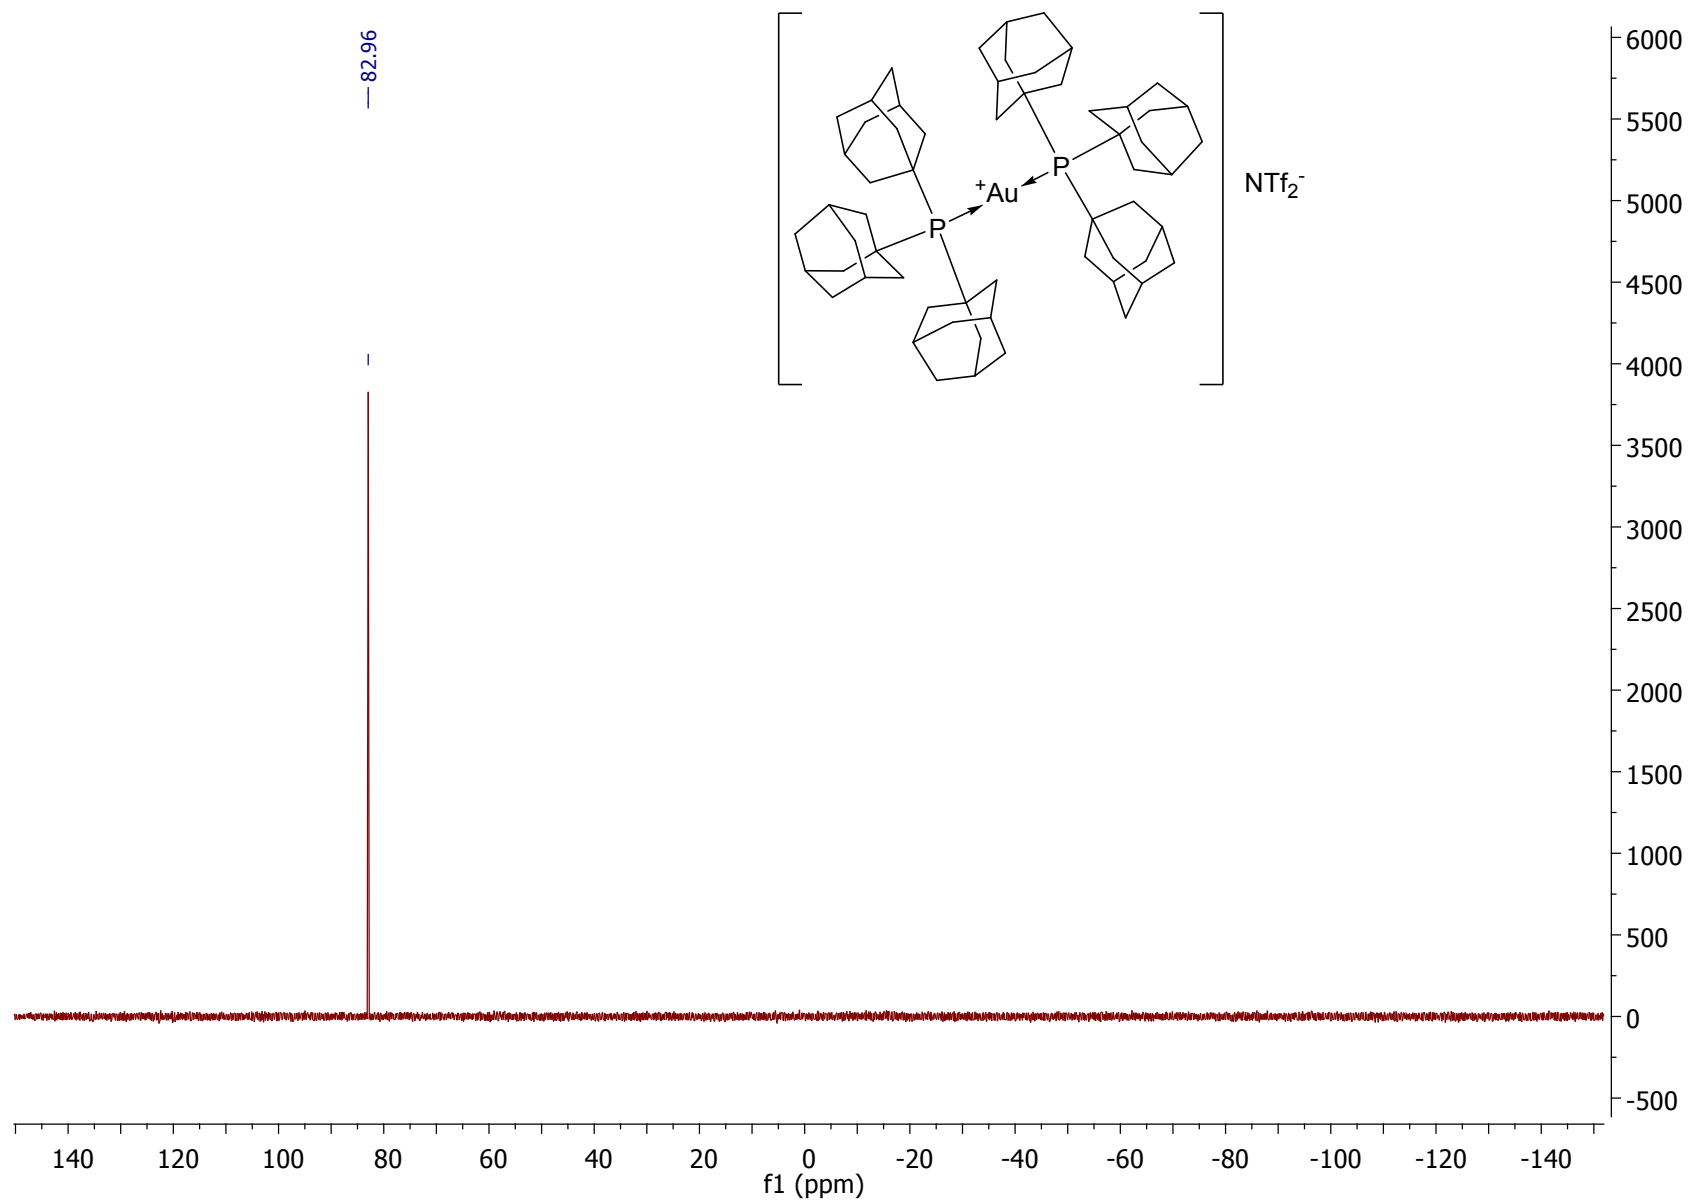

[Au(PAd<sub>3</sub>)<sub>2</sub>]NTf<sub>2</sub> (**4**) <sup>19</sup>F NMR spectrum

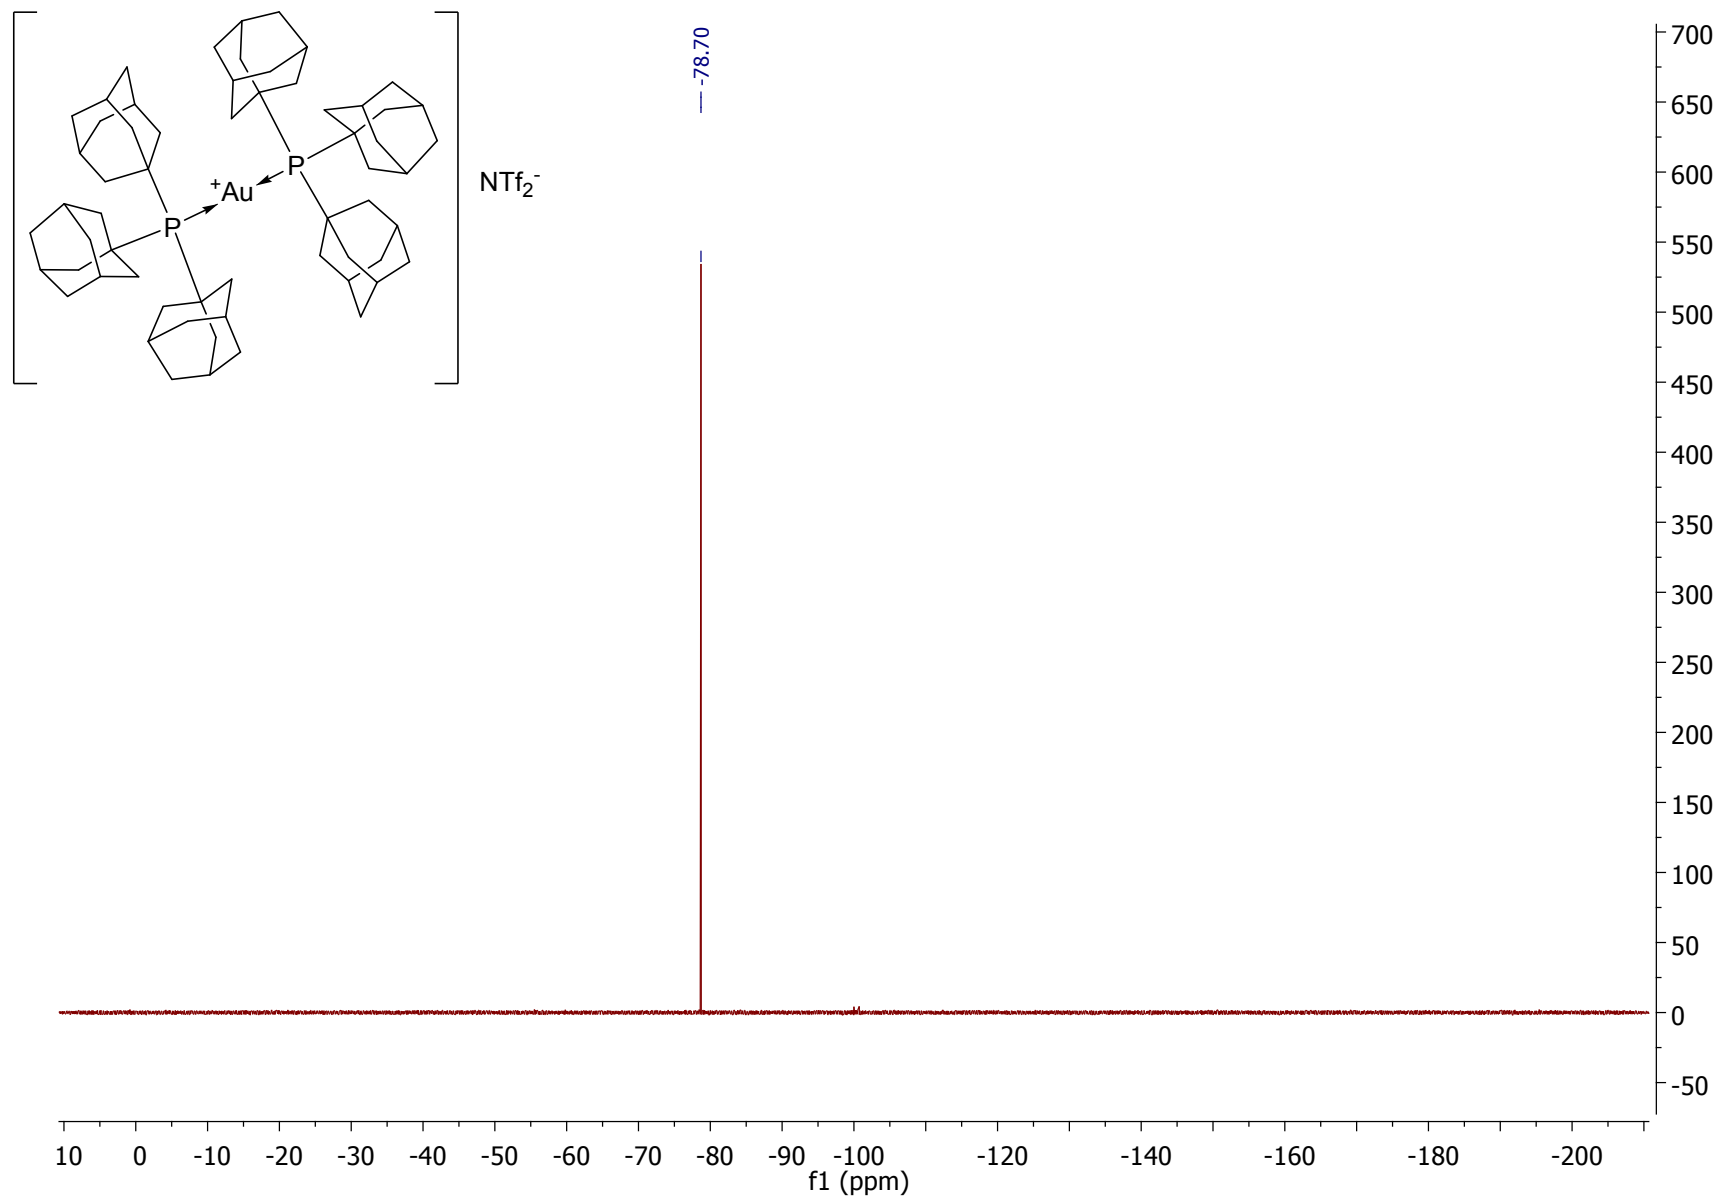

[Au(PAd<sub>3</sub>)(NTf<sub>2</sub>)] (5) <sup>1</sup>H NMR spectrum

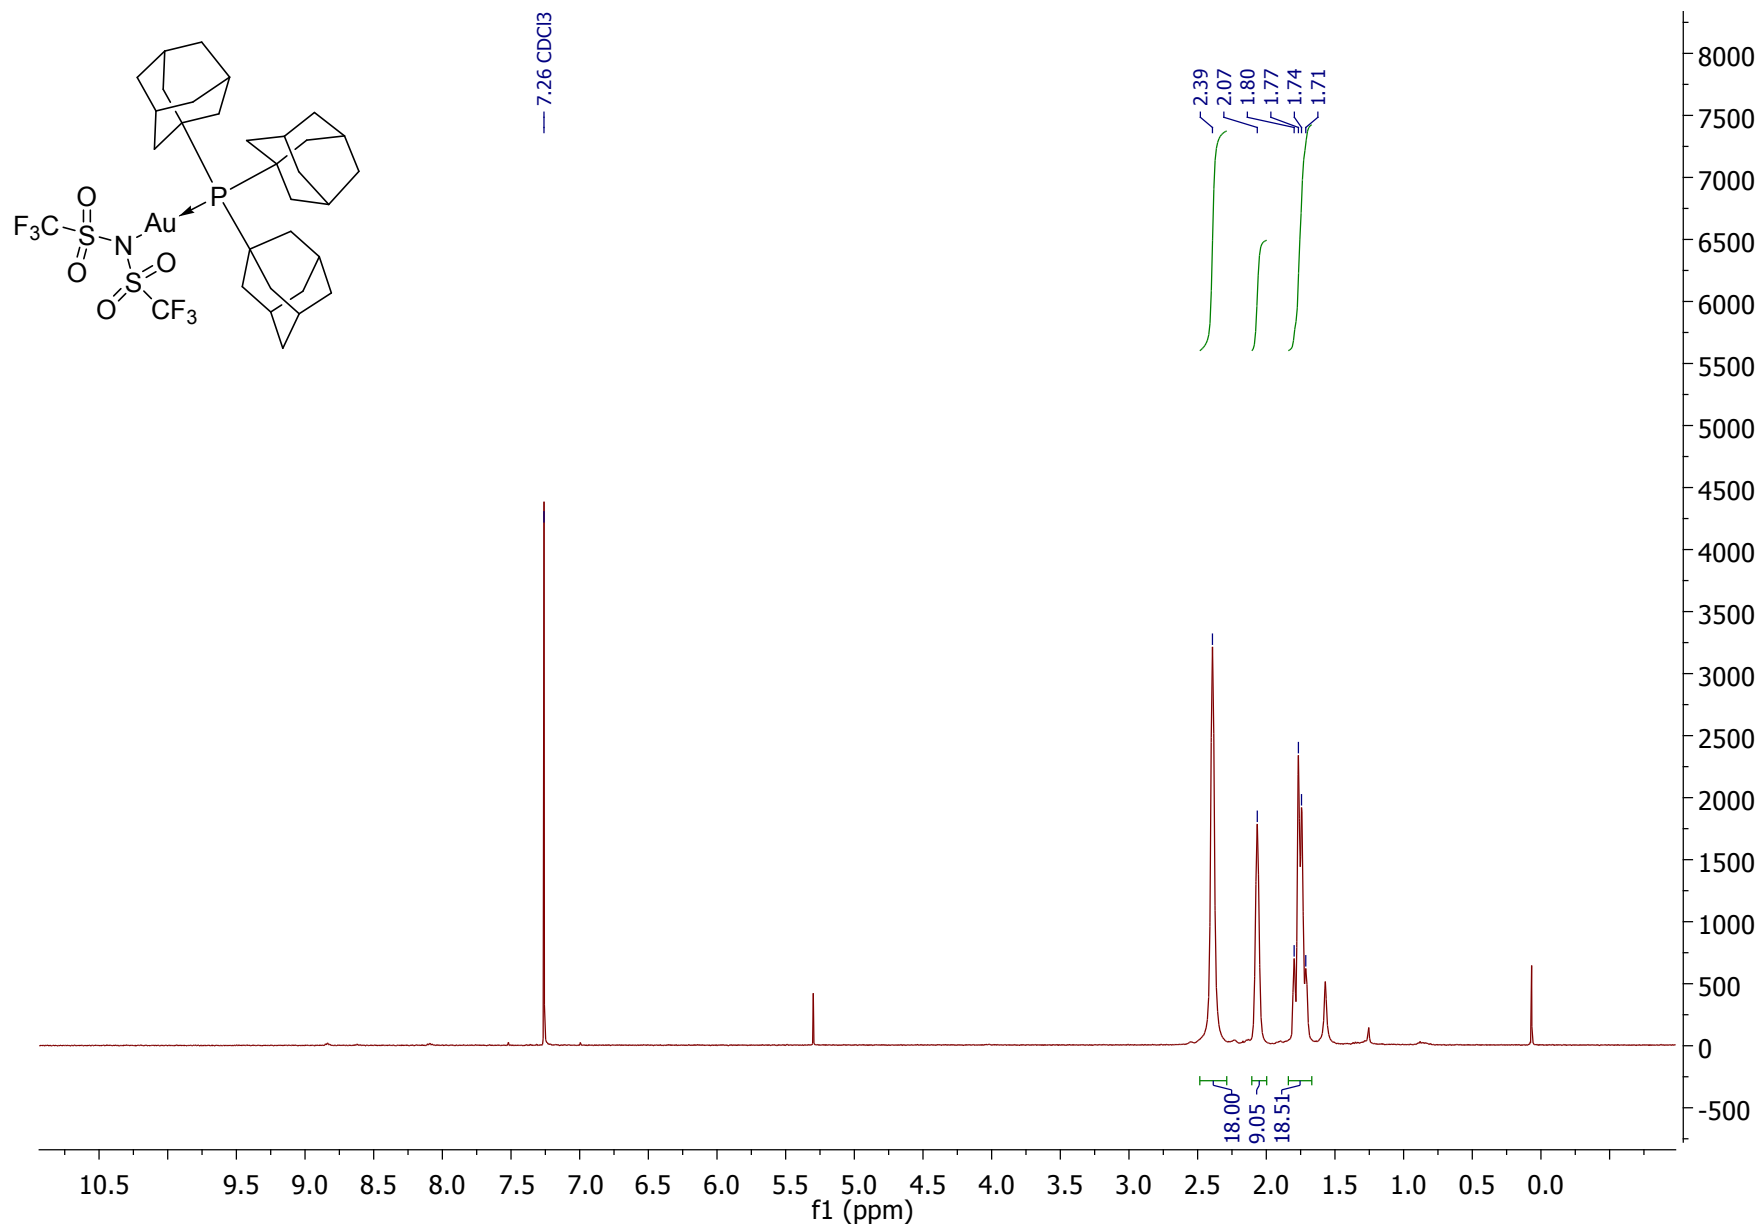

[Au(PAd<sub>3</sub>)(NTf<sub>2</sub>)] (5) <sup>31</sup>P NMR spectrum

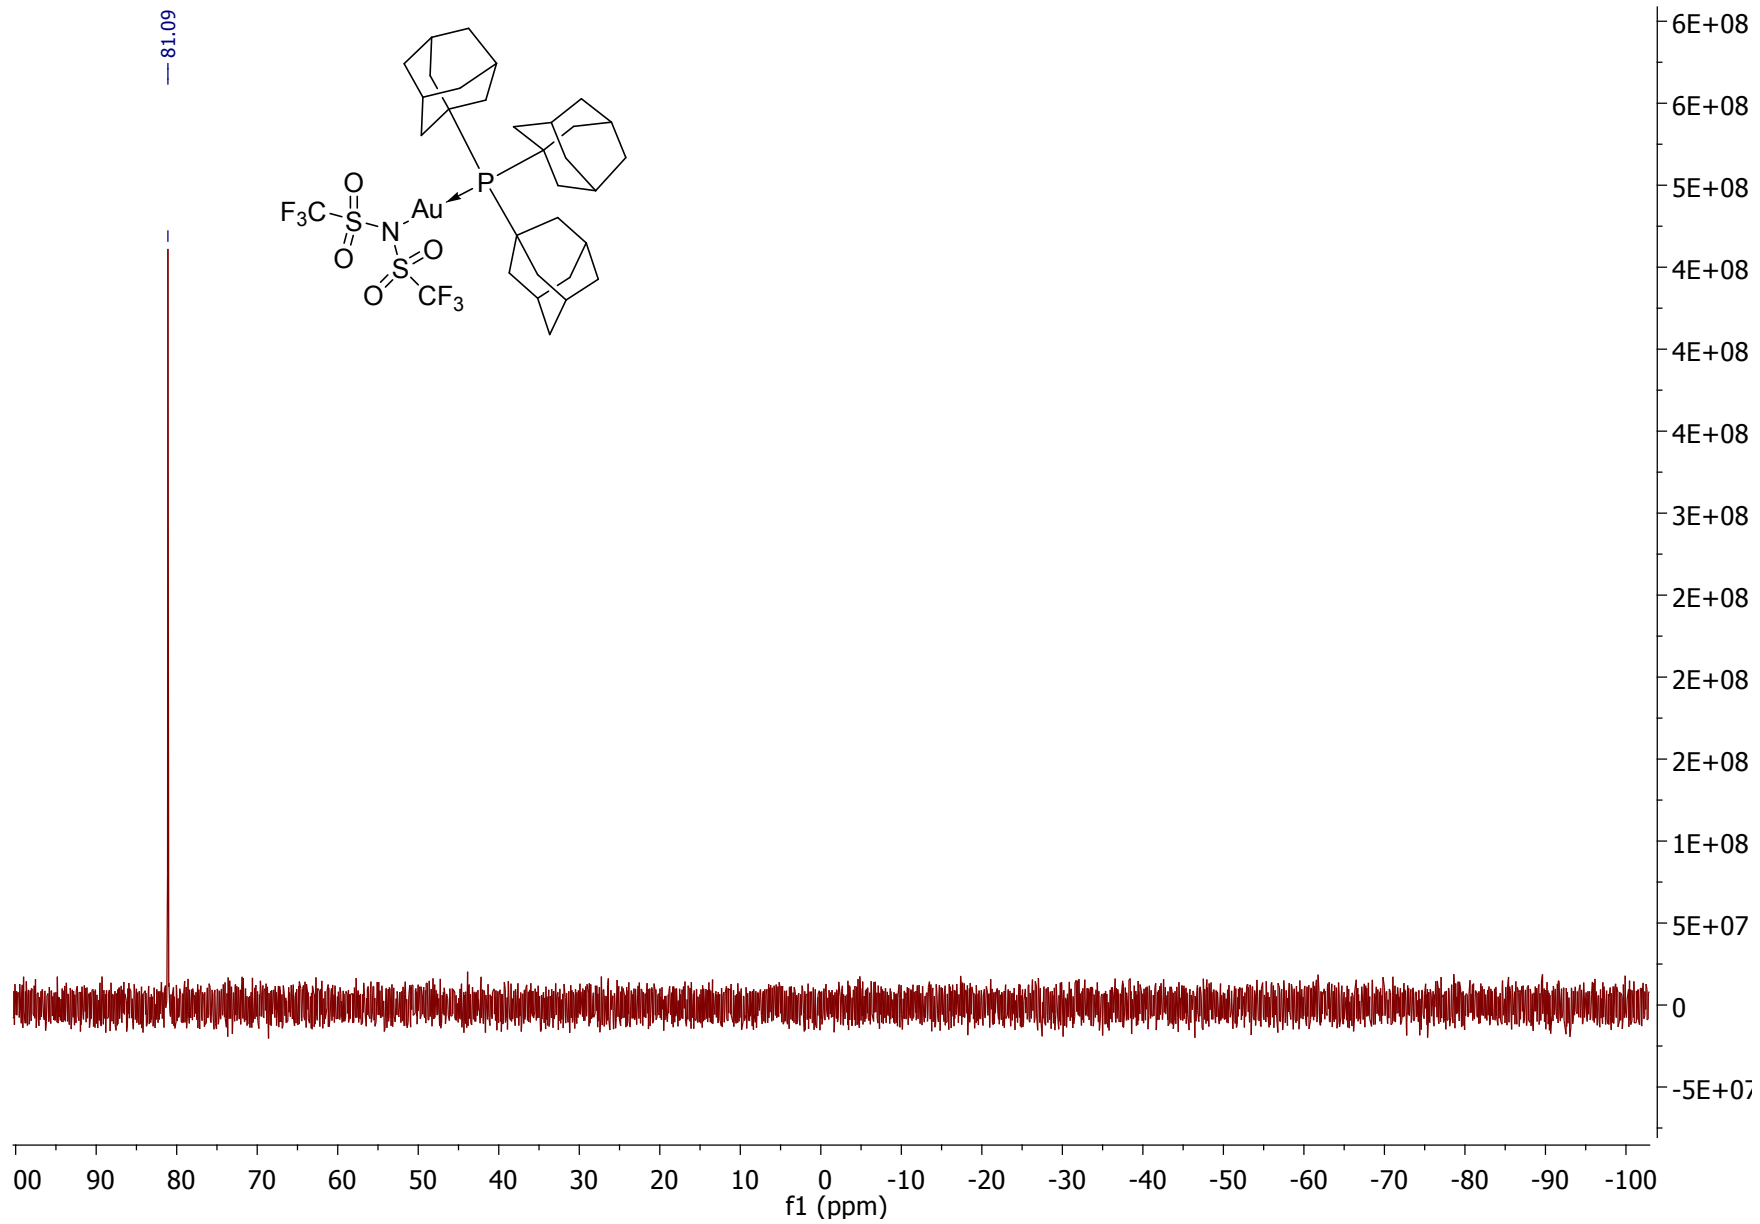

[Au(PAd<sub>3</sub>)(NTf<sub>2</sub>)] (5) <sup>19</sup>F NMR spectrum

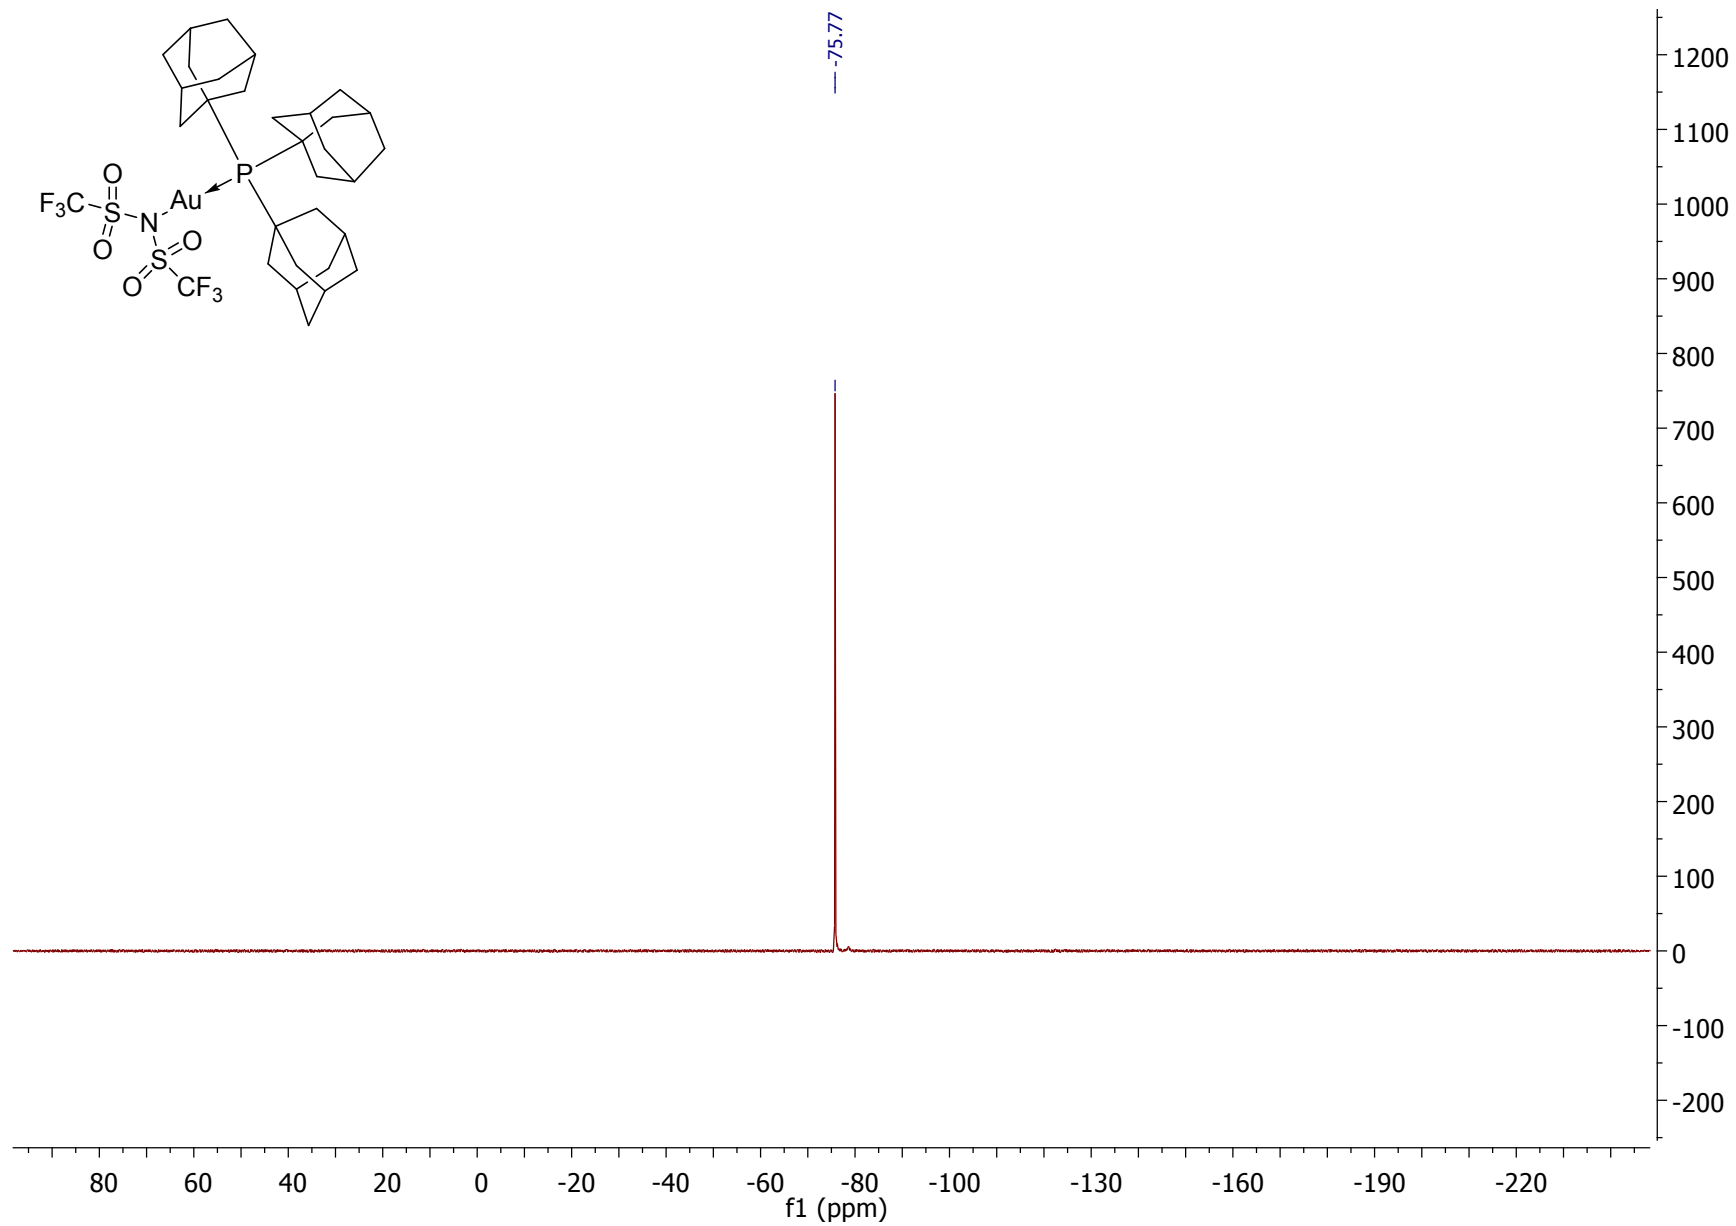

[Au(PAd<sub>3</sub>)OTf] (6) <sup>1</sup>H NMR spectrum

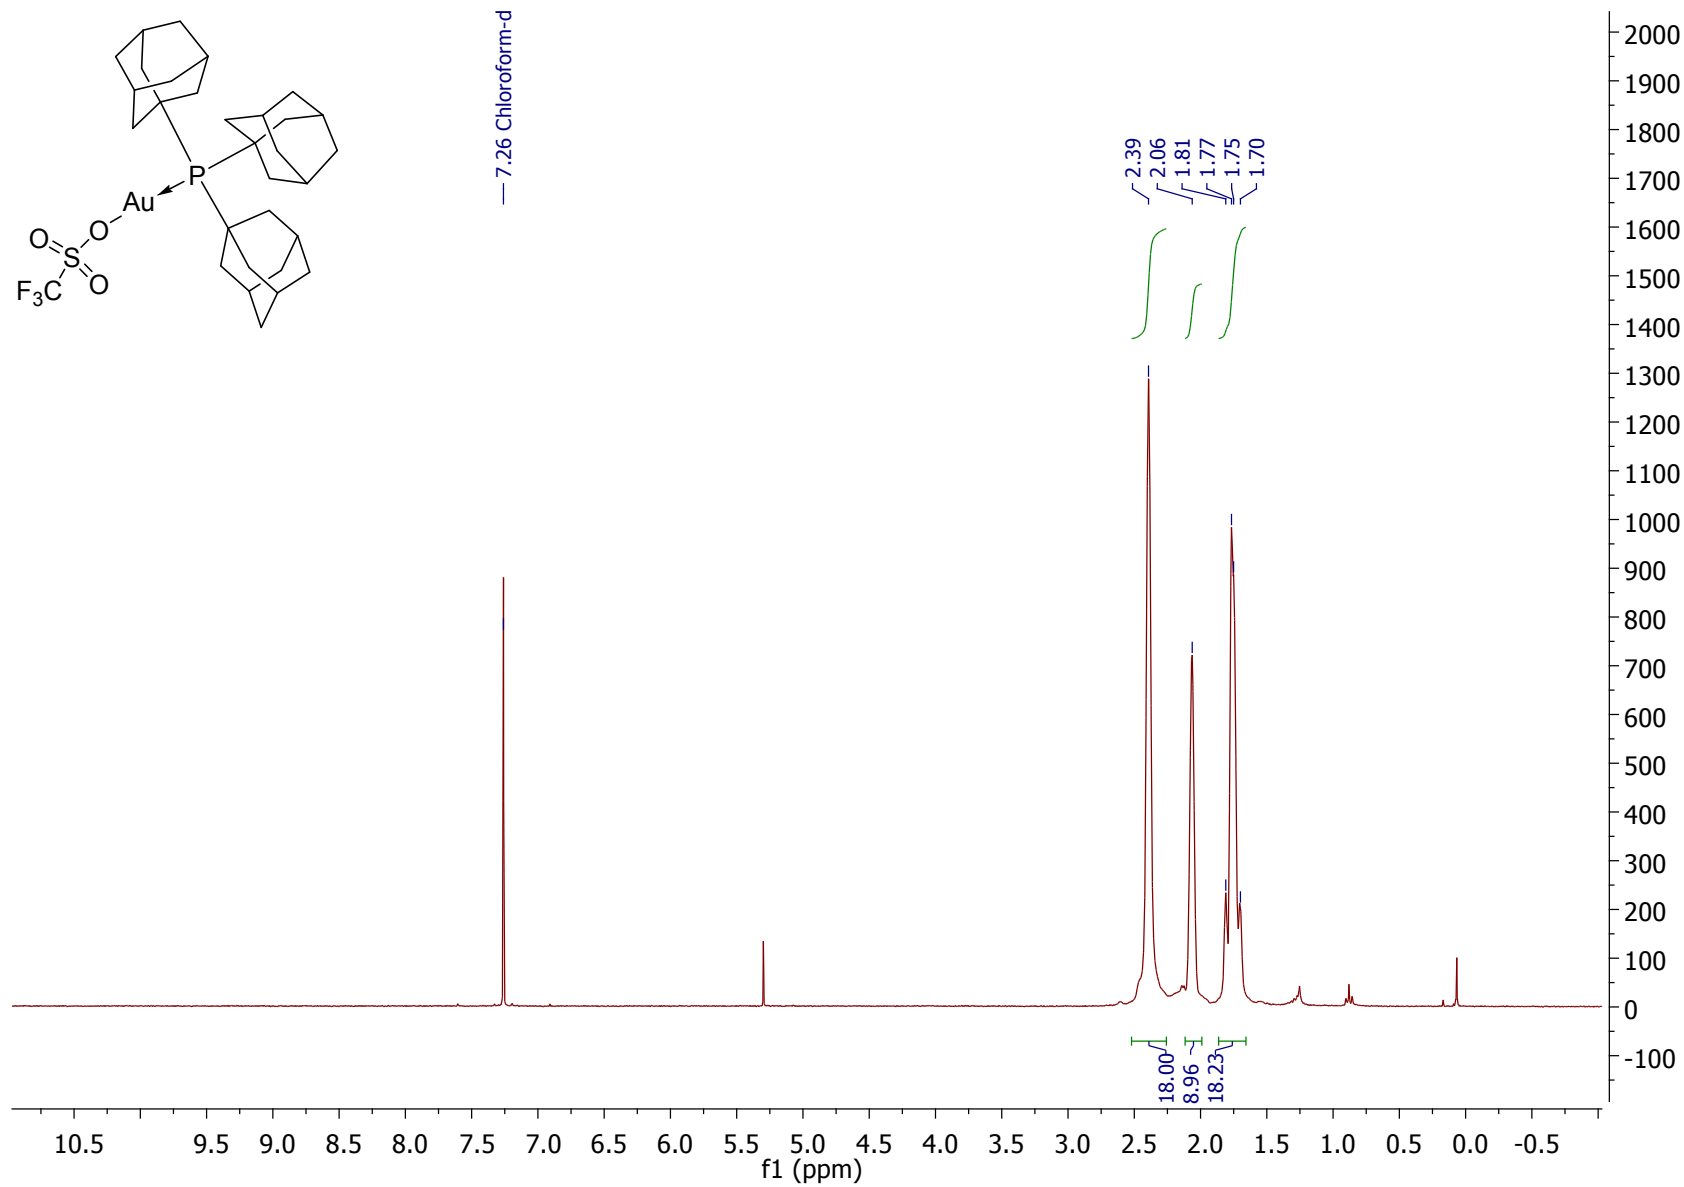

[Au(PAd<sub>3</sub>)OTf] (6) <sup>13</sup>C NMR spectrum

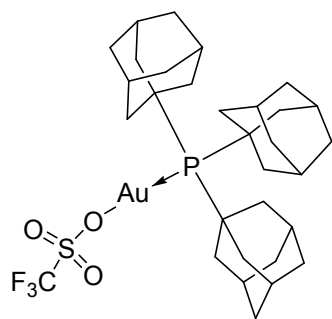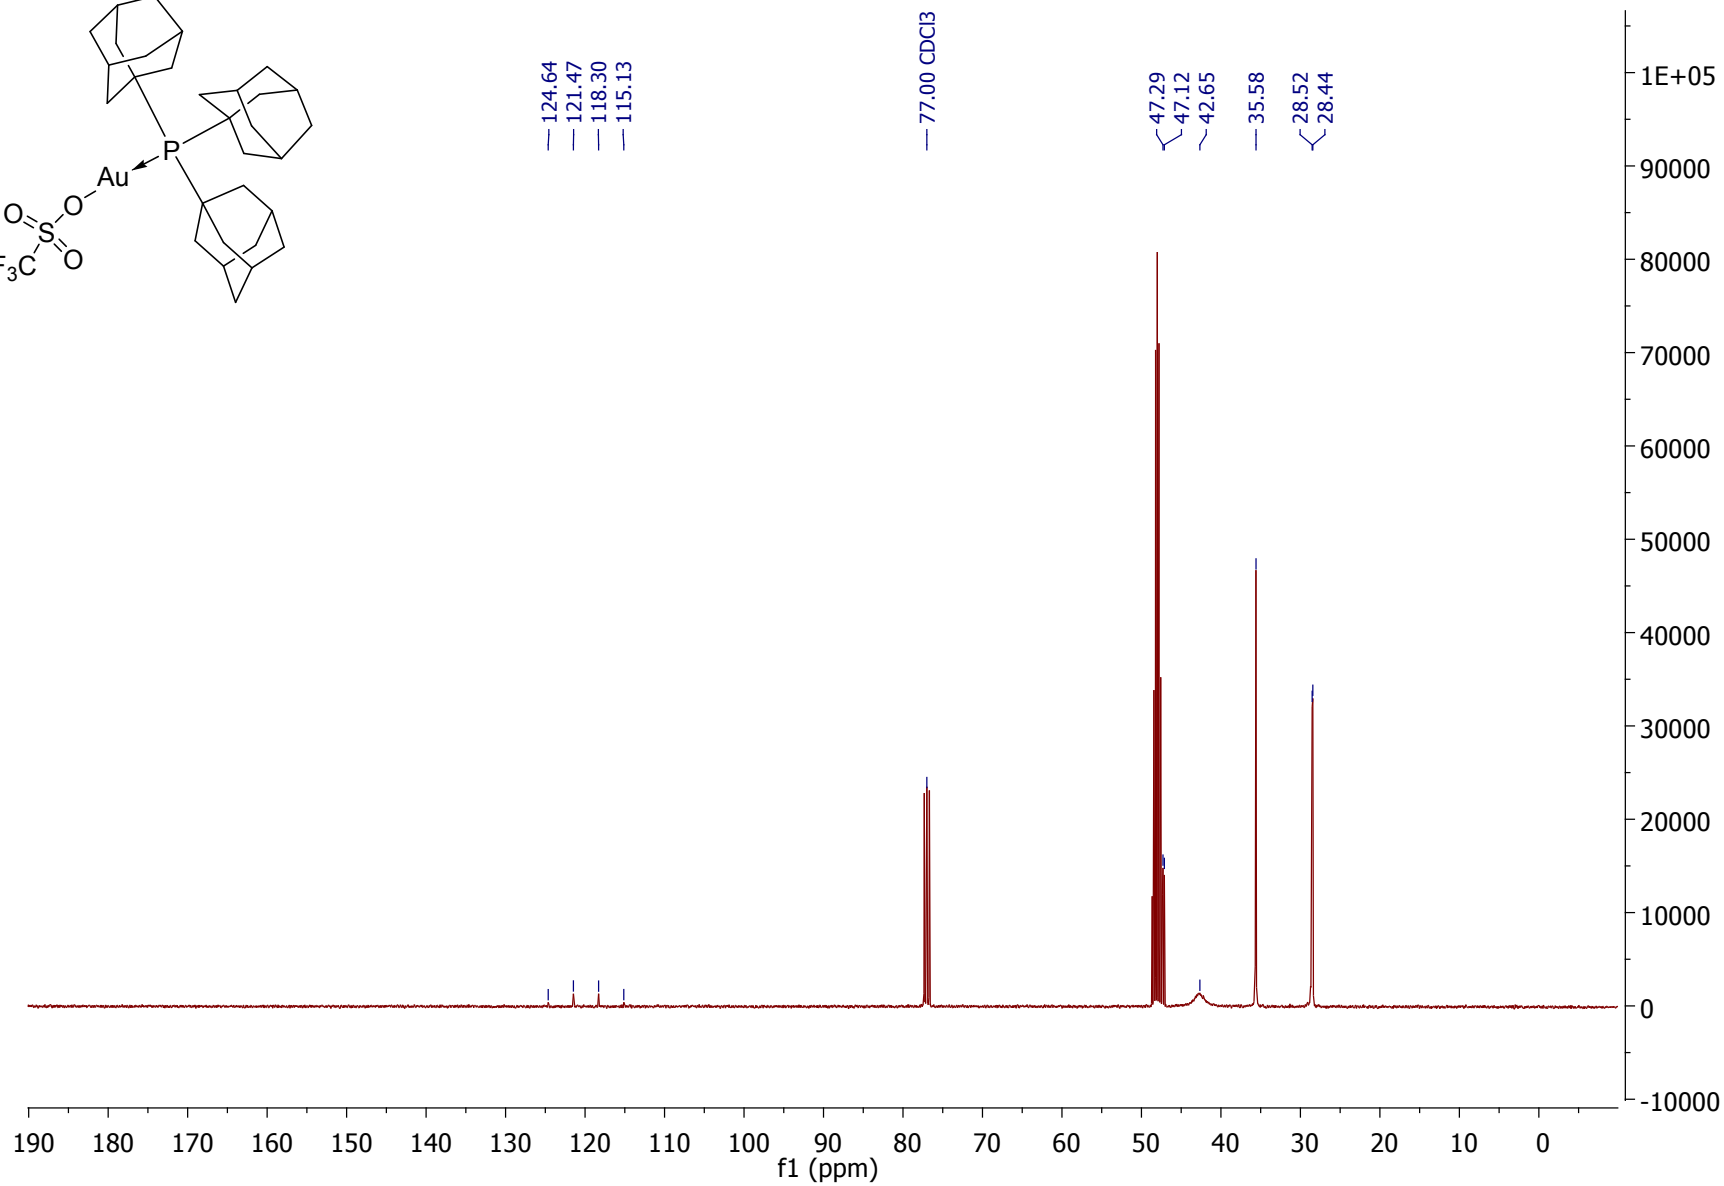

[Au(PAd<sub>3</sub>)OTf] (6) <sup>31</sup>P NMR spectrum

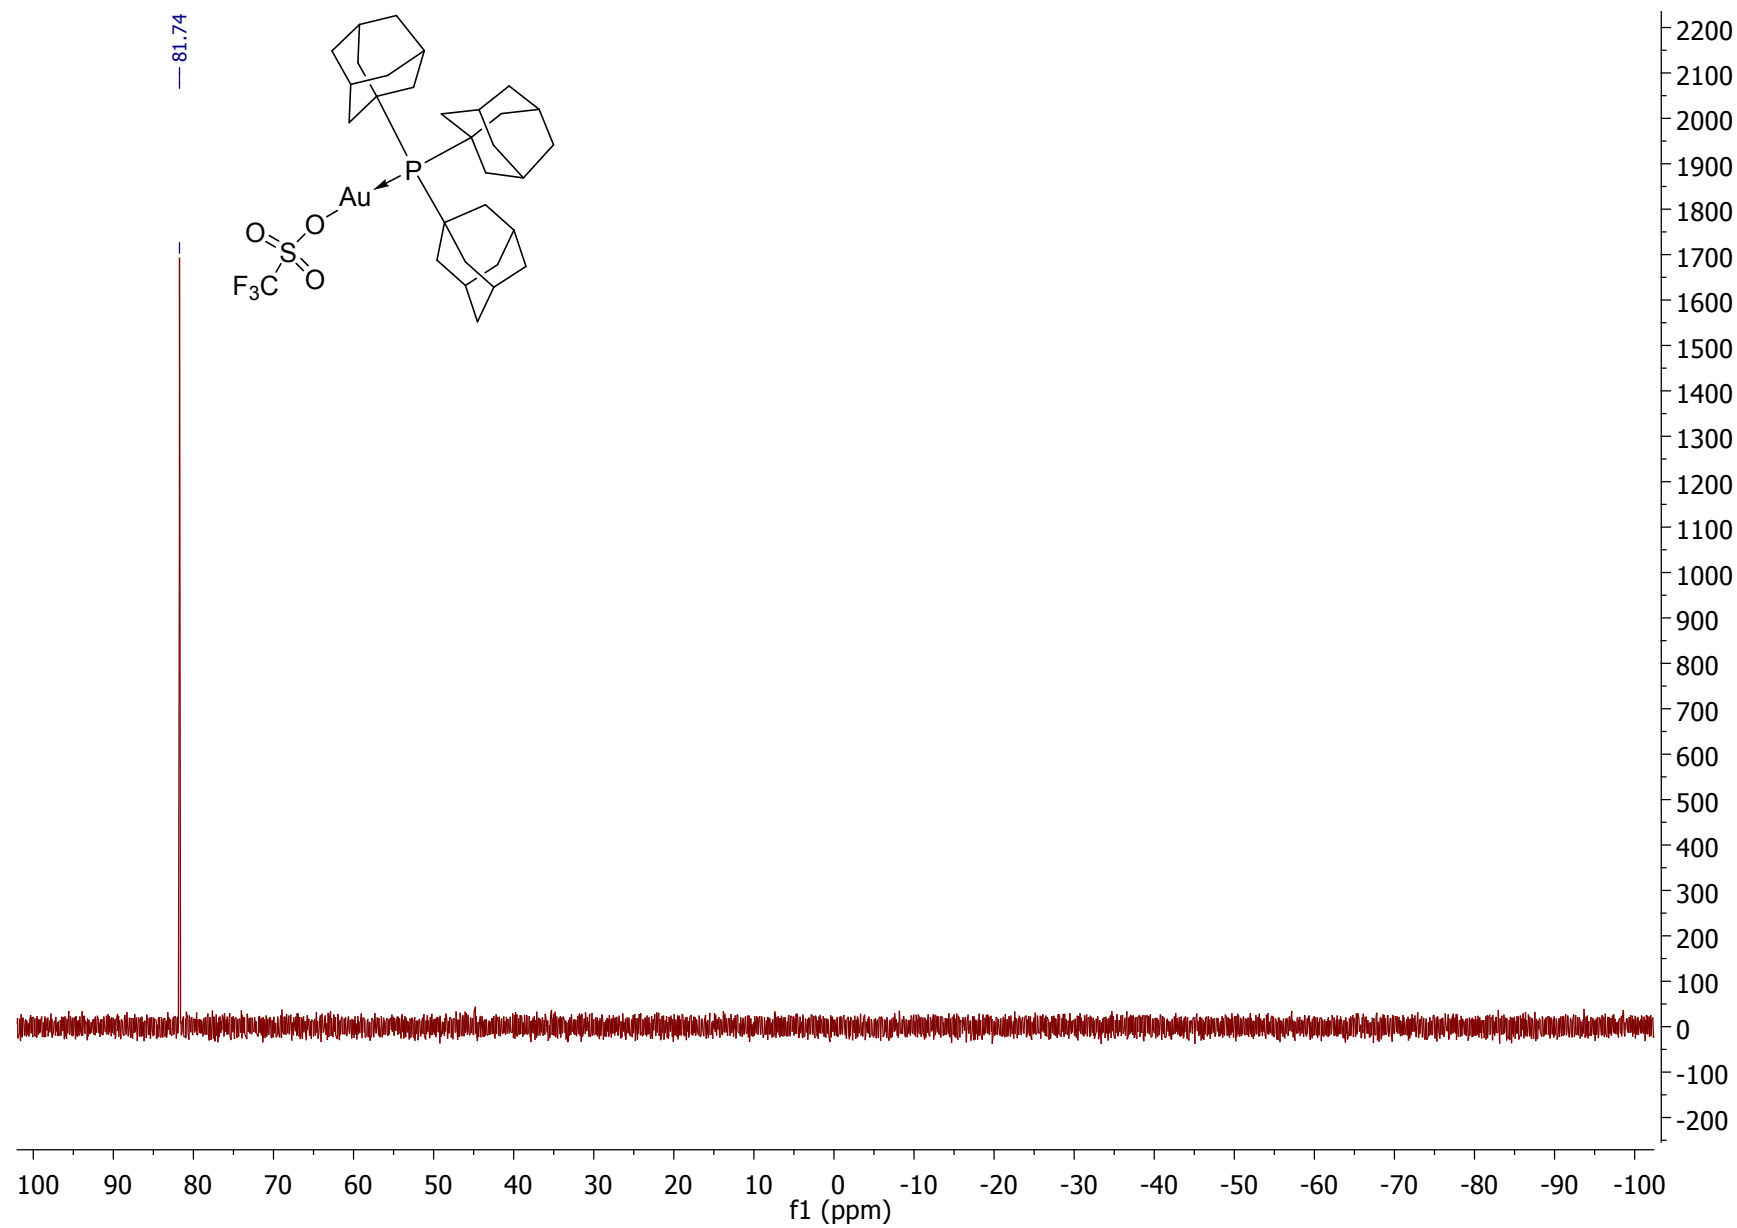



[Au(PAd<sub>3</sub>)OTf] (6) <sup>19</sup>F NMR spectrum

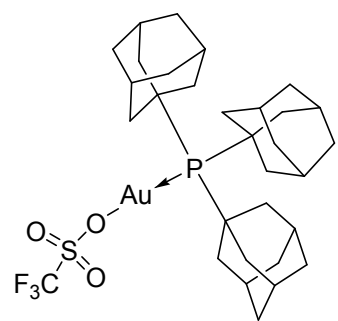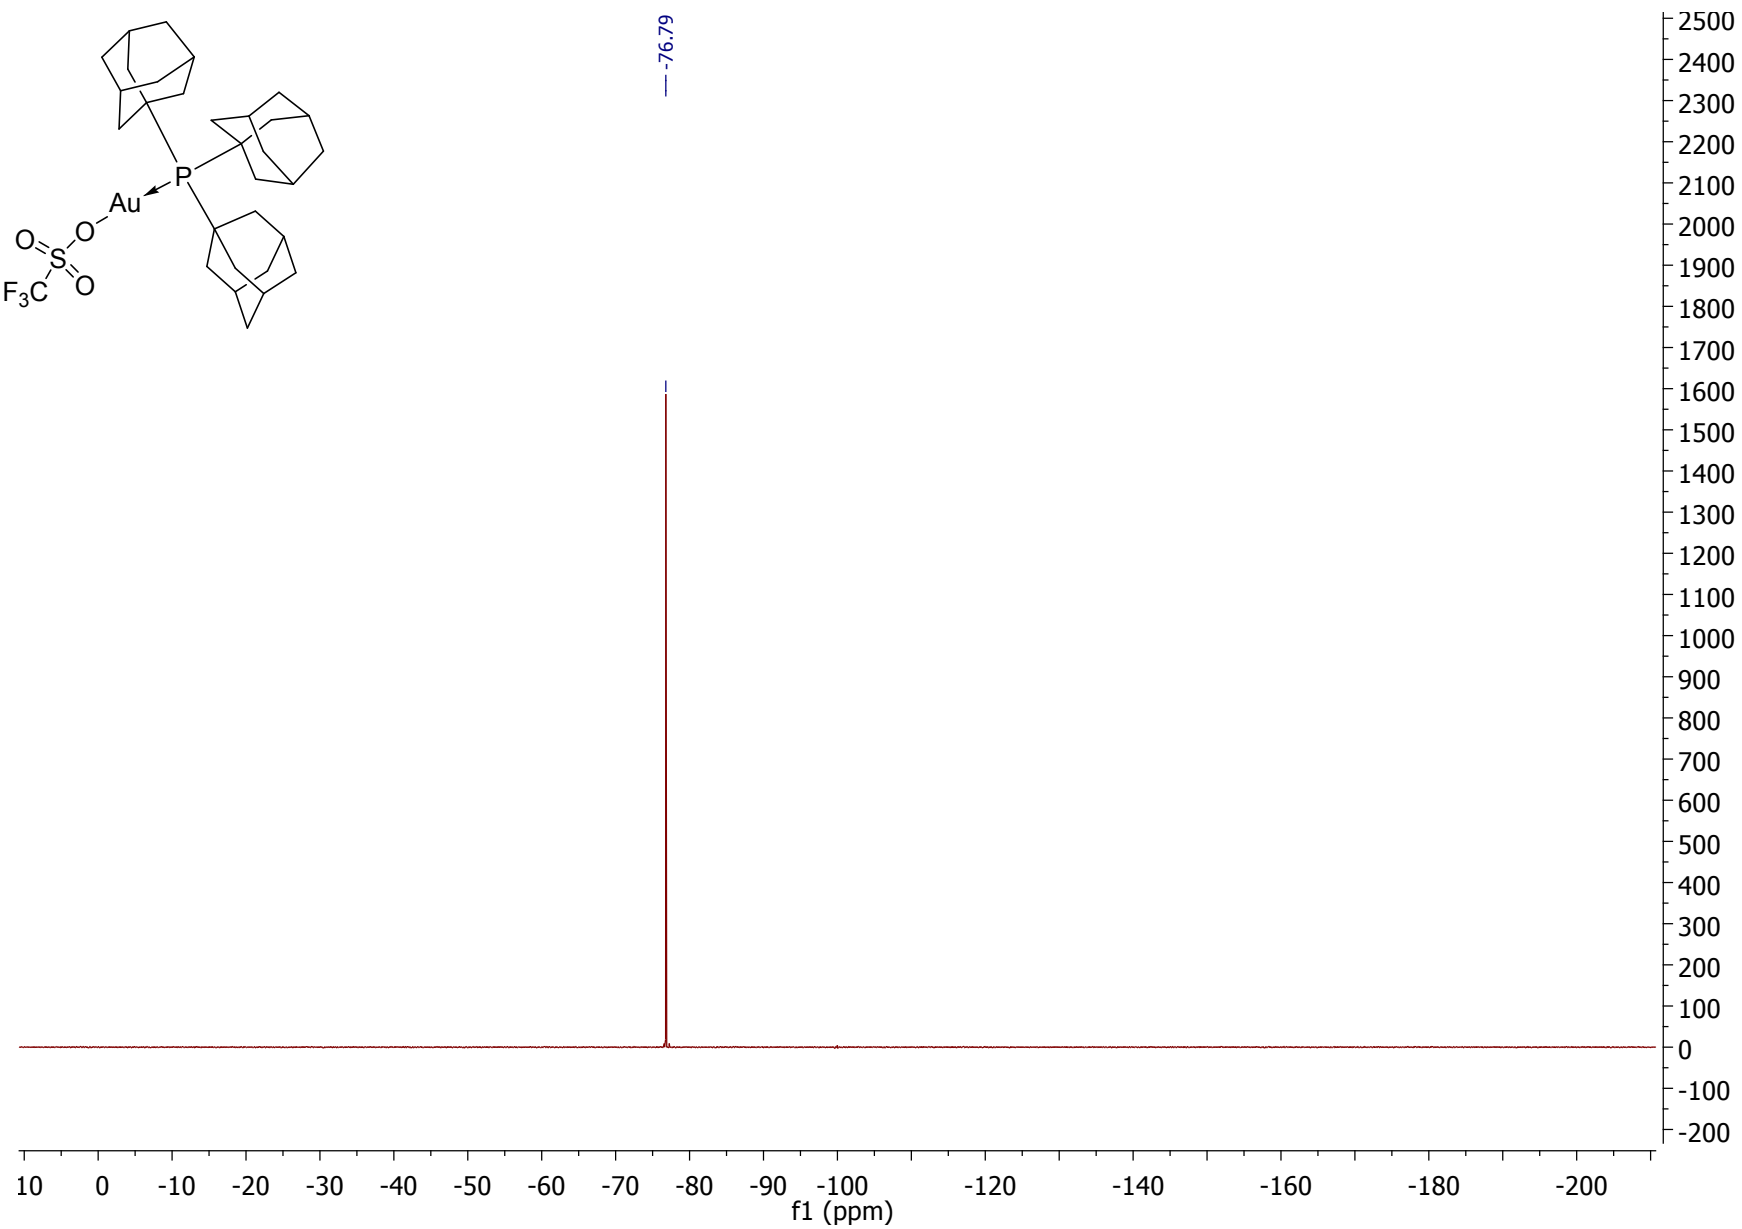

[Au(PAd<sub>3</sub>)(MeCN)]BF<sub>4</sub> (**7**) <sup>1</sup>H NMR spectrum

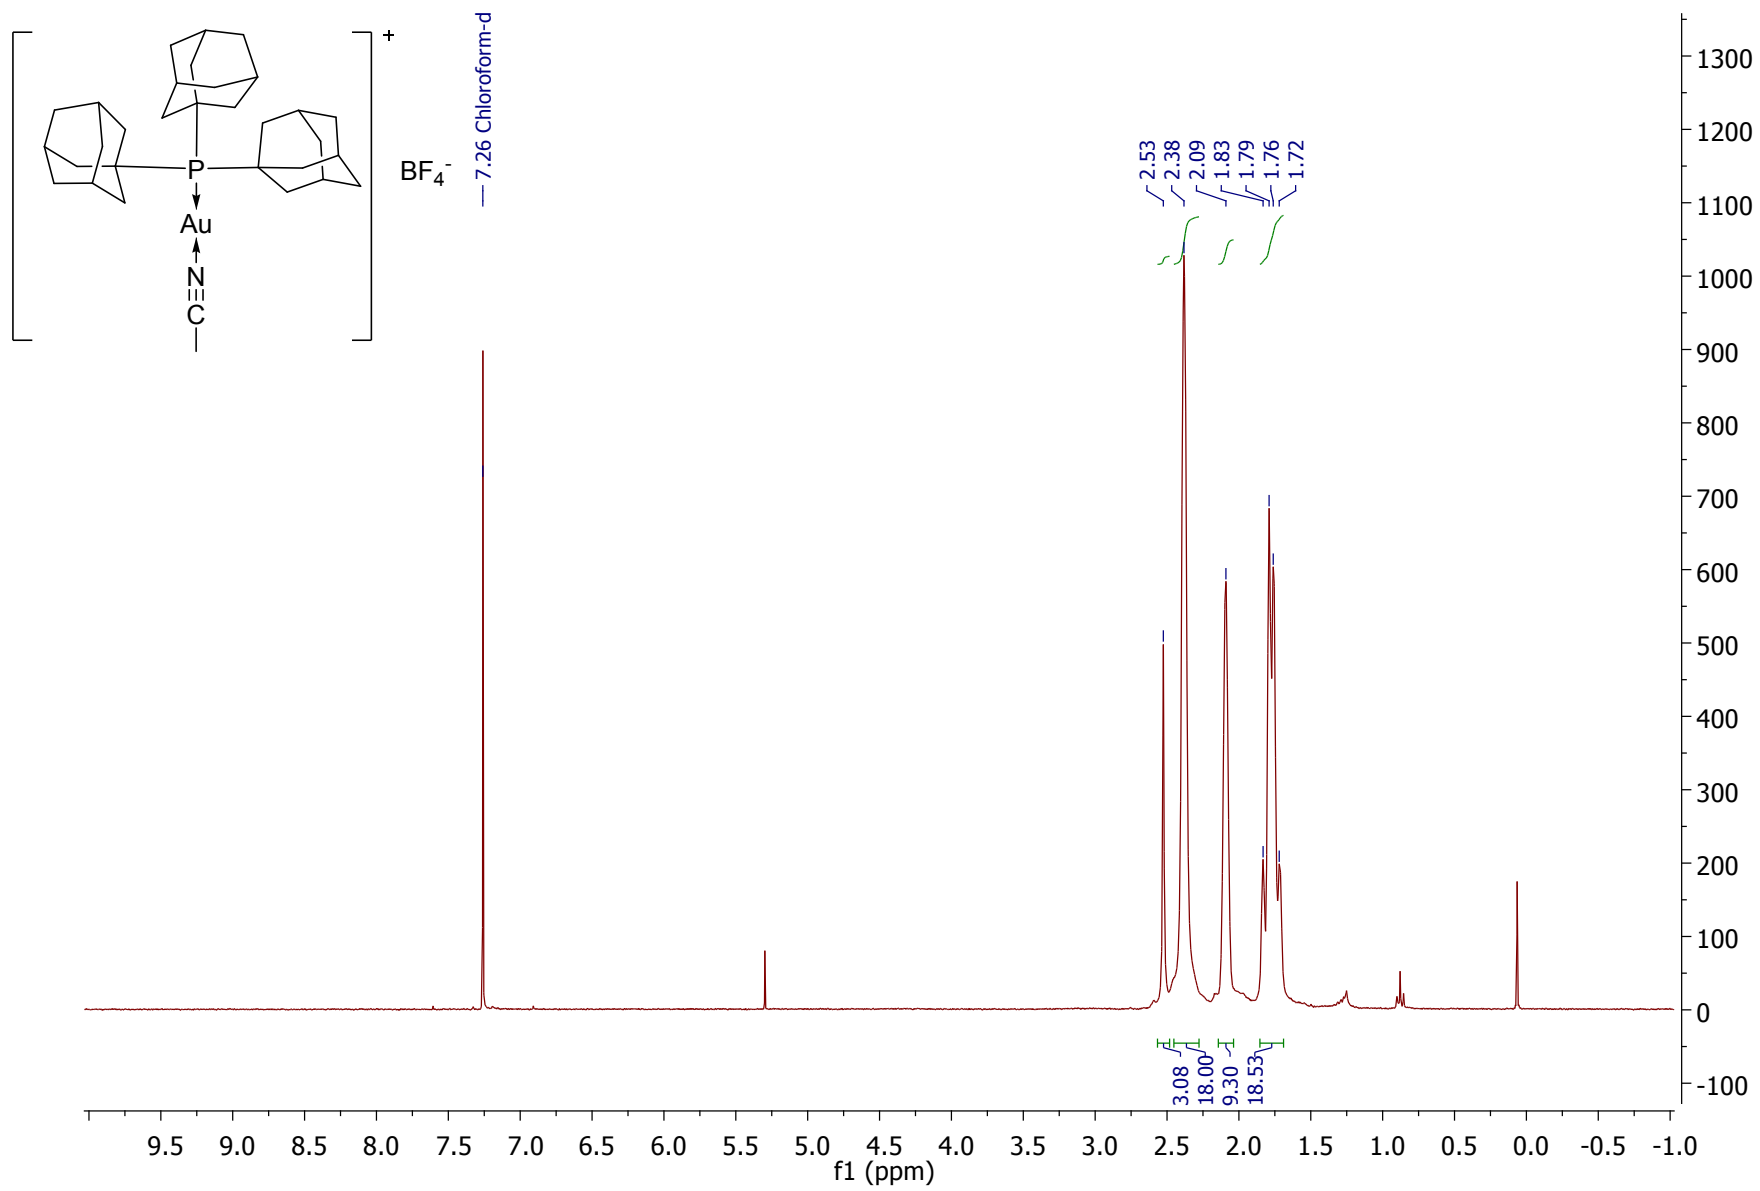

[Au(PAd<sub>3</sub>)(MeCN)]BF<sub>4</sub> (**7**) <sup>13</sup>C NMR spectrum

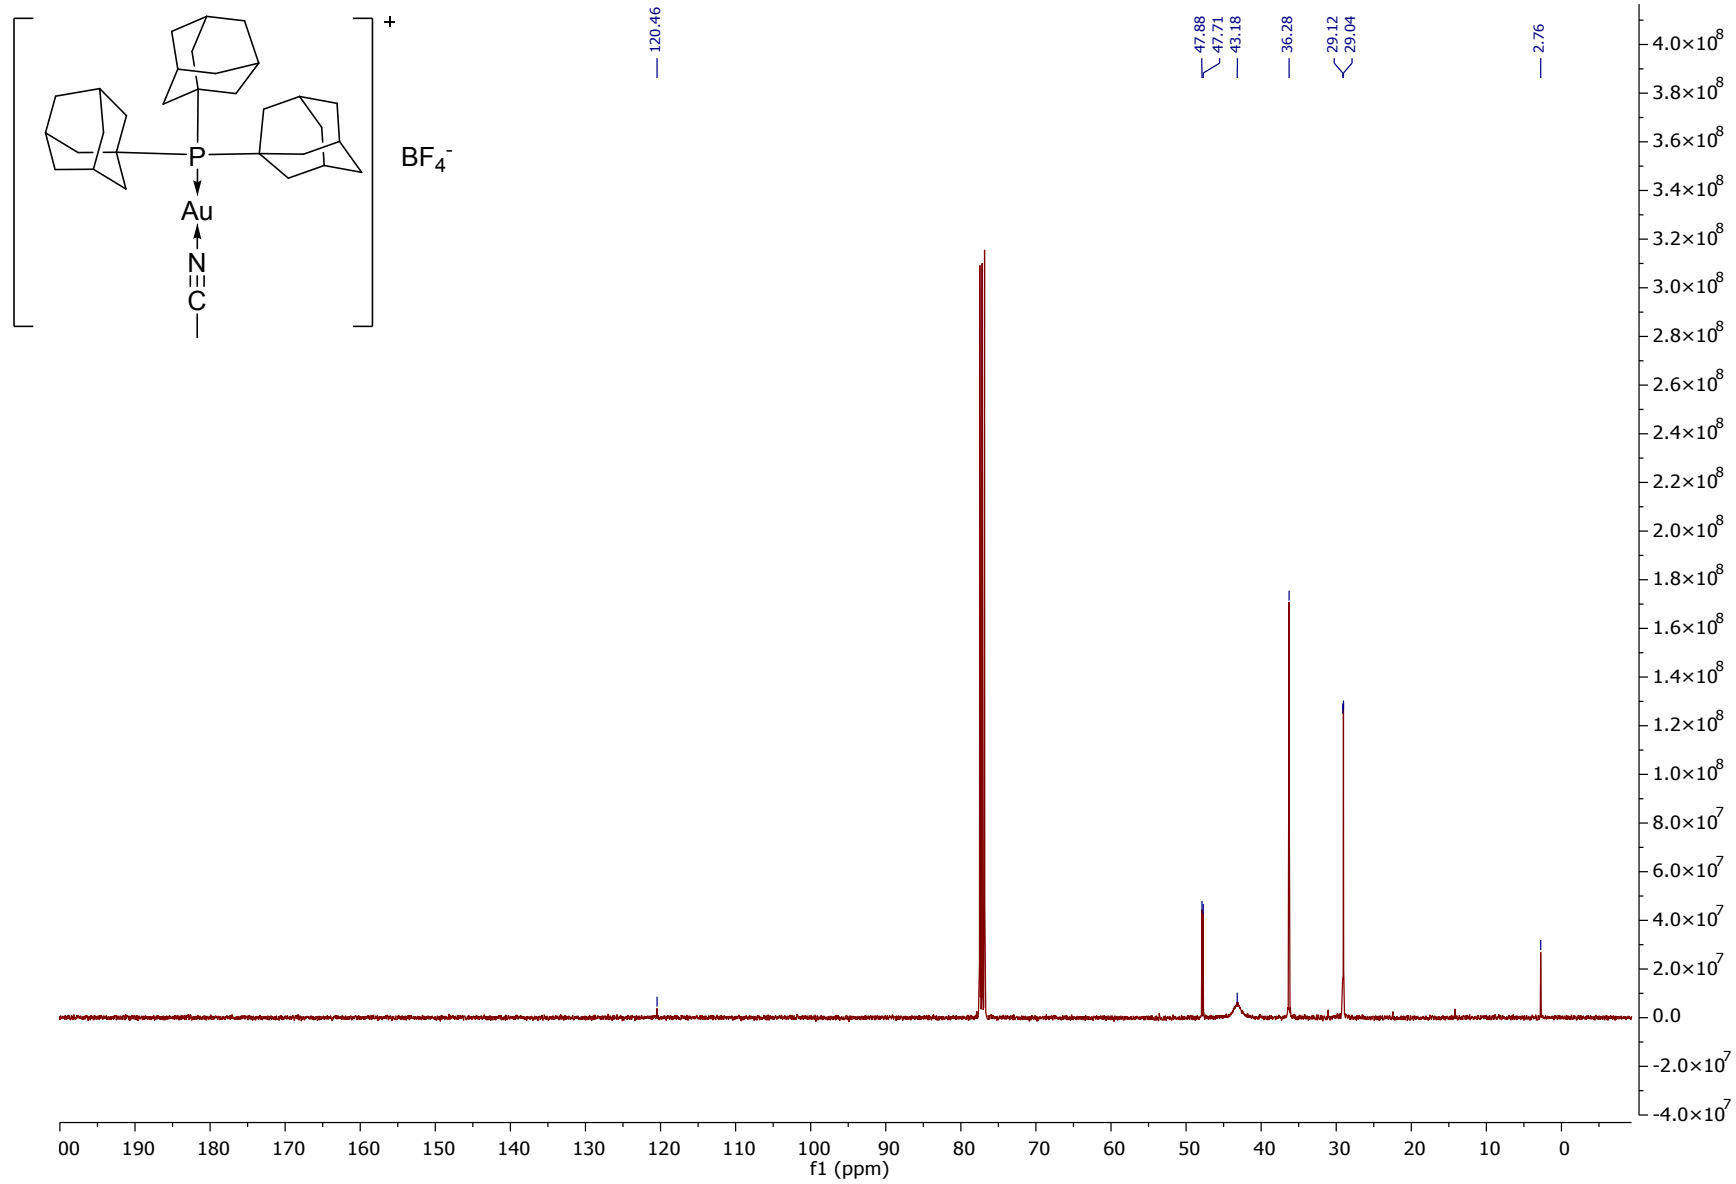

[Au(PAd<sub>3</sub>)(MeCN)]BF<sub>4</sub> (**7**) <sup>31</sup>P NMR spectrum

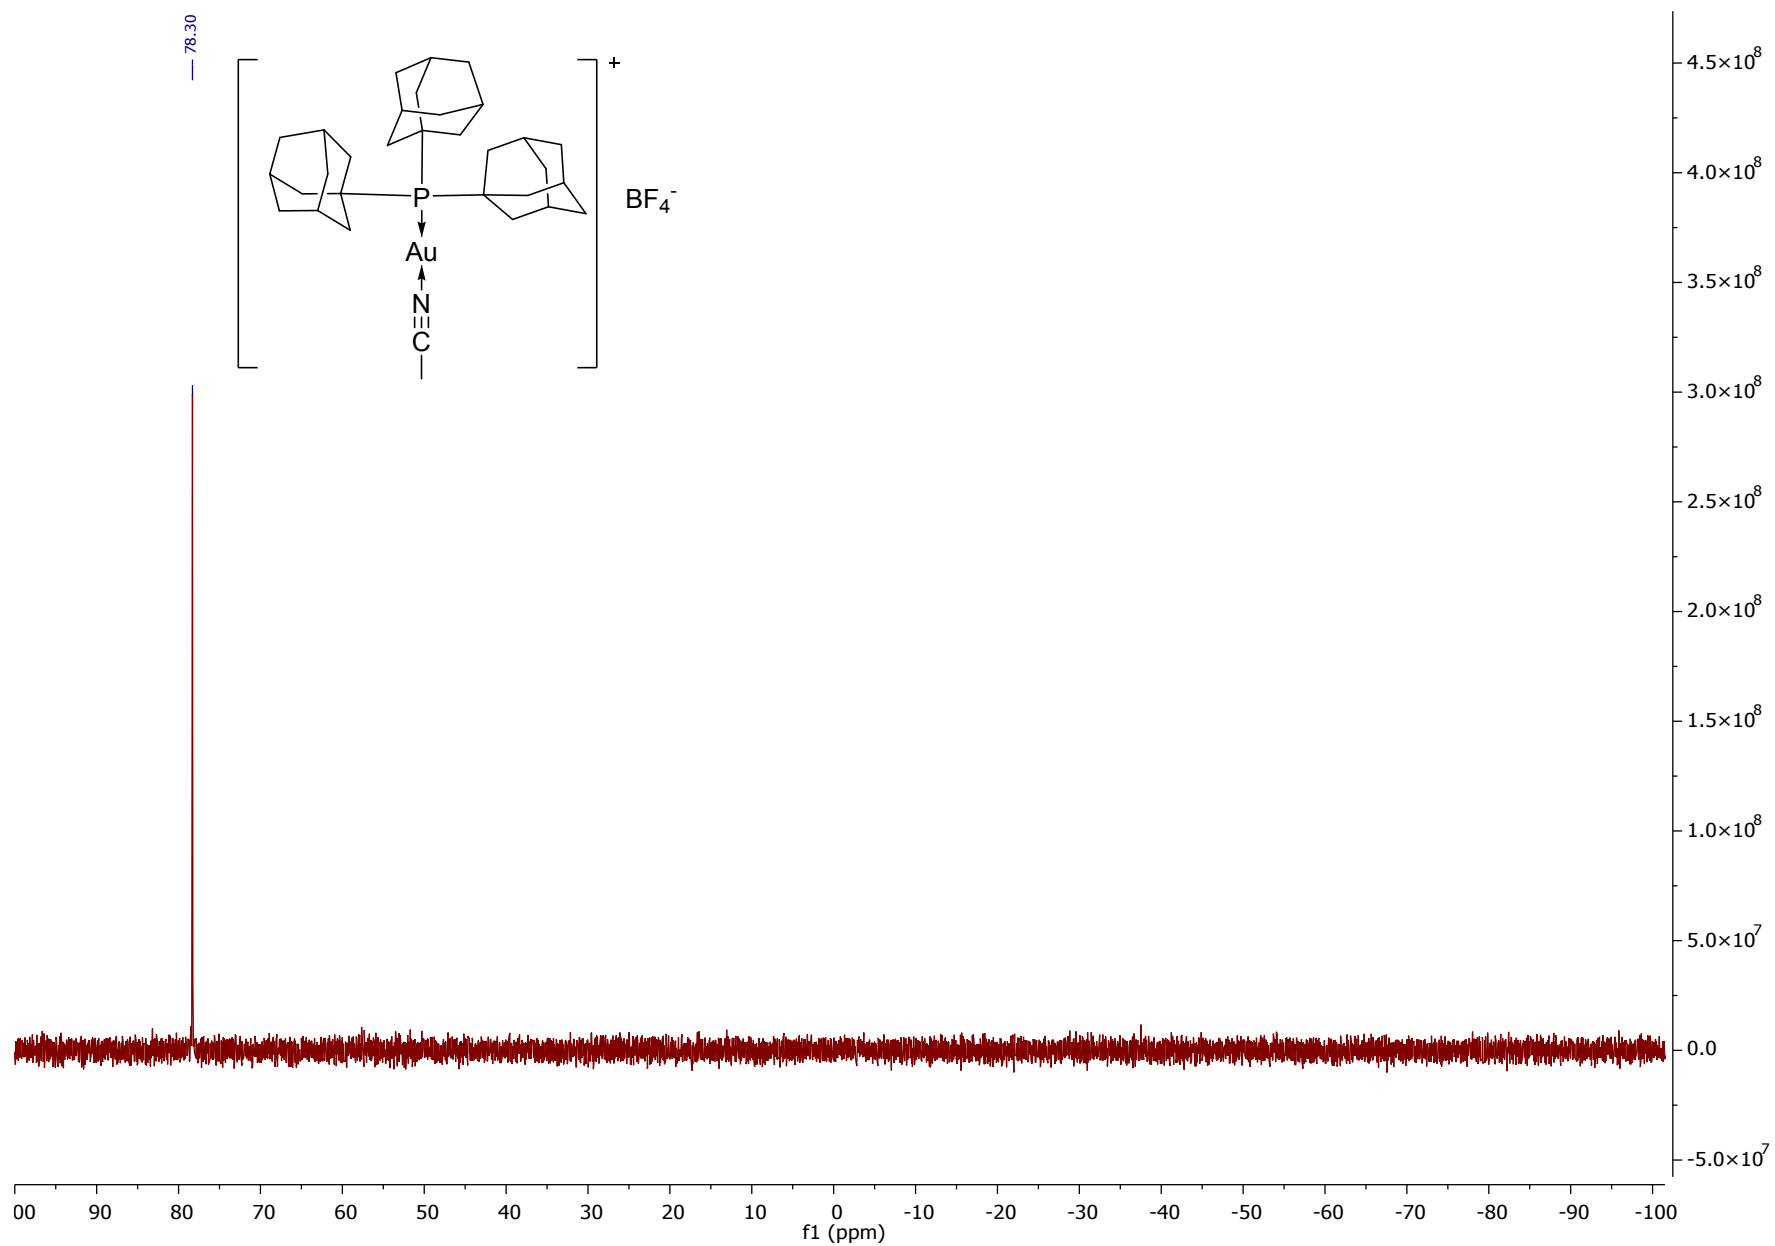

[Au(PAd<sub>3</sub>)(MeCN)]BF<sub>4</sub> (**7**) <sup>19</sup>F NMR spectrum

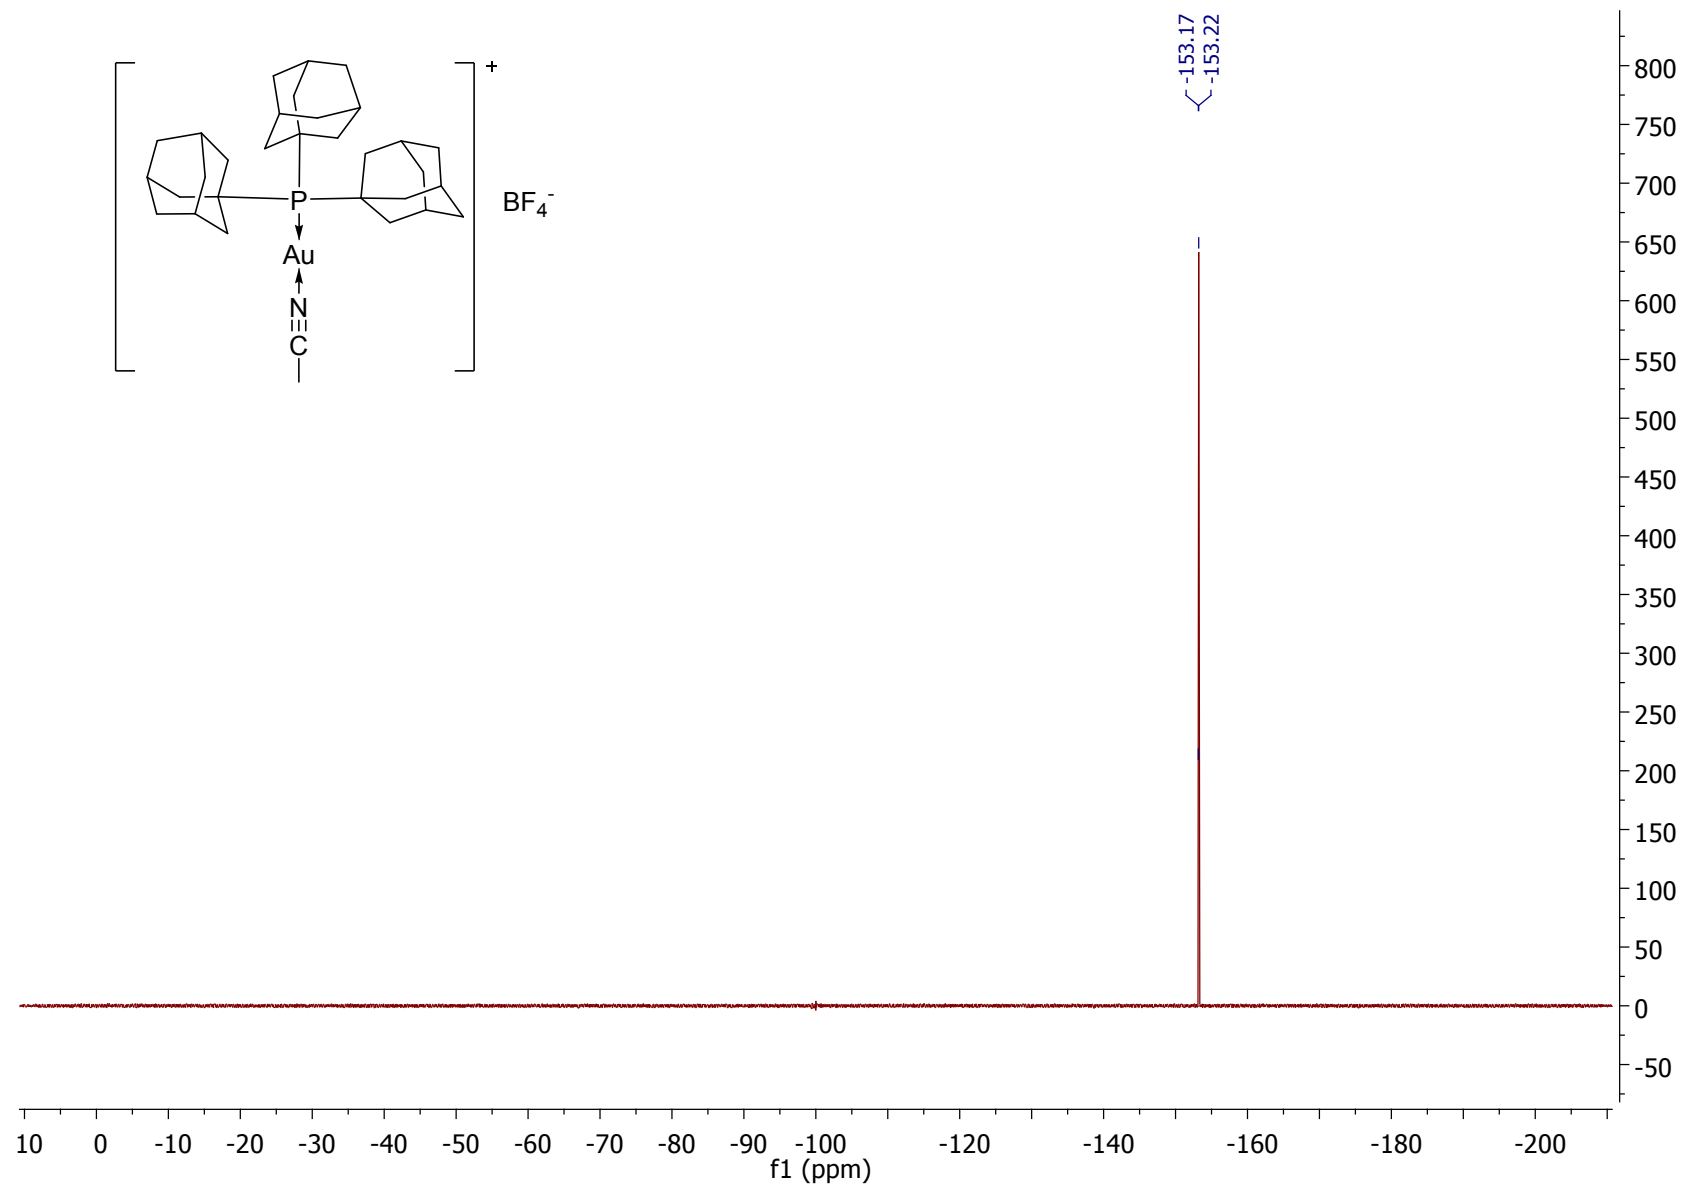

[Au(PAd<sub>3</sub>)Ph] (**8**) <sup>1</sup>H NMR spectrum

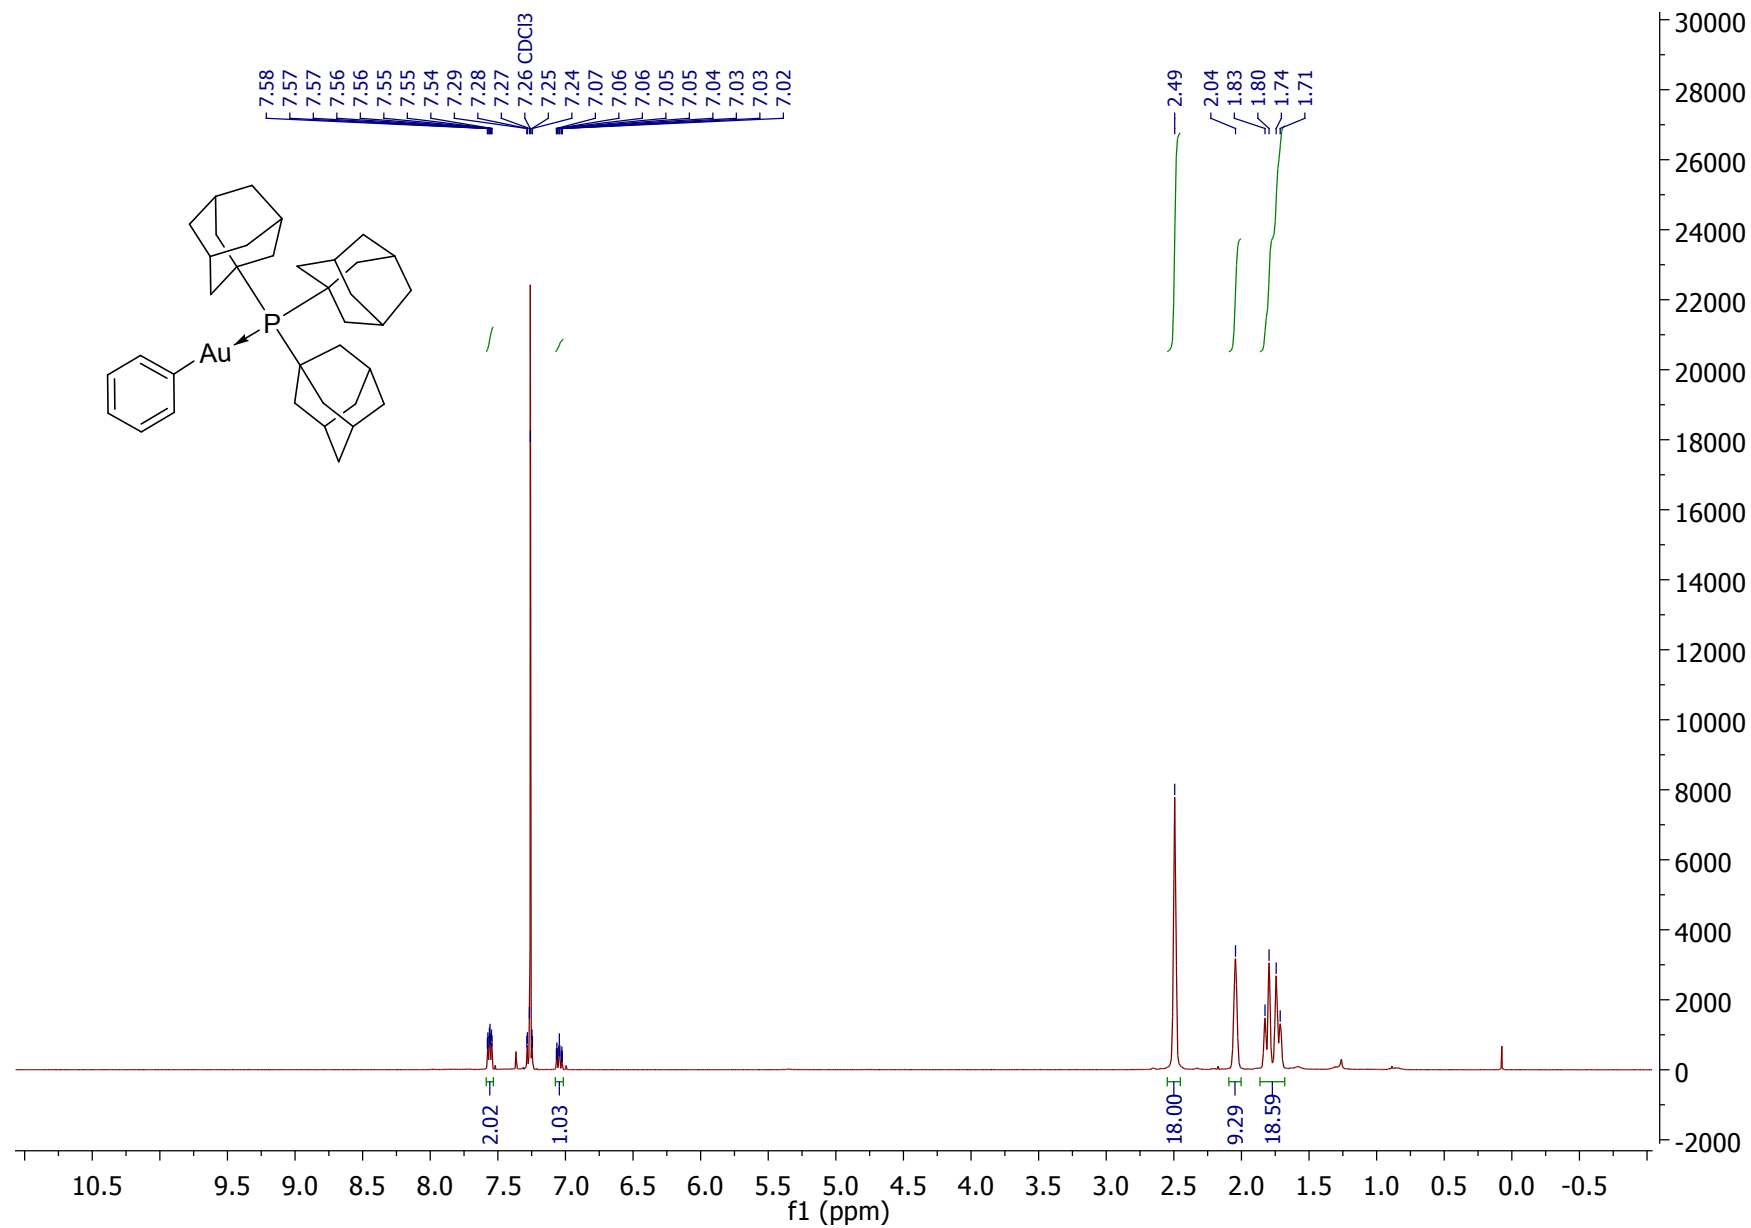

[Au(PAd<sub>3</sub>)Ph] (**8**) <sup>13</sup>C NMR spectrum

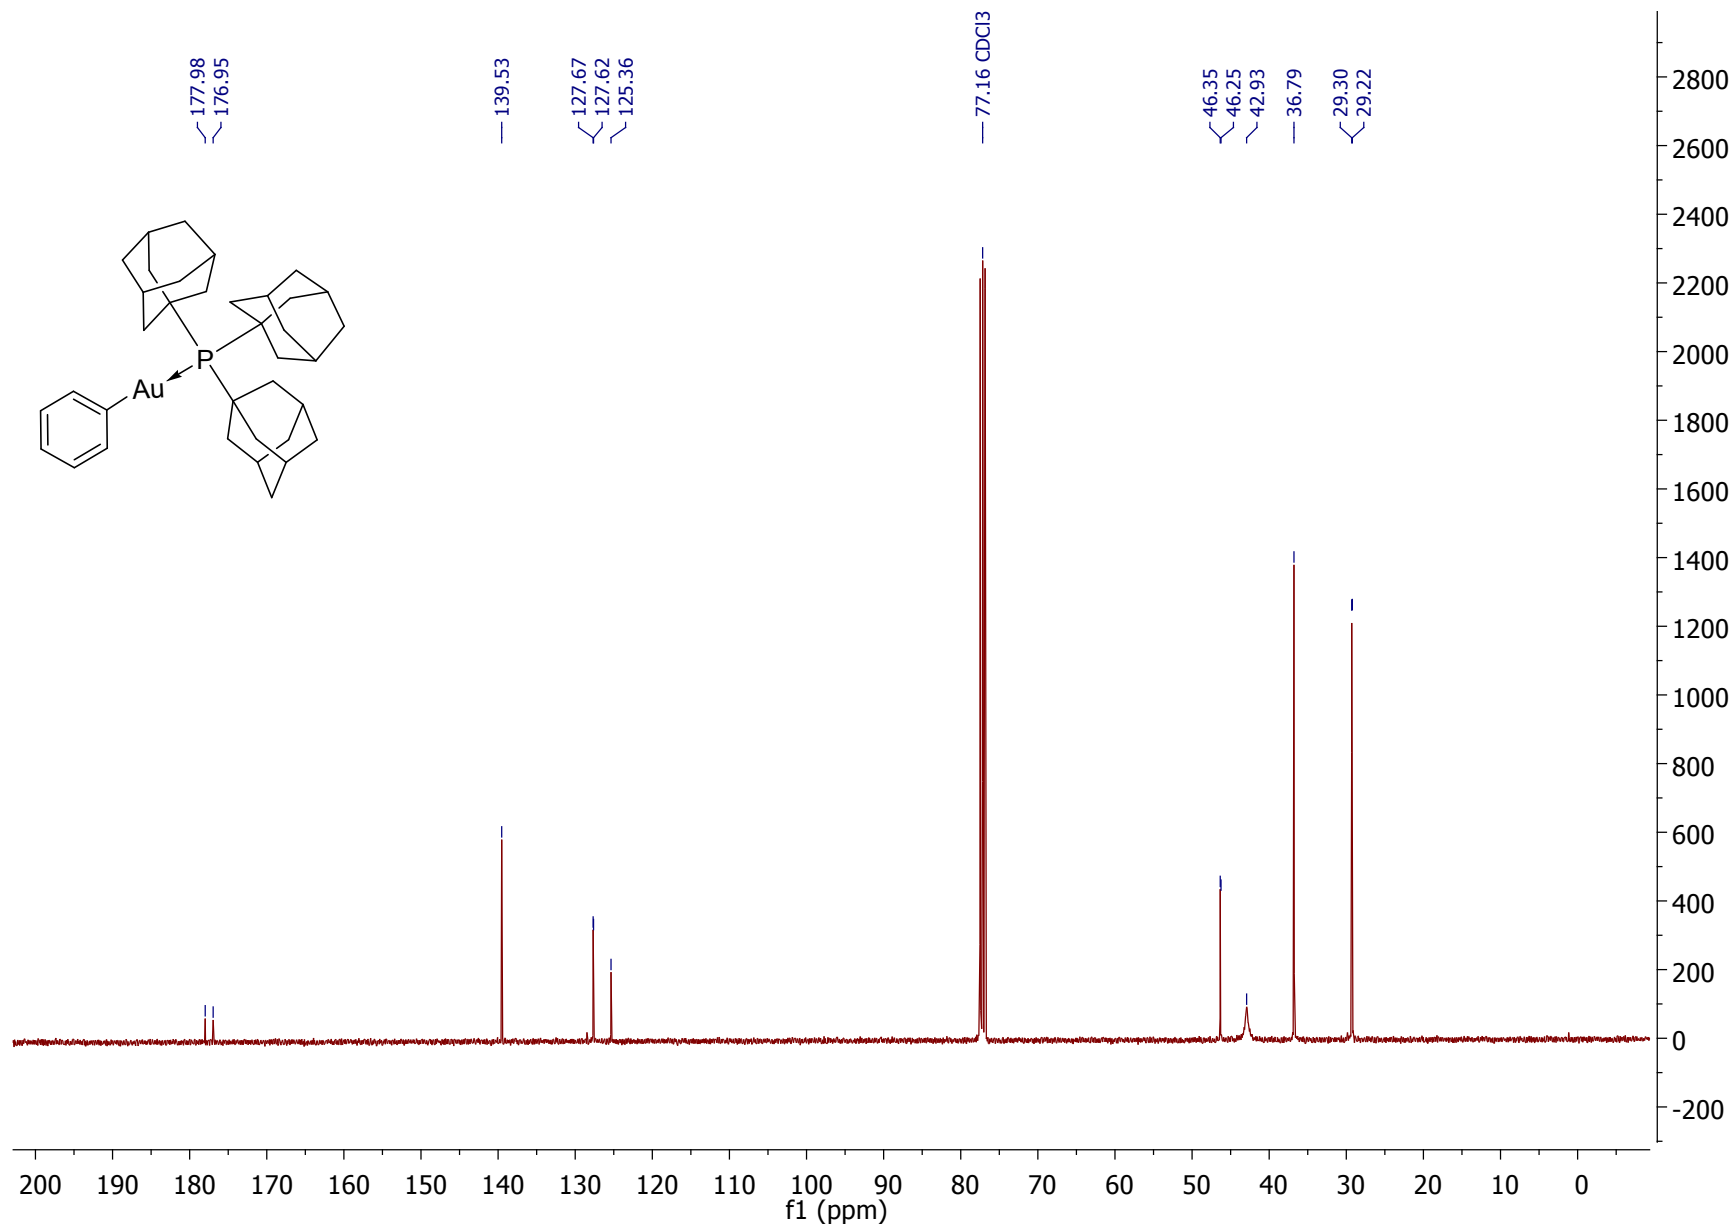

[Au(PAd<sub>3</sub>)Ph] (**8**) <sup>31</sup>P NMR spectrum

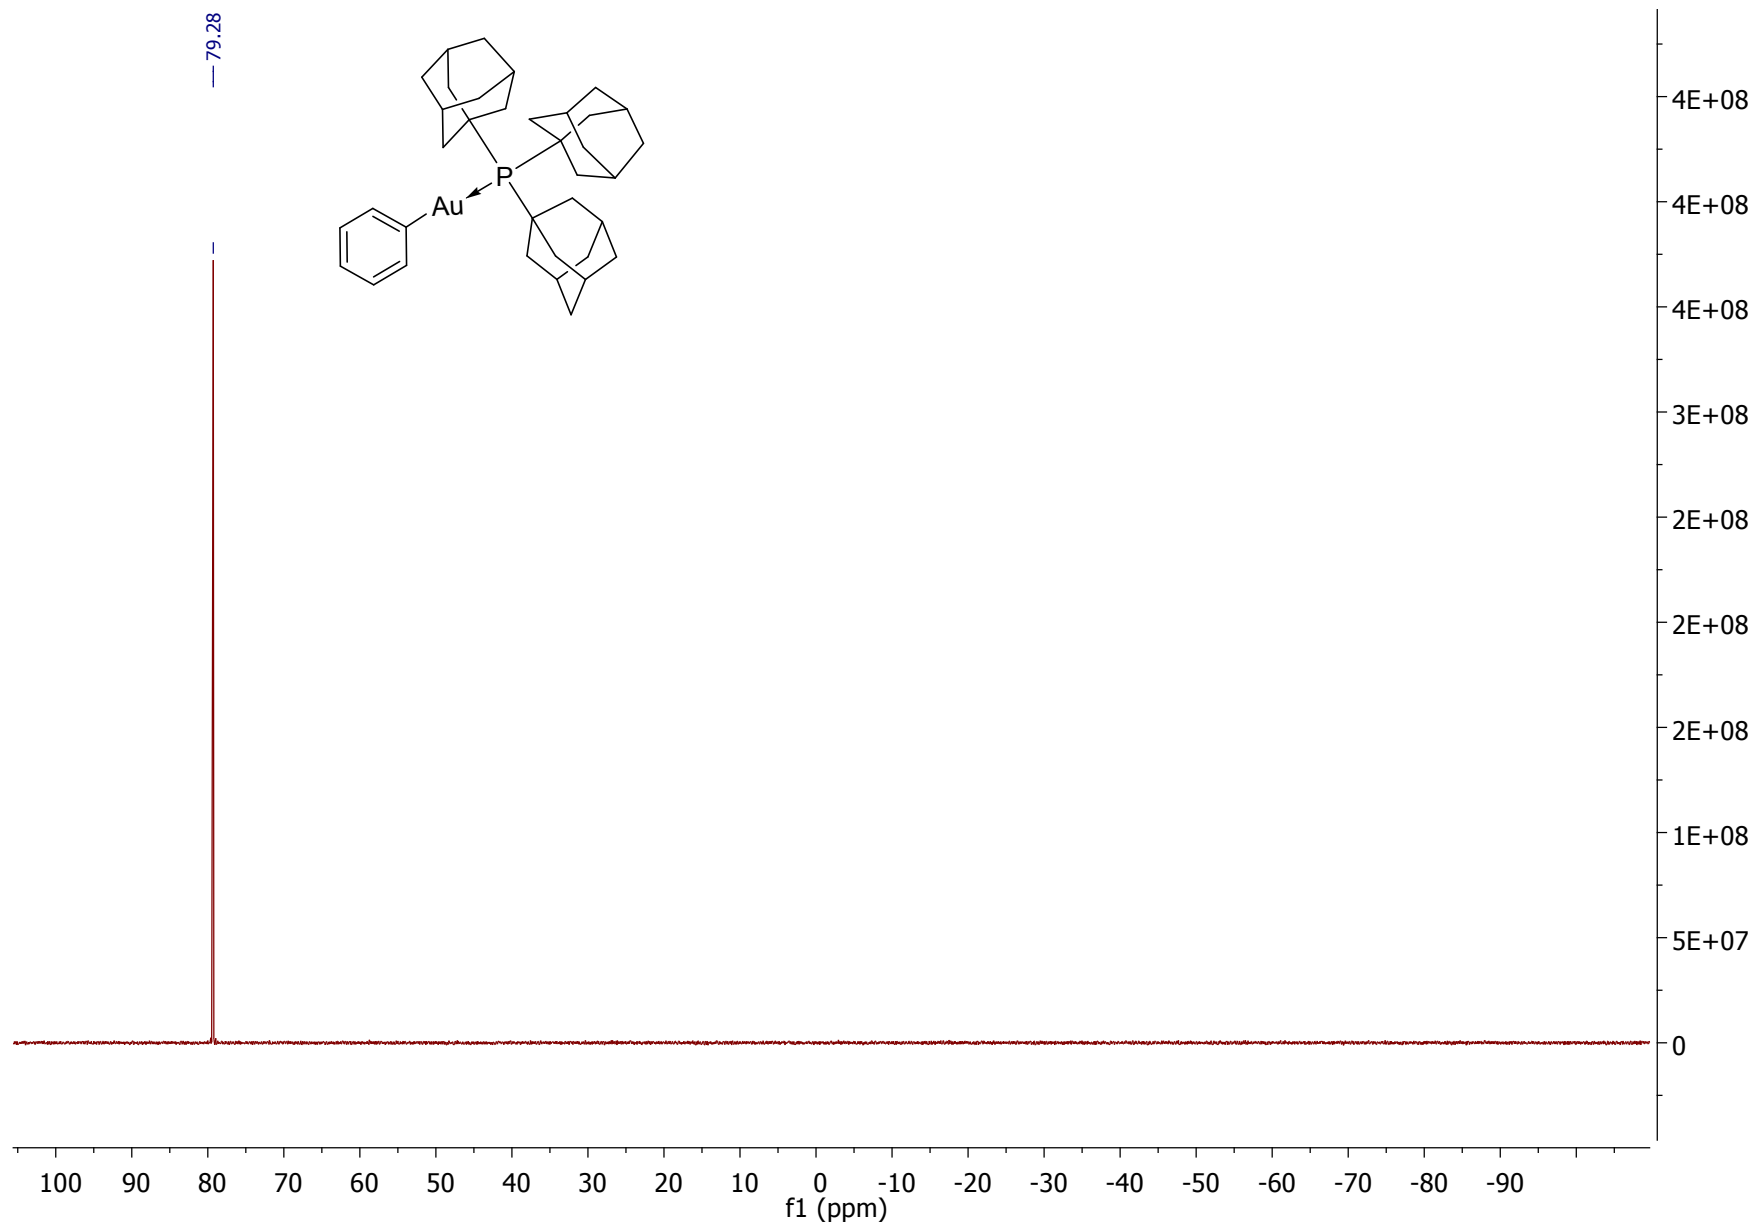



[Au(PAd<sub>3</sub>)(p-CF<sub>3</sub>Ph)] (9) <sup>1</sup>H NMR spectrum

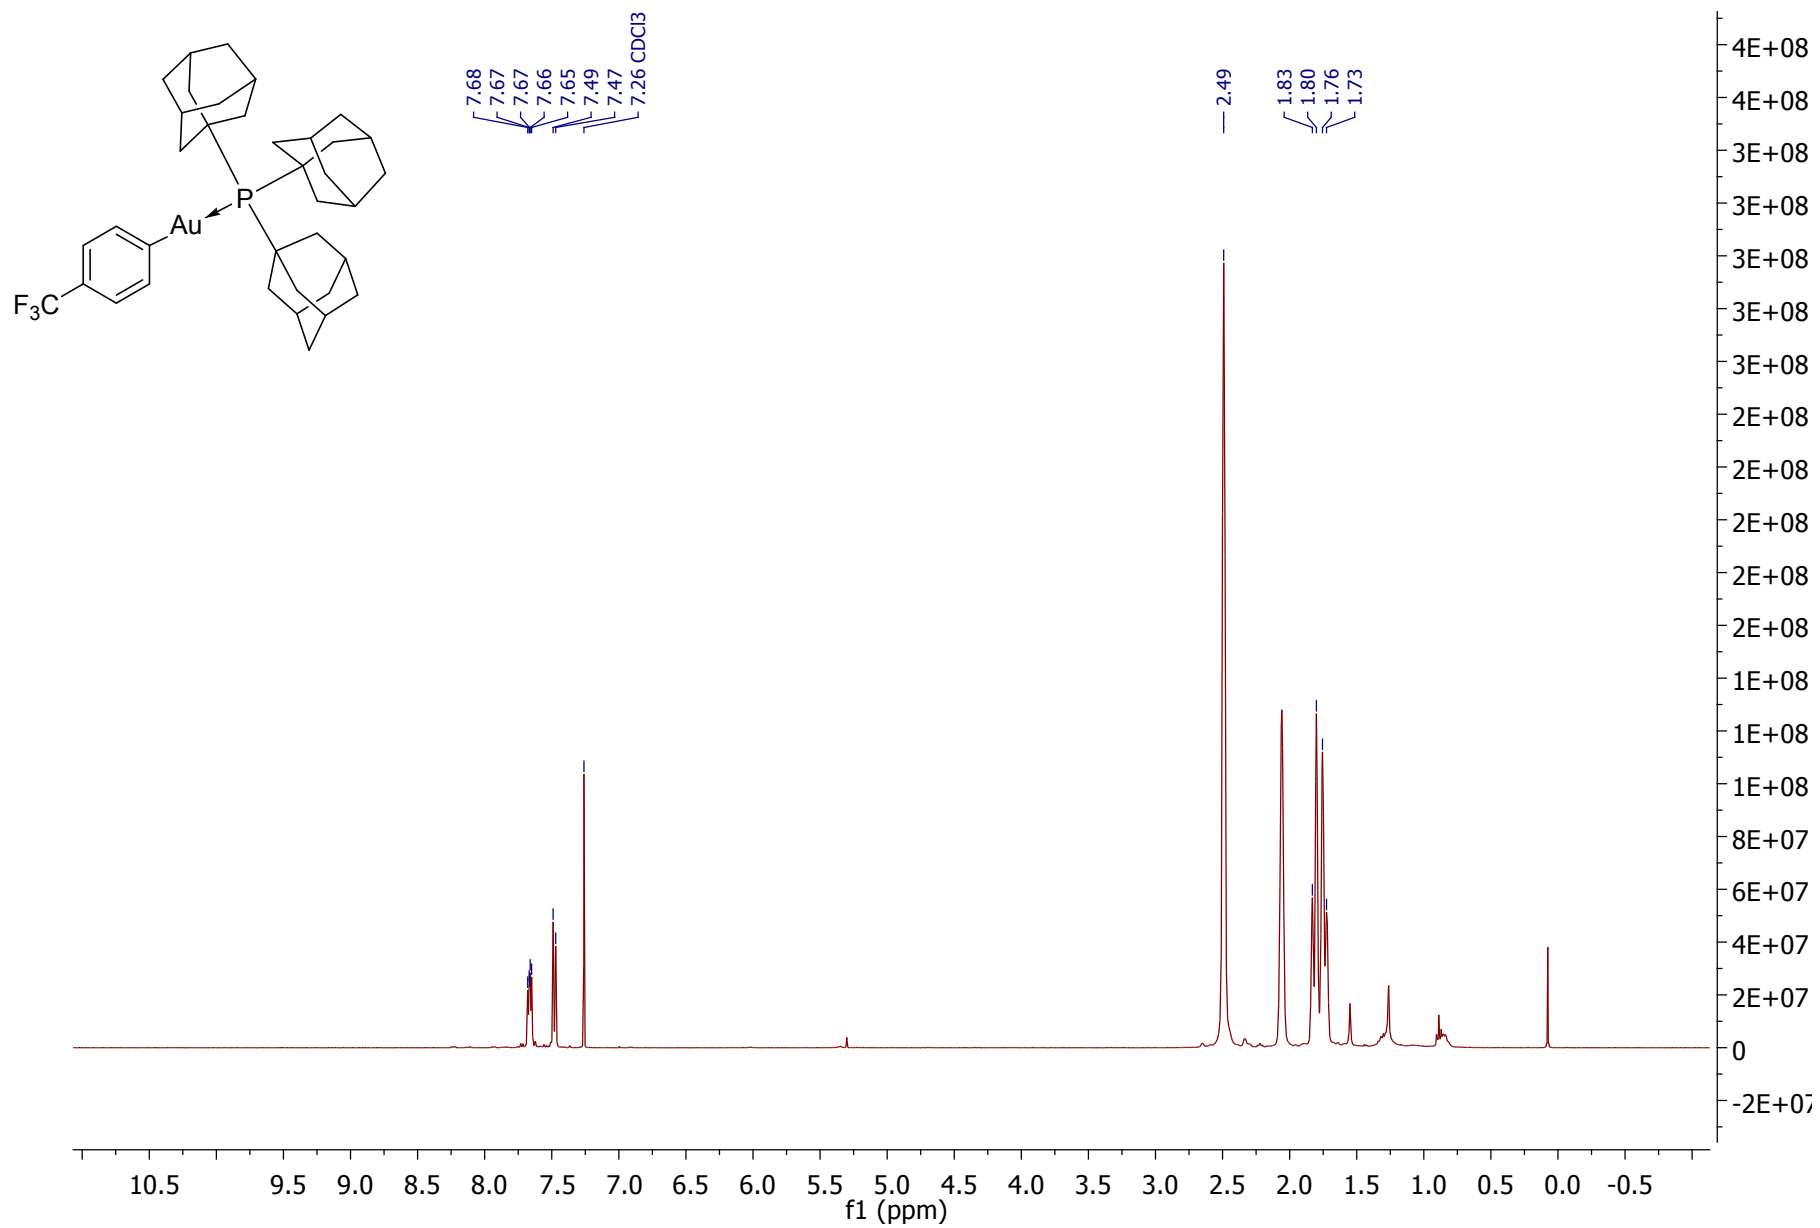

[Au(PAd<sub>3</sub>)(p-CF<sub>3</sub>Ph)] (9) <sup>13</sup>C NMR spectrum

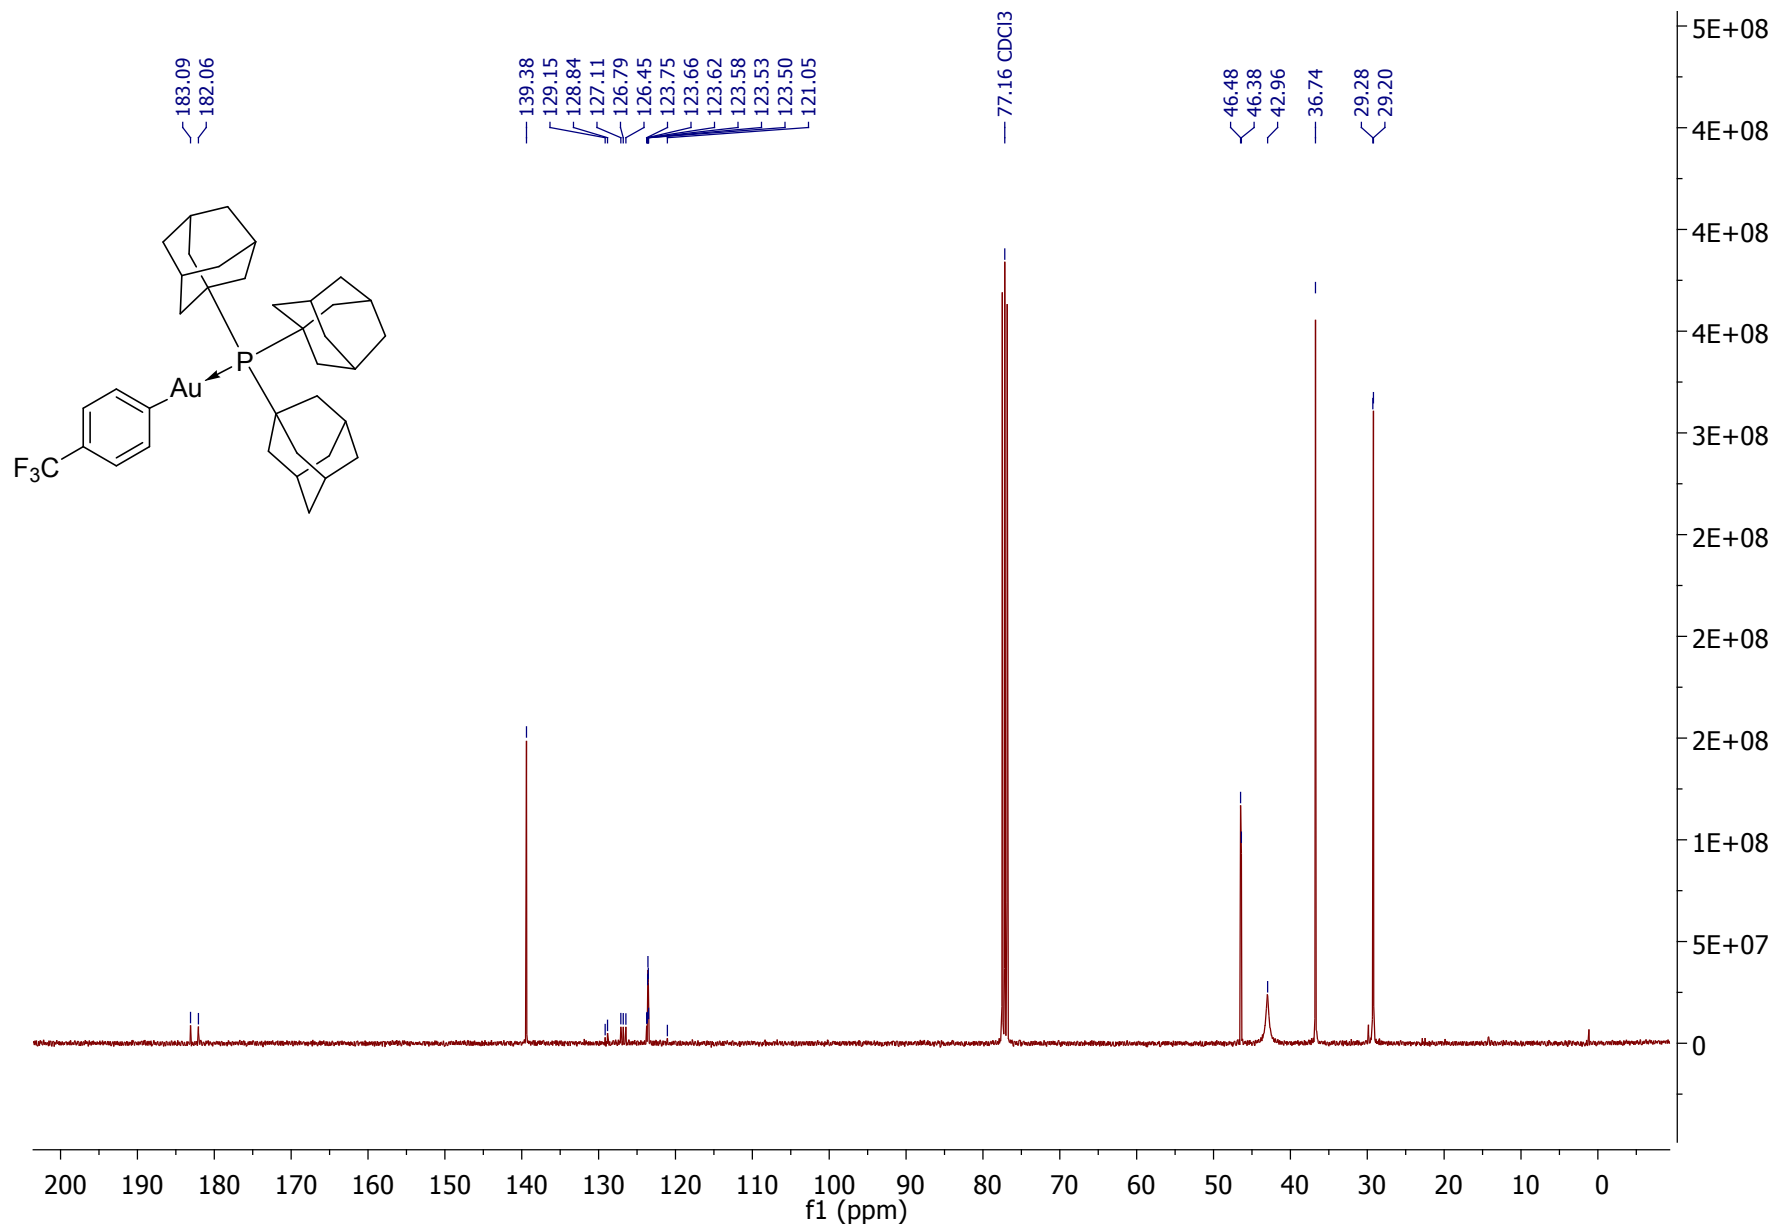

[Au(PAd<sub>3</sub>)(p-CF<sub>3</sub>Ph)] (9) <sup>31</sup>P NMR spectrum

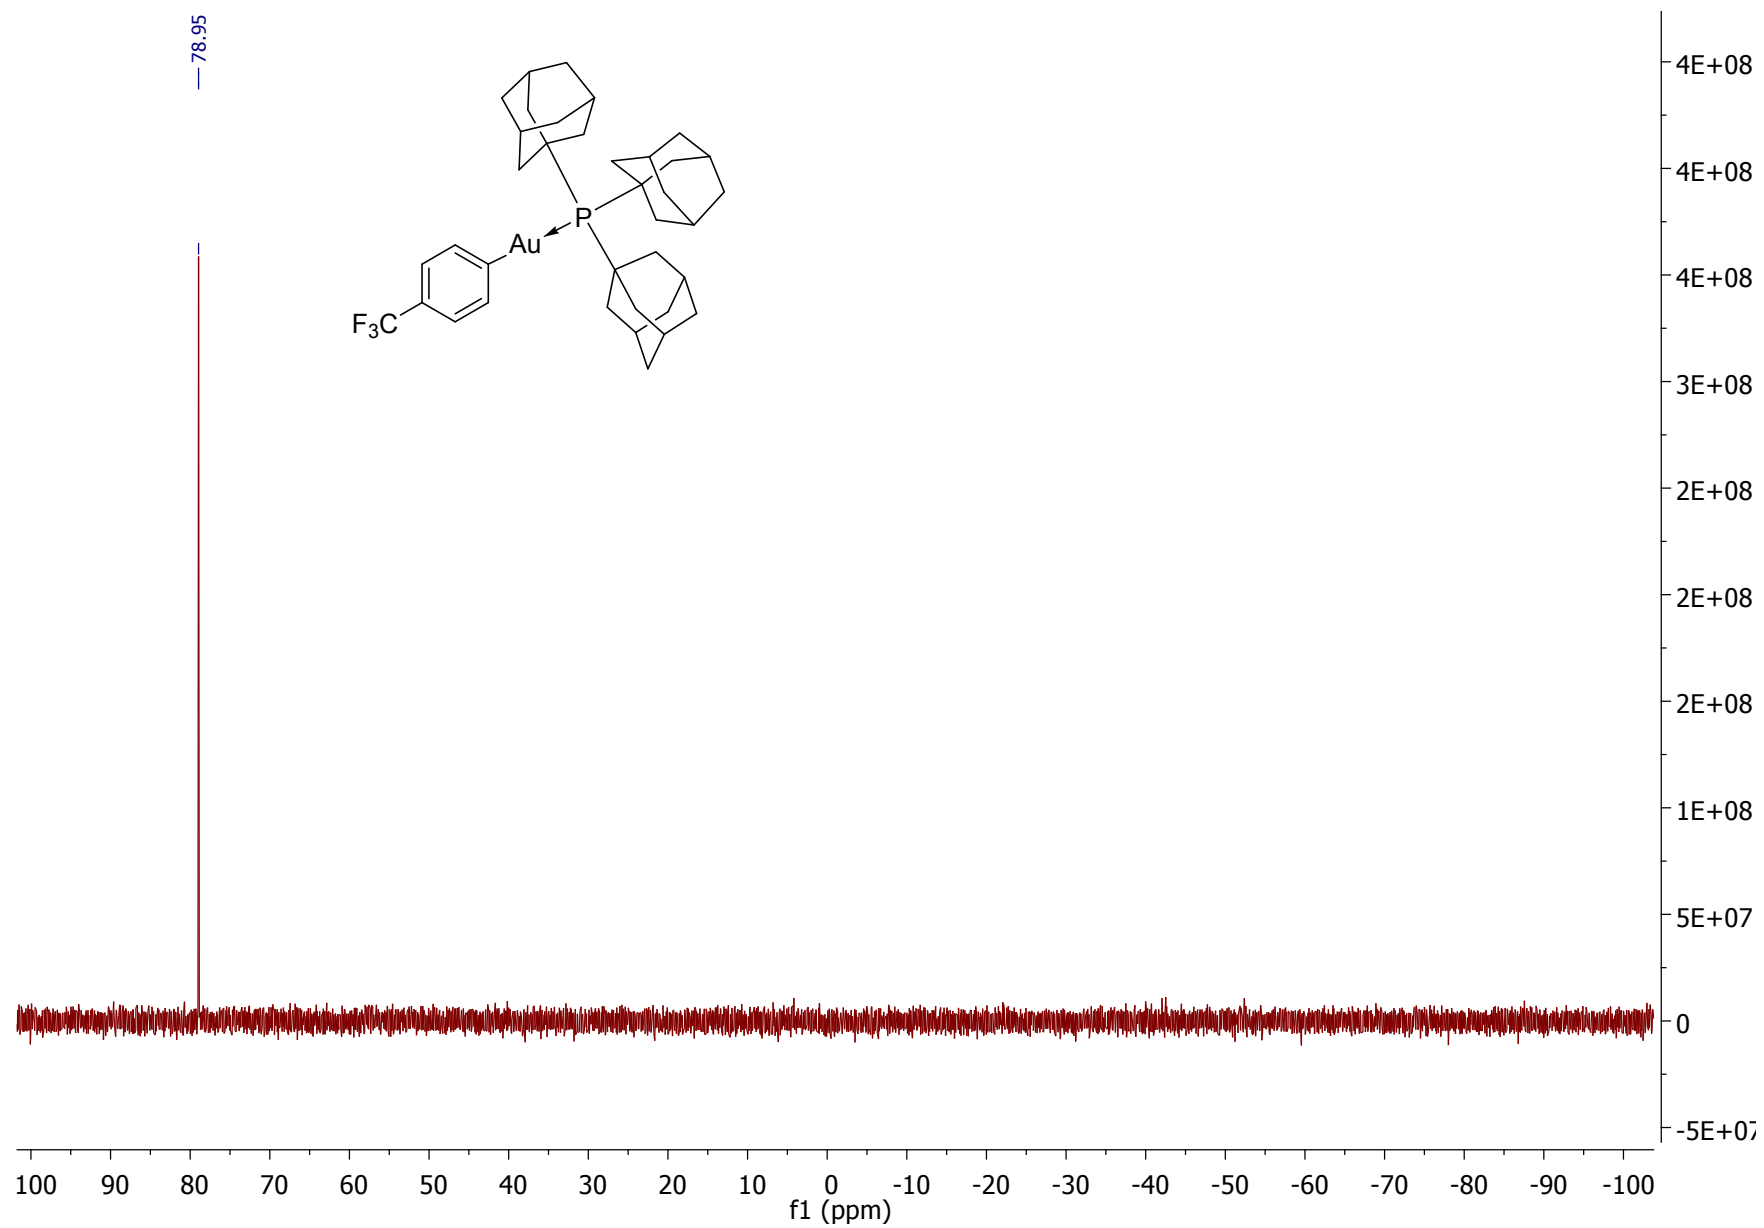

[Au(PAd<sub>3</sub>)(p-CF<sub>3</sub>Ph)] (9) <sup>19</sup>F NMR spectrum

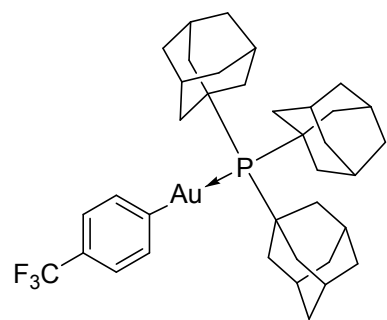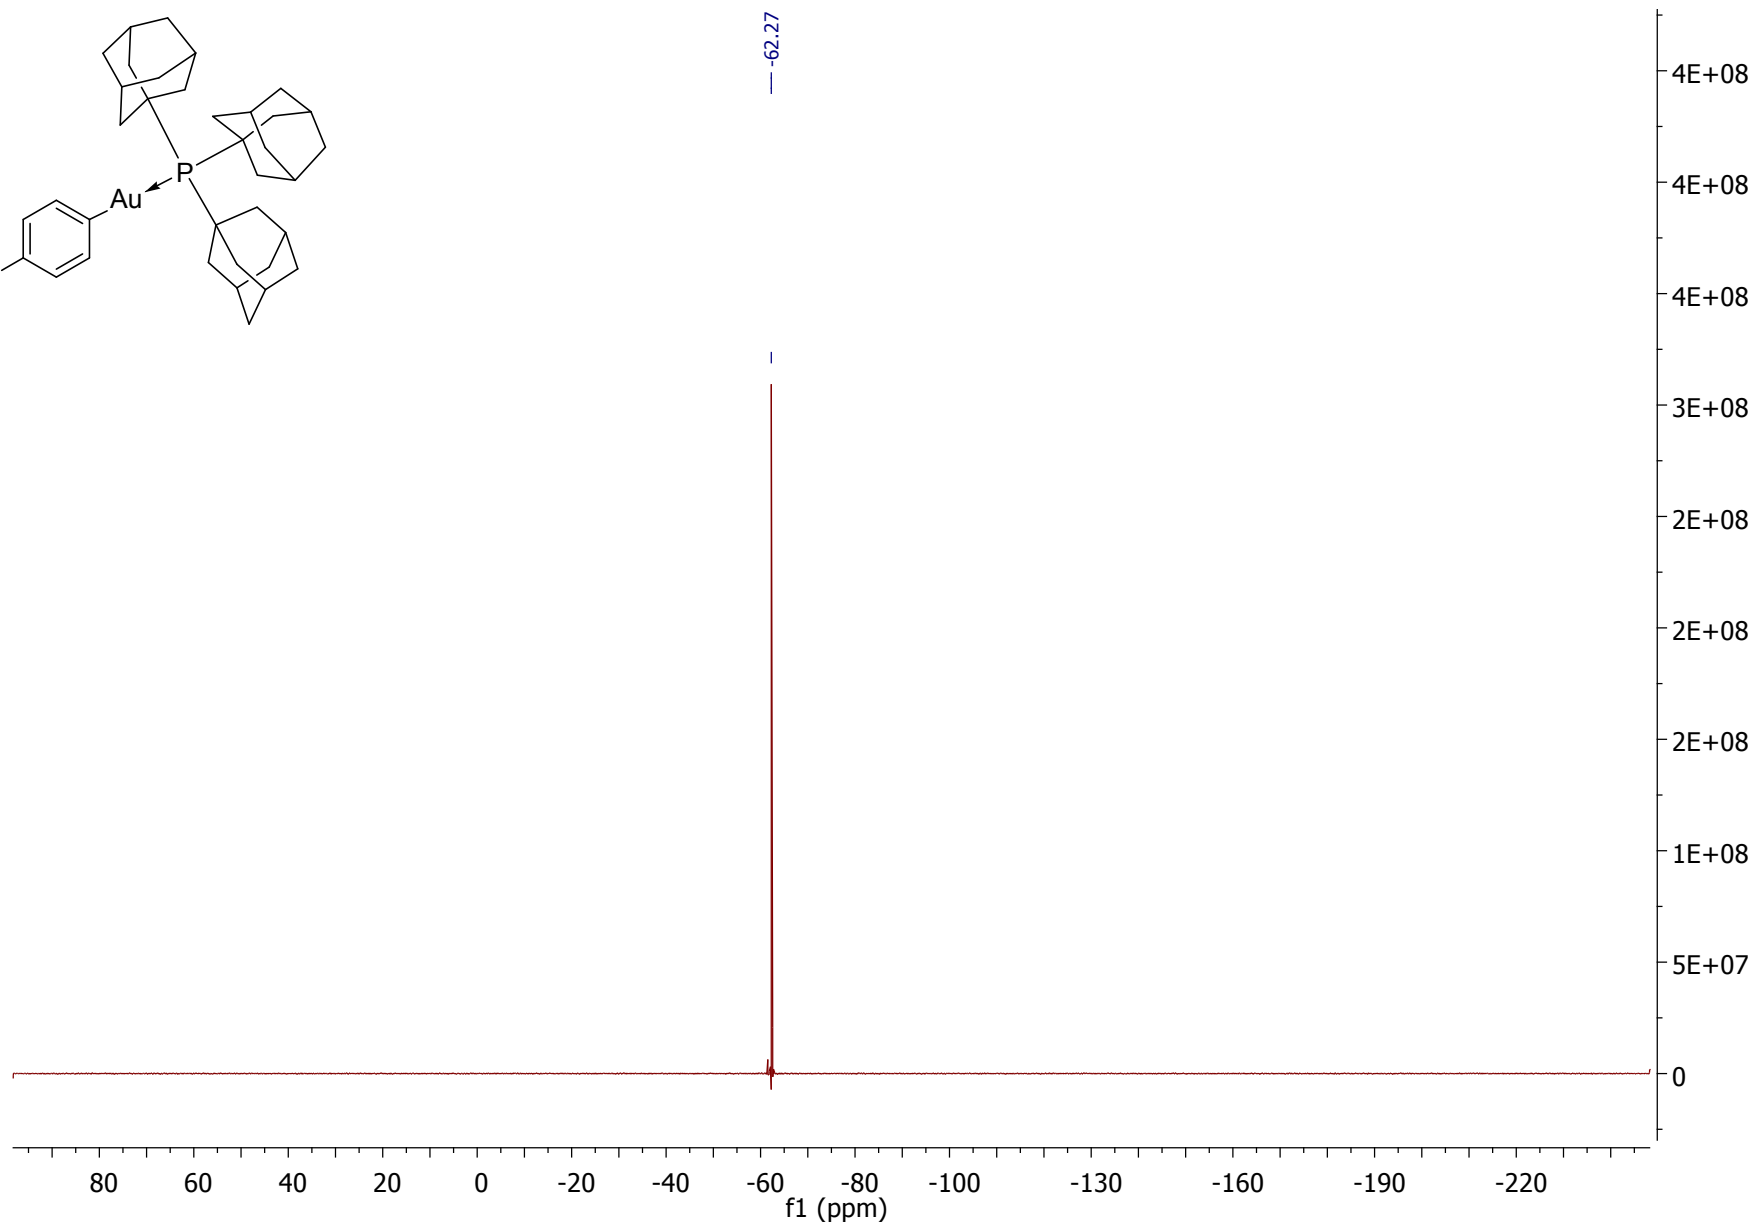

[Au(PAd<sub>3</sub>)(p-OMePh)] (**10**) <sup>1</sup>H NMR spectrum

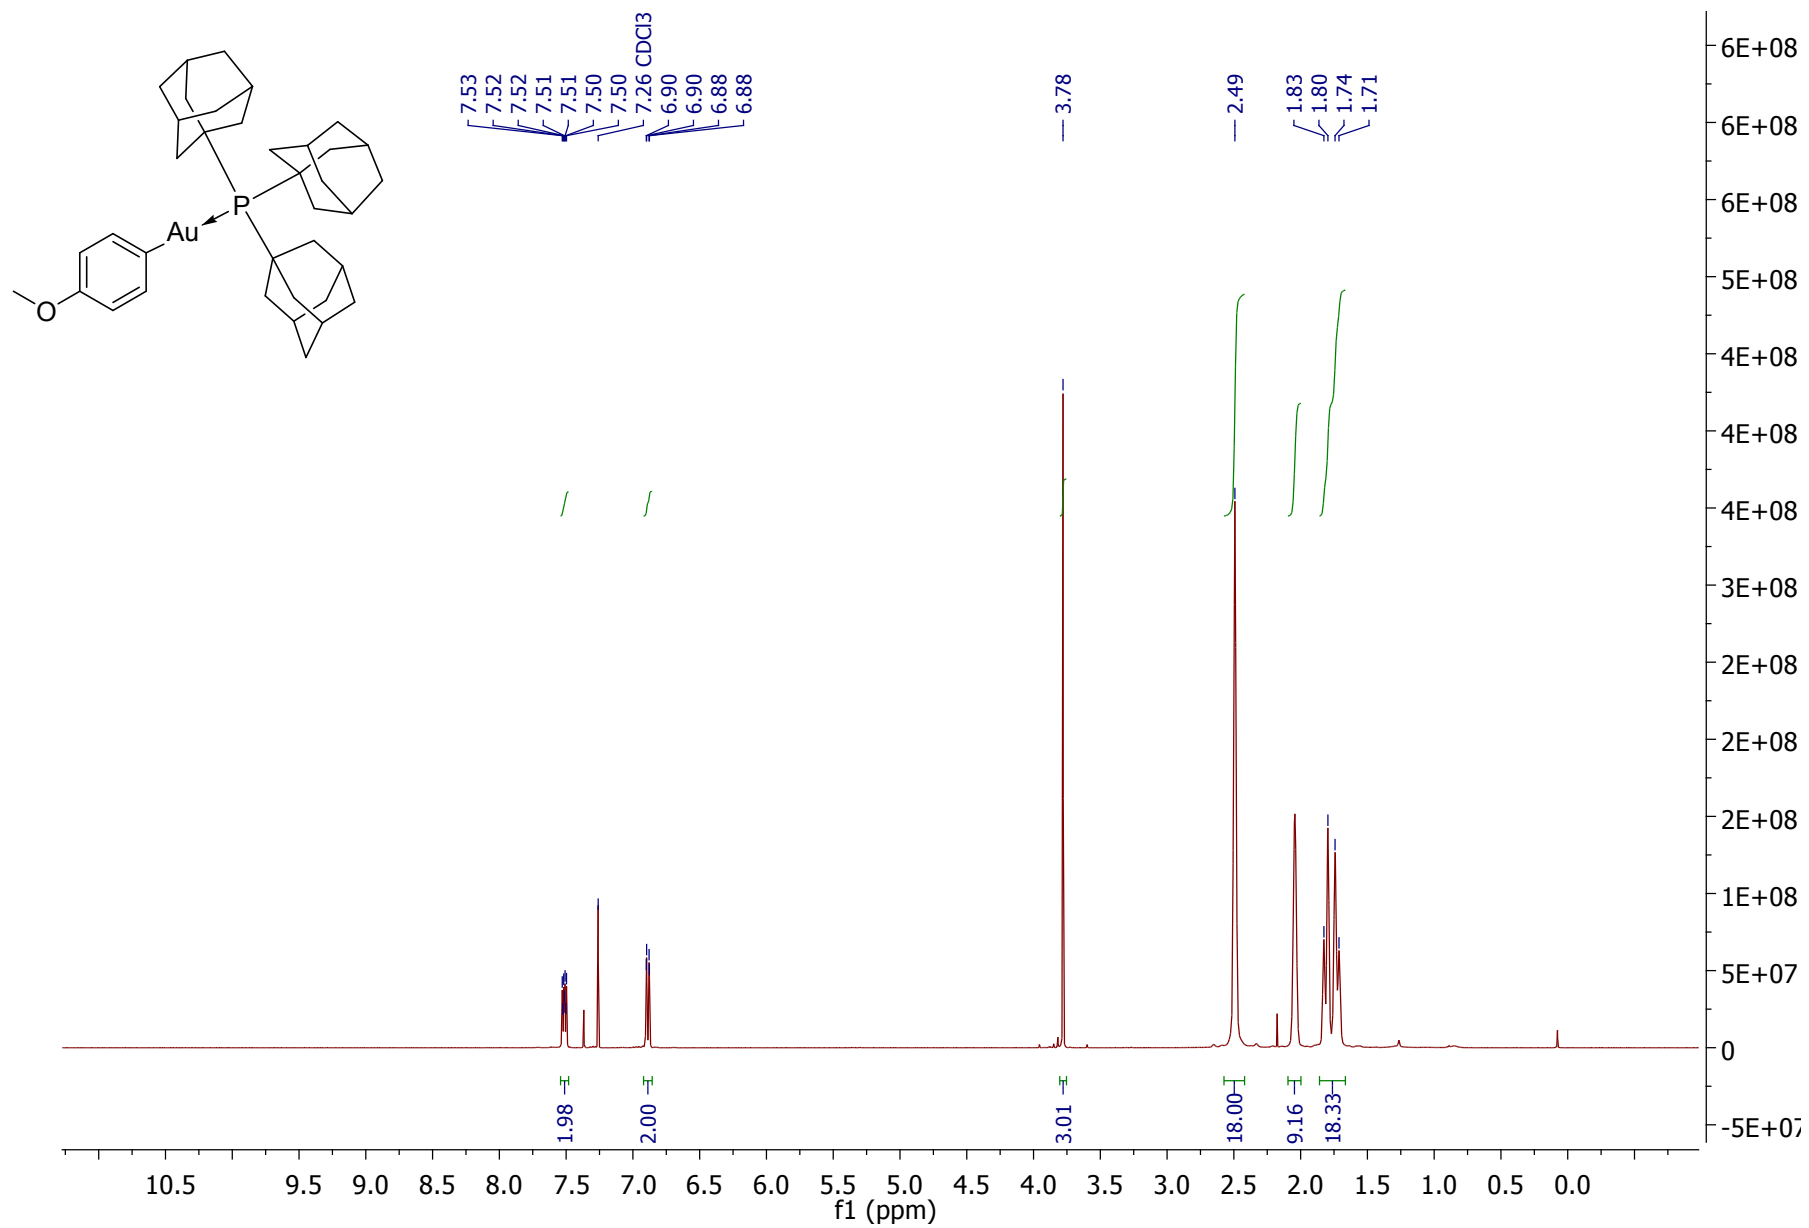

[Au(PAd<sub>3</sub>)(p-OMePh)] (**10**) <sup>13</sup>C NMR spectrum

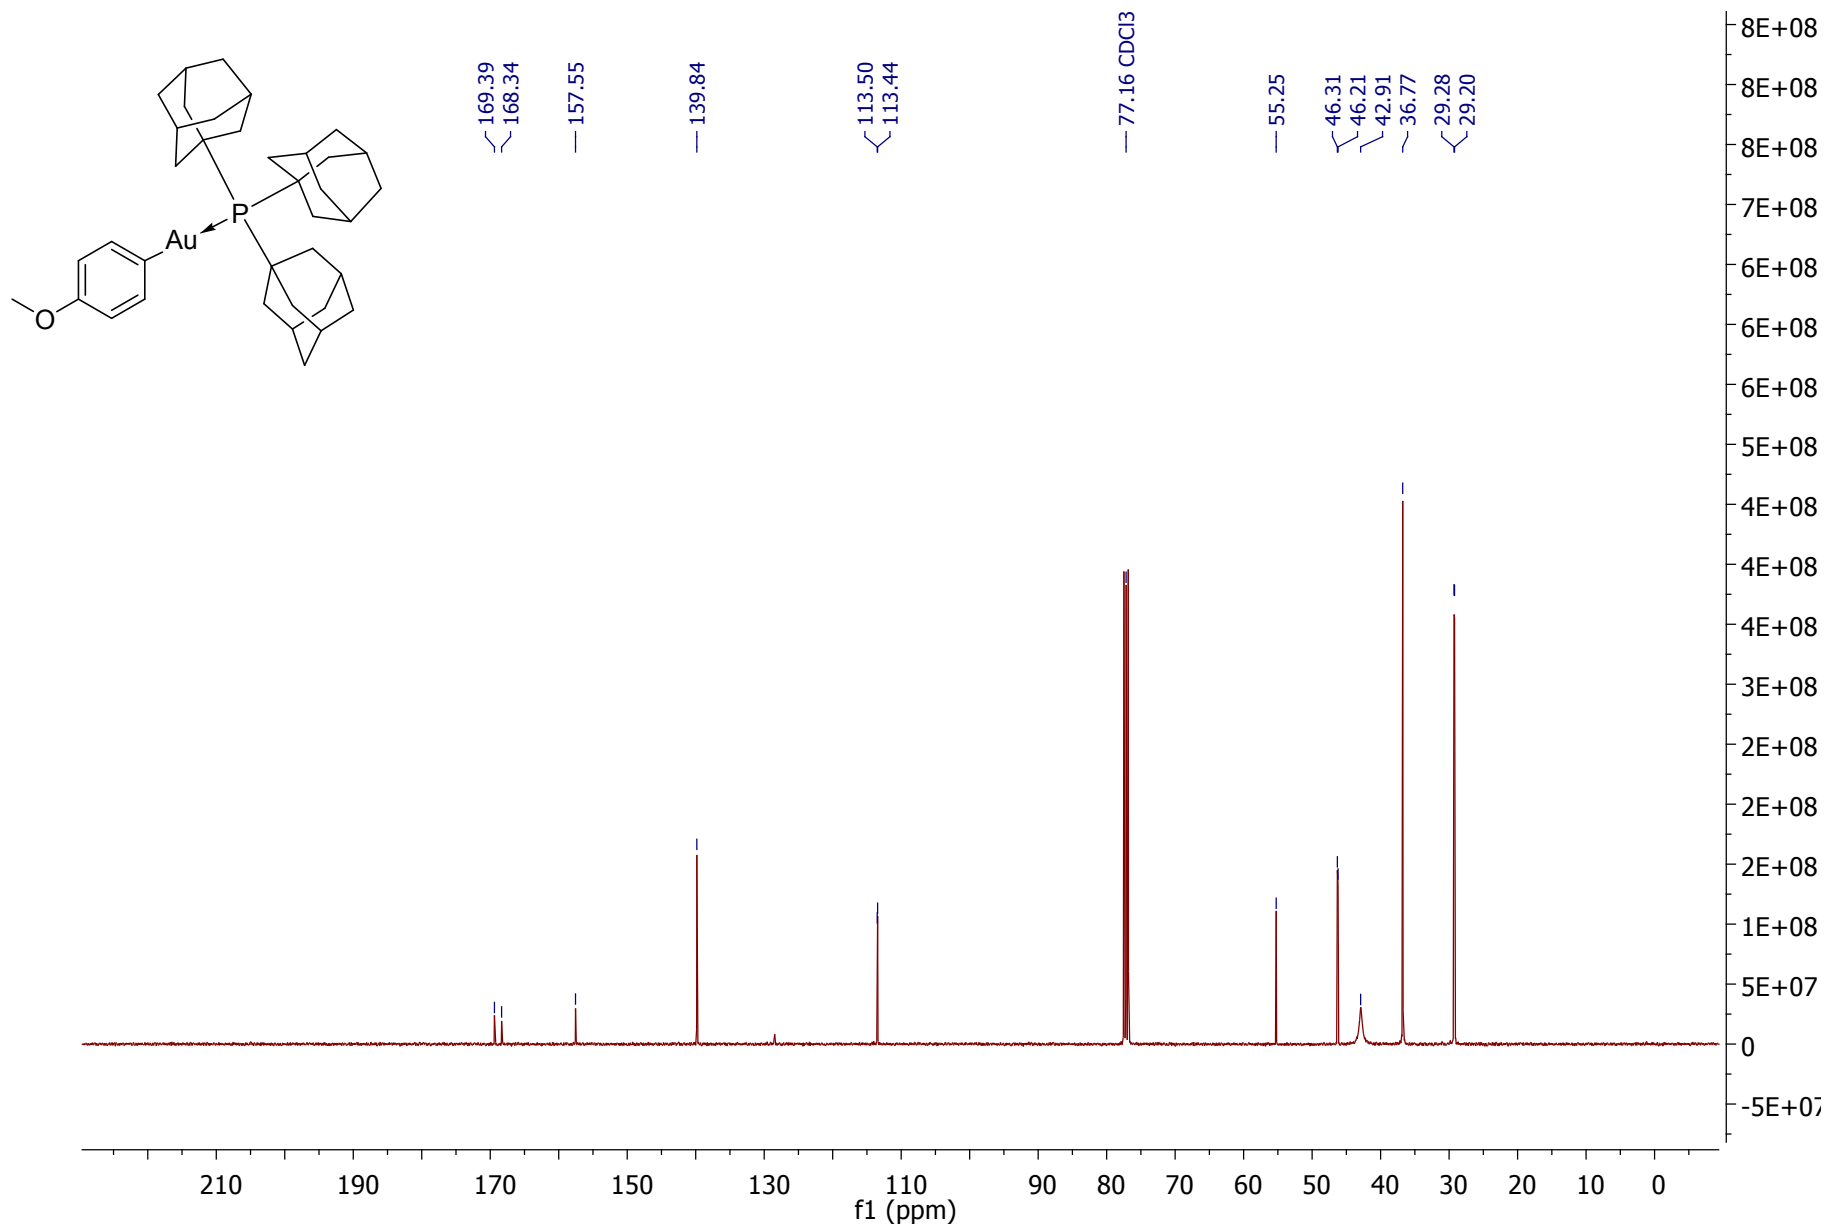

[Au(PAd<sub>3</sub>)(p-OMePh)] (**10**) <sup>31</sup>P NMR spectrum

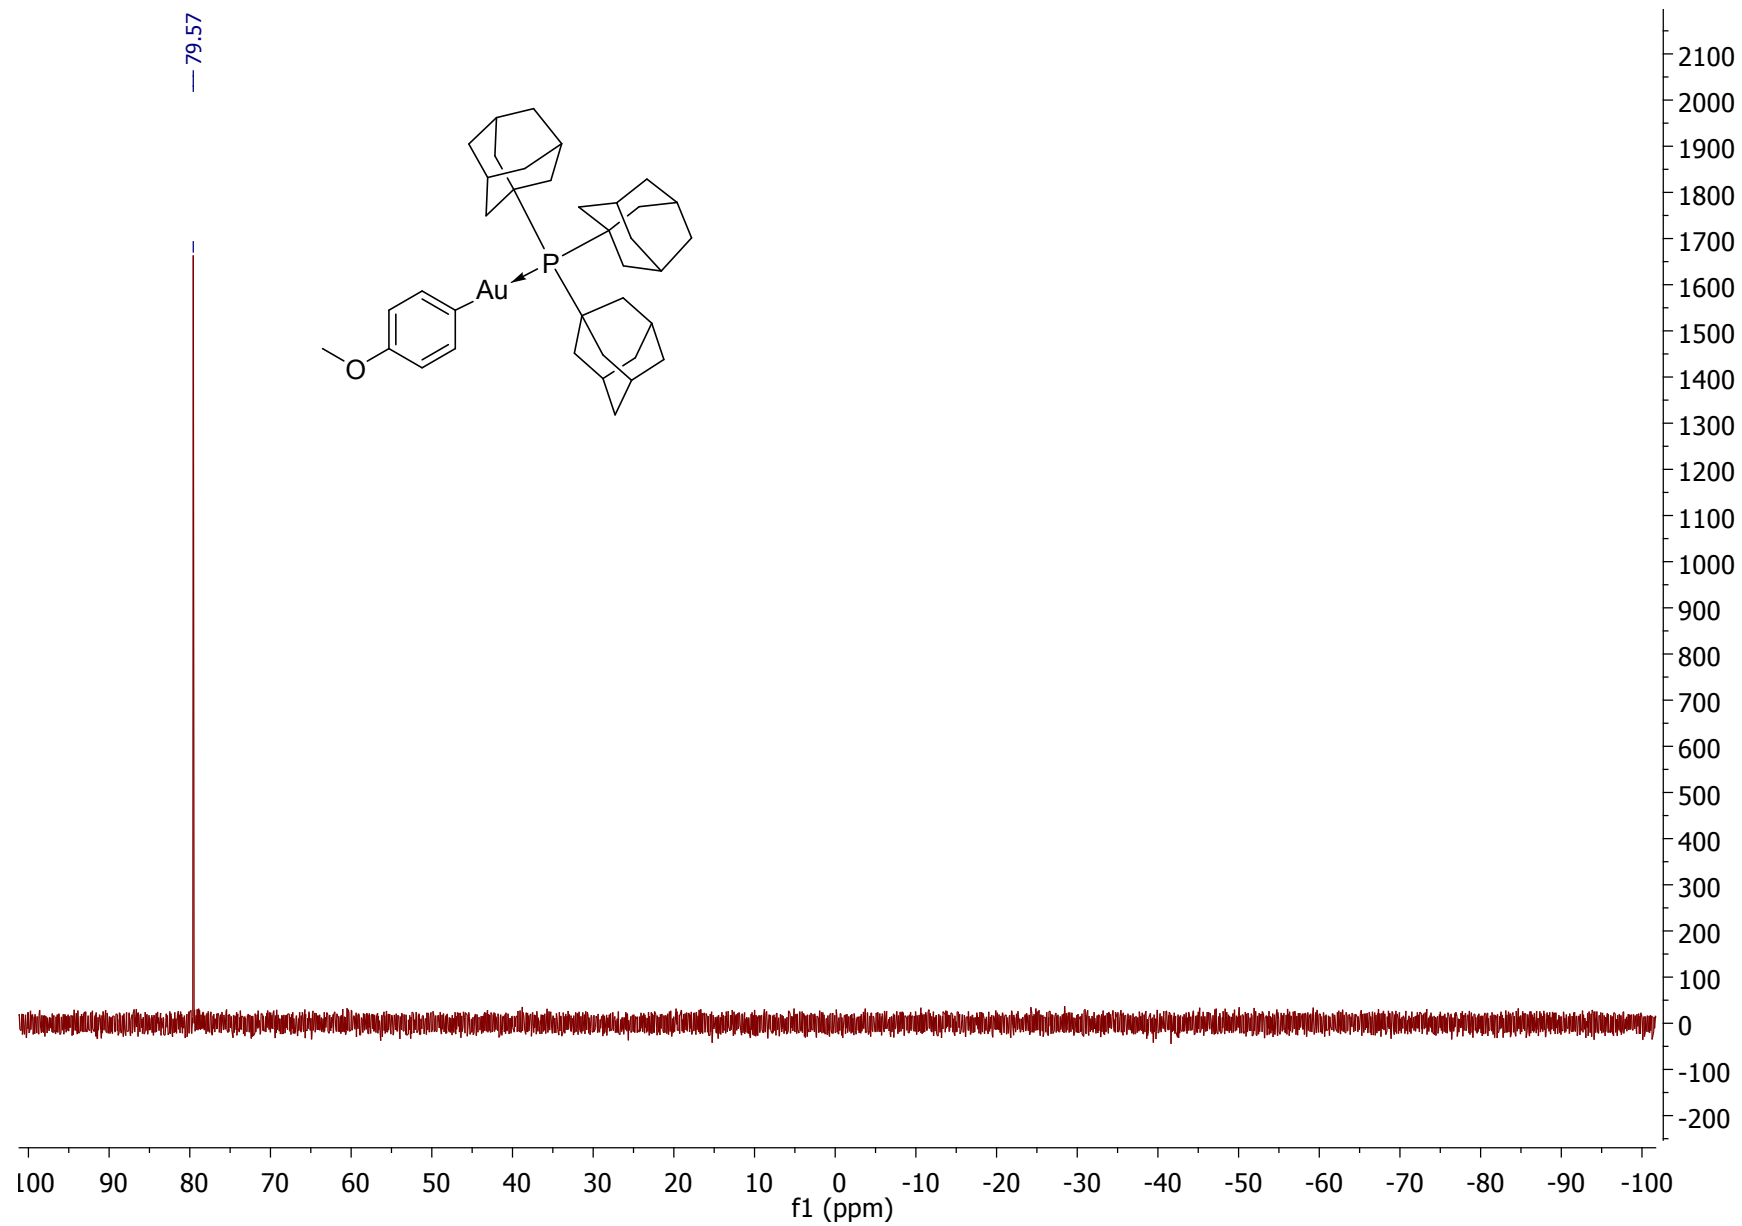

[Au(PAd<sub>3</sub>)(C≡CPh)] (**11**) <sup>1</sup>H NMR spectrum

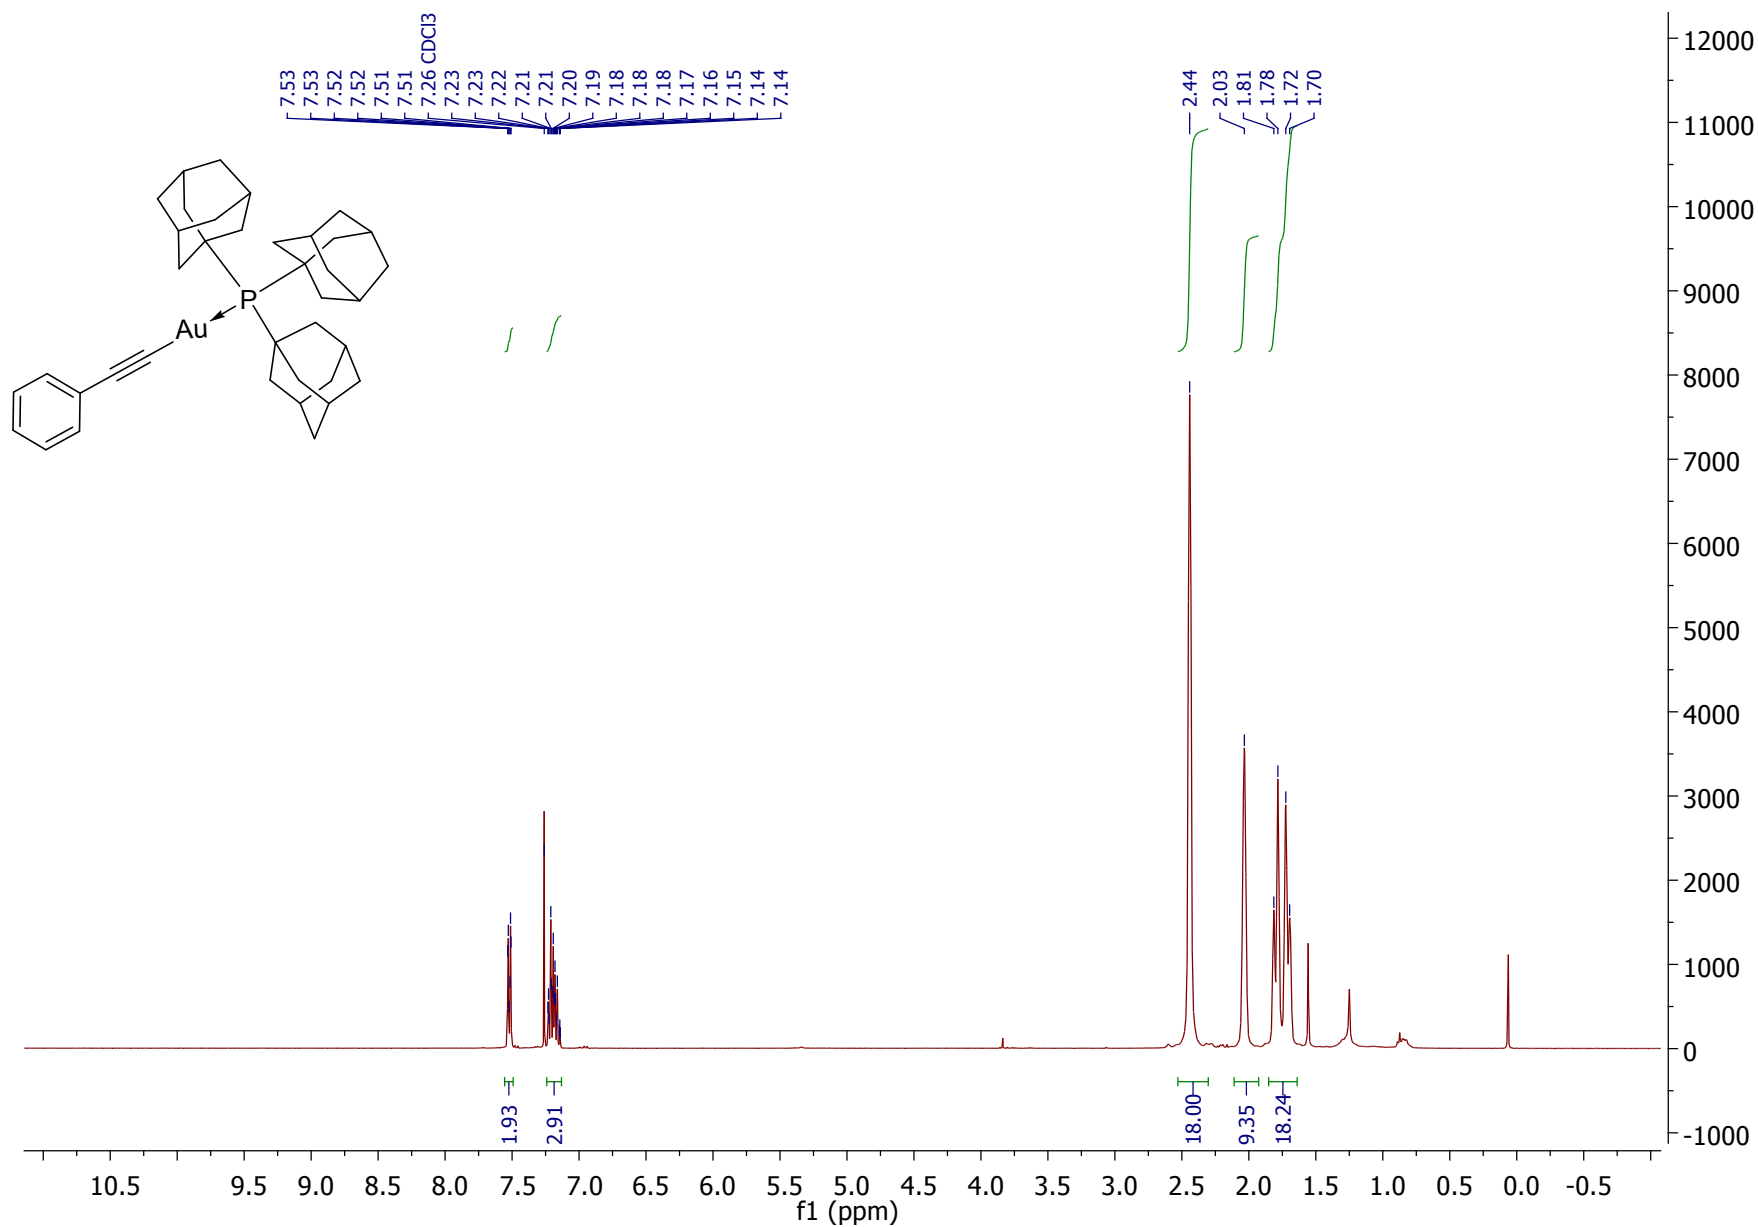



[Au(PAd<sub>3</sub>)(C≡CPh)] (**11**) <sup>13</sup>C NMR spectrum

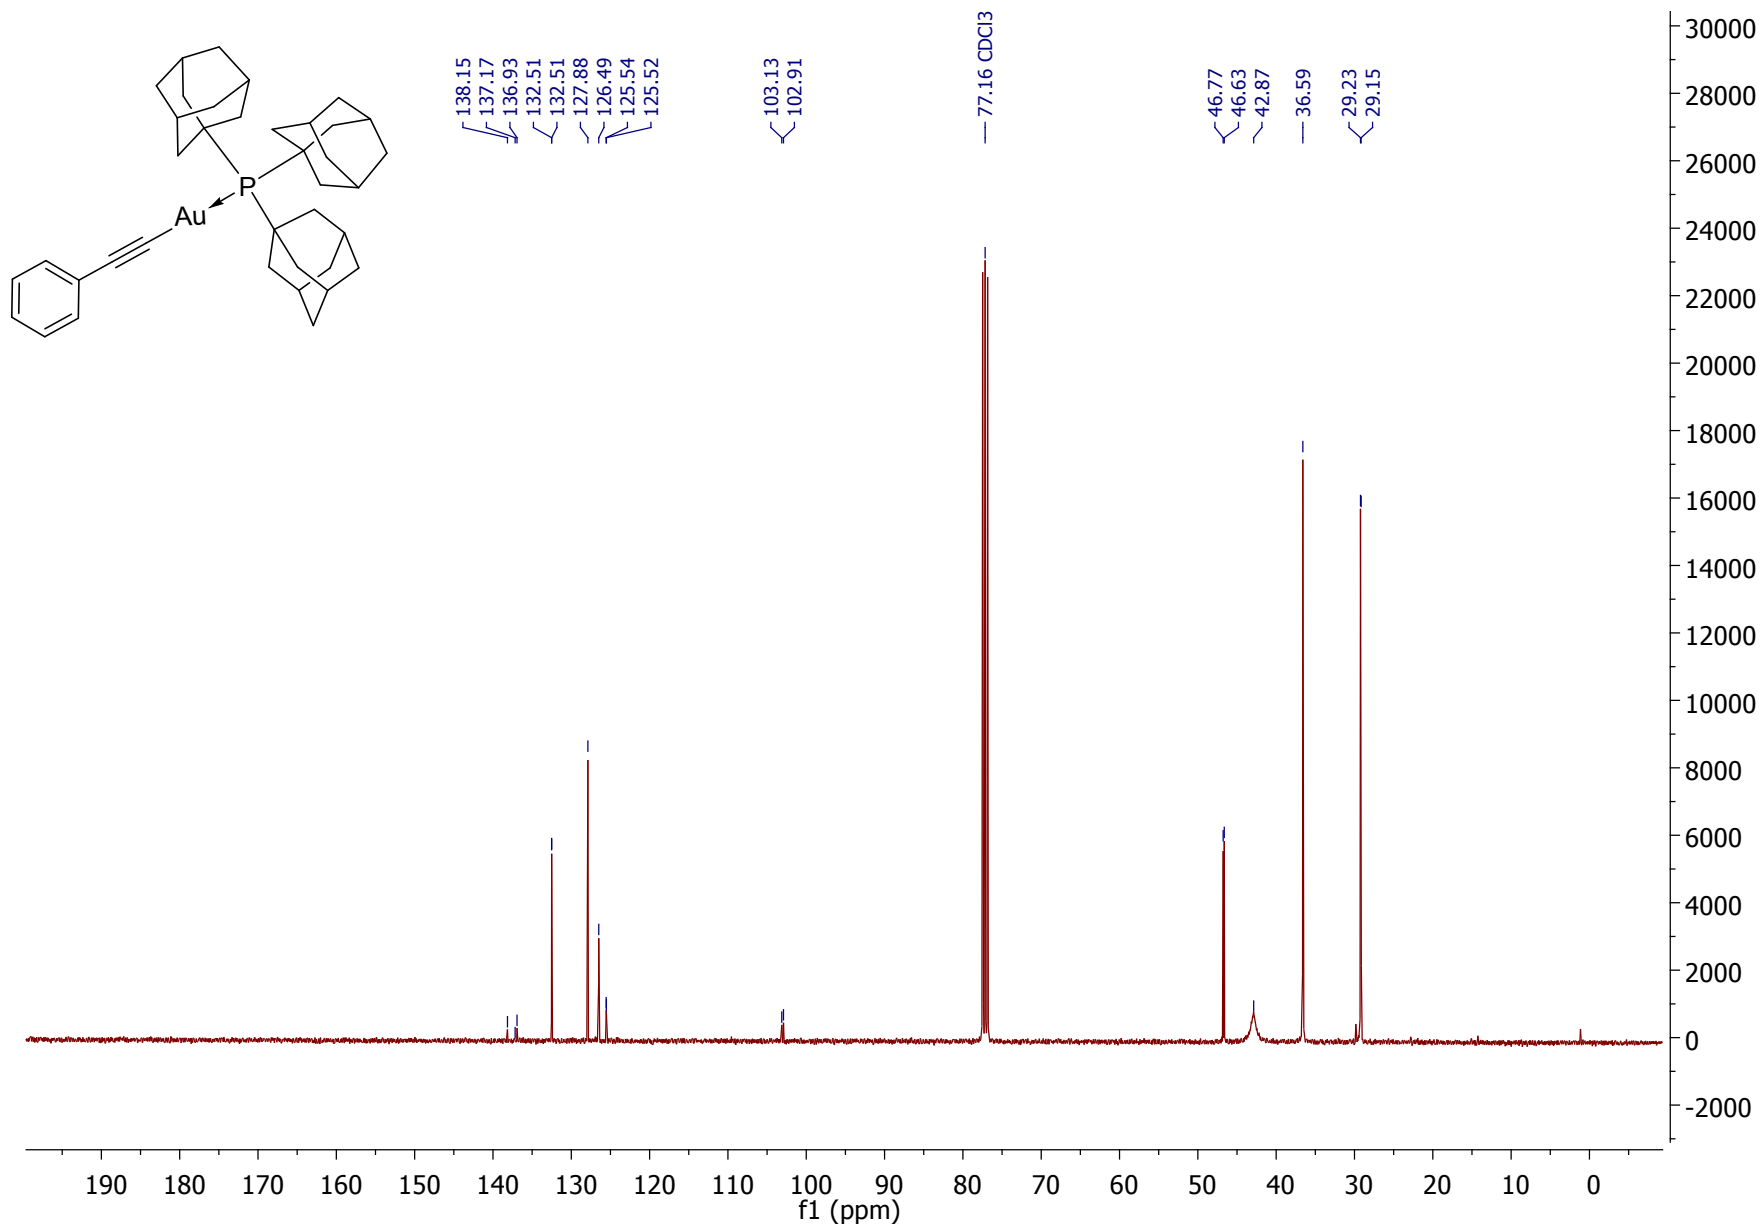

[Au(PAd<sub>3</sub>)(C≡CPh)] (**11**) <sup>31</sup>P NMR spectrum

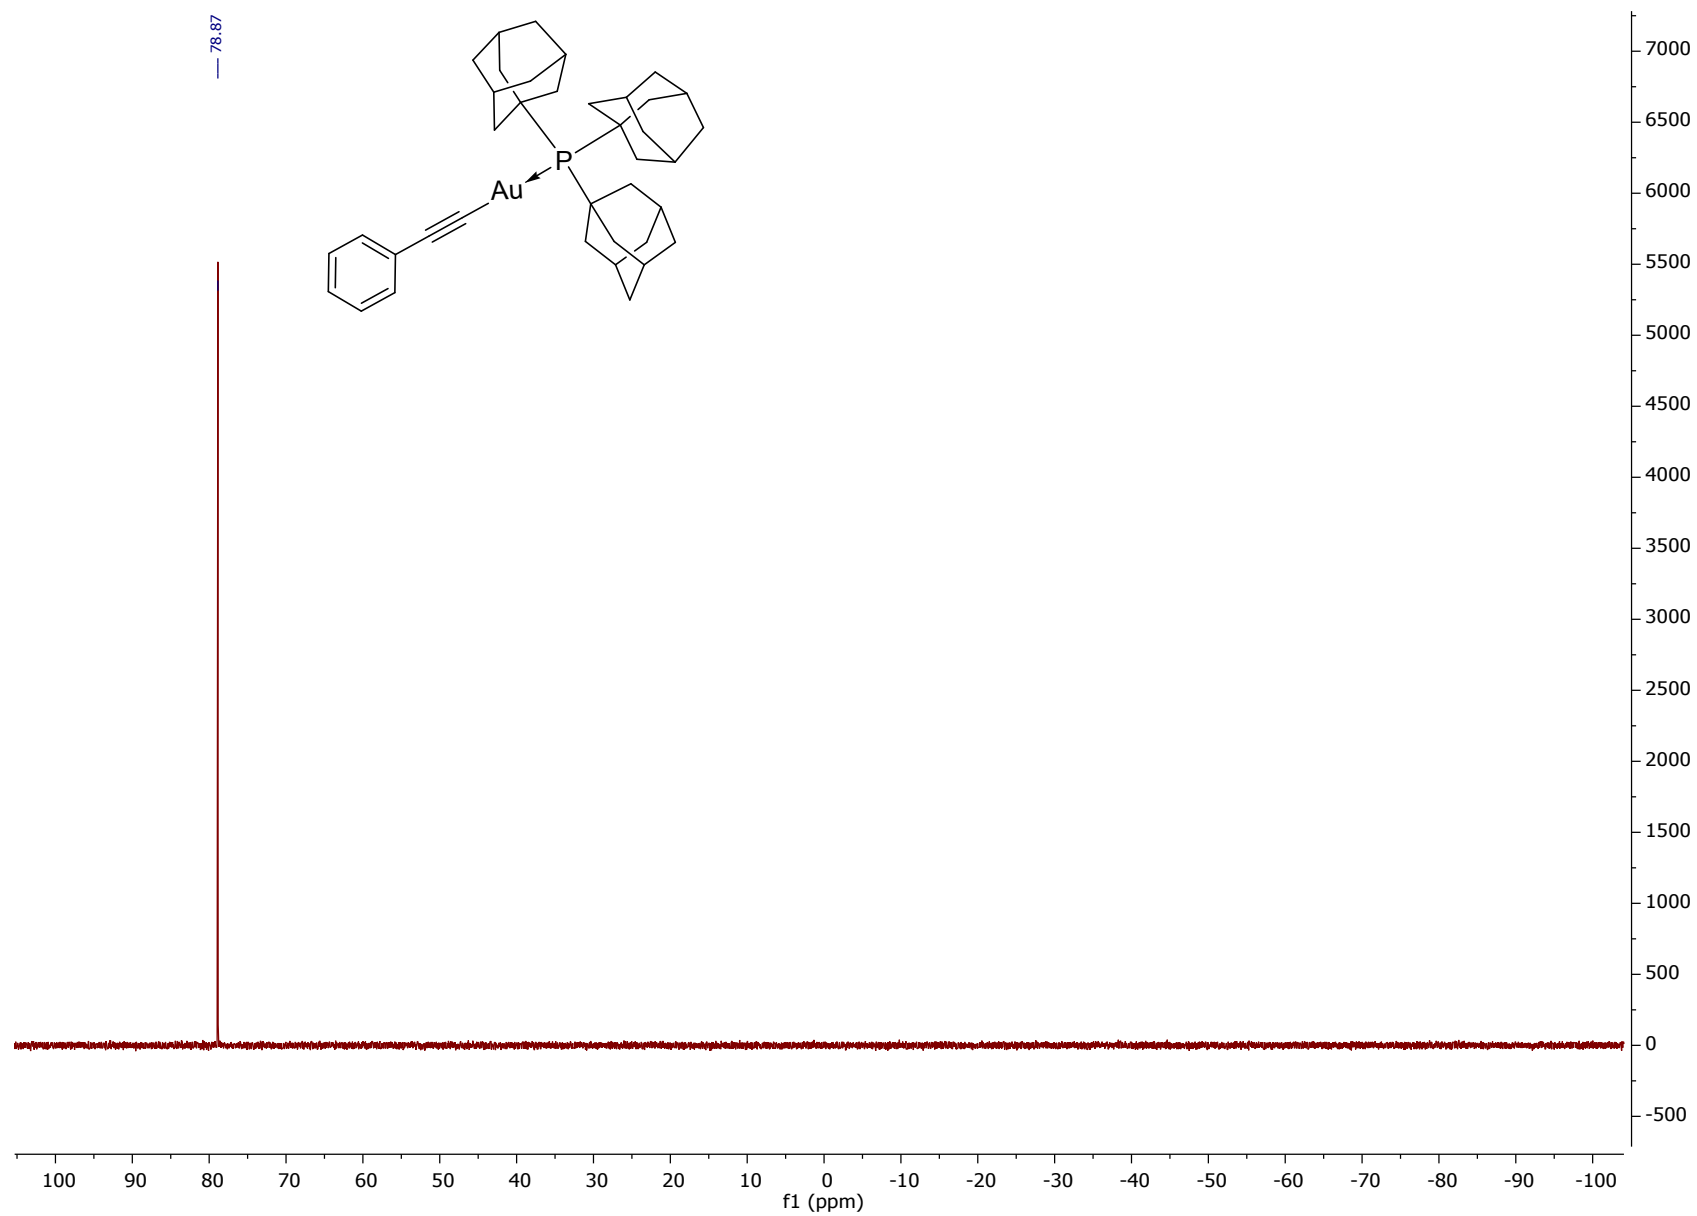

[Au(PAd<sub>3</sub>)(OPh)] (13) <sup>1</sup>H NMR spectrum

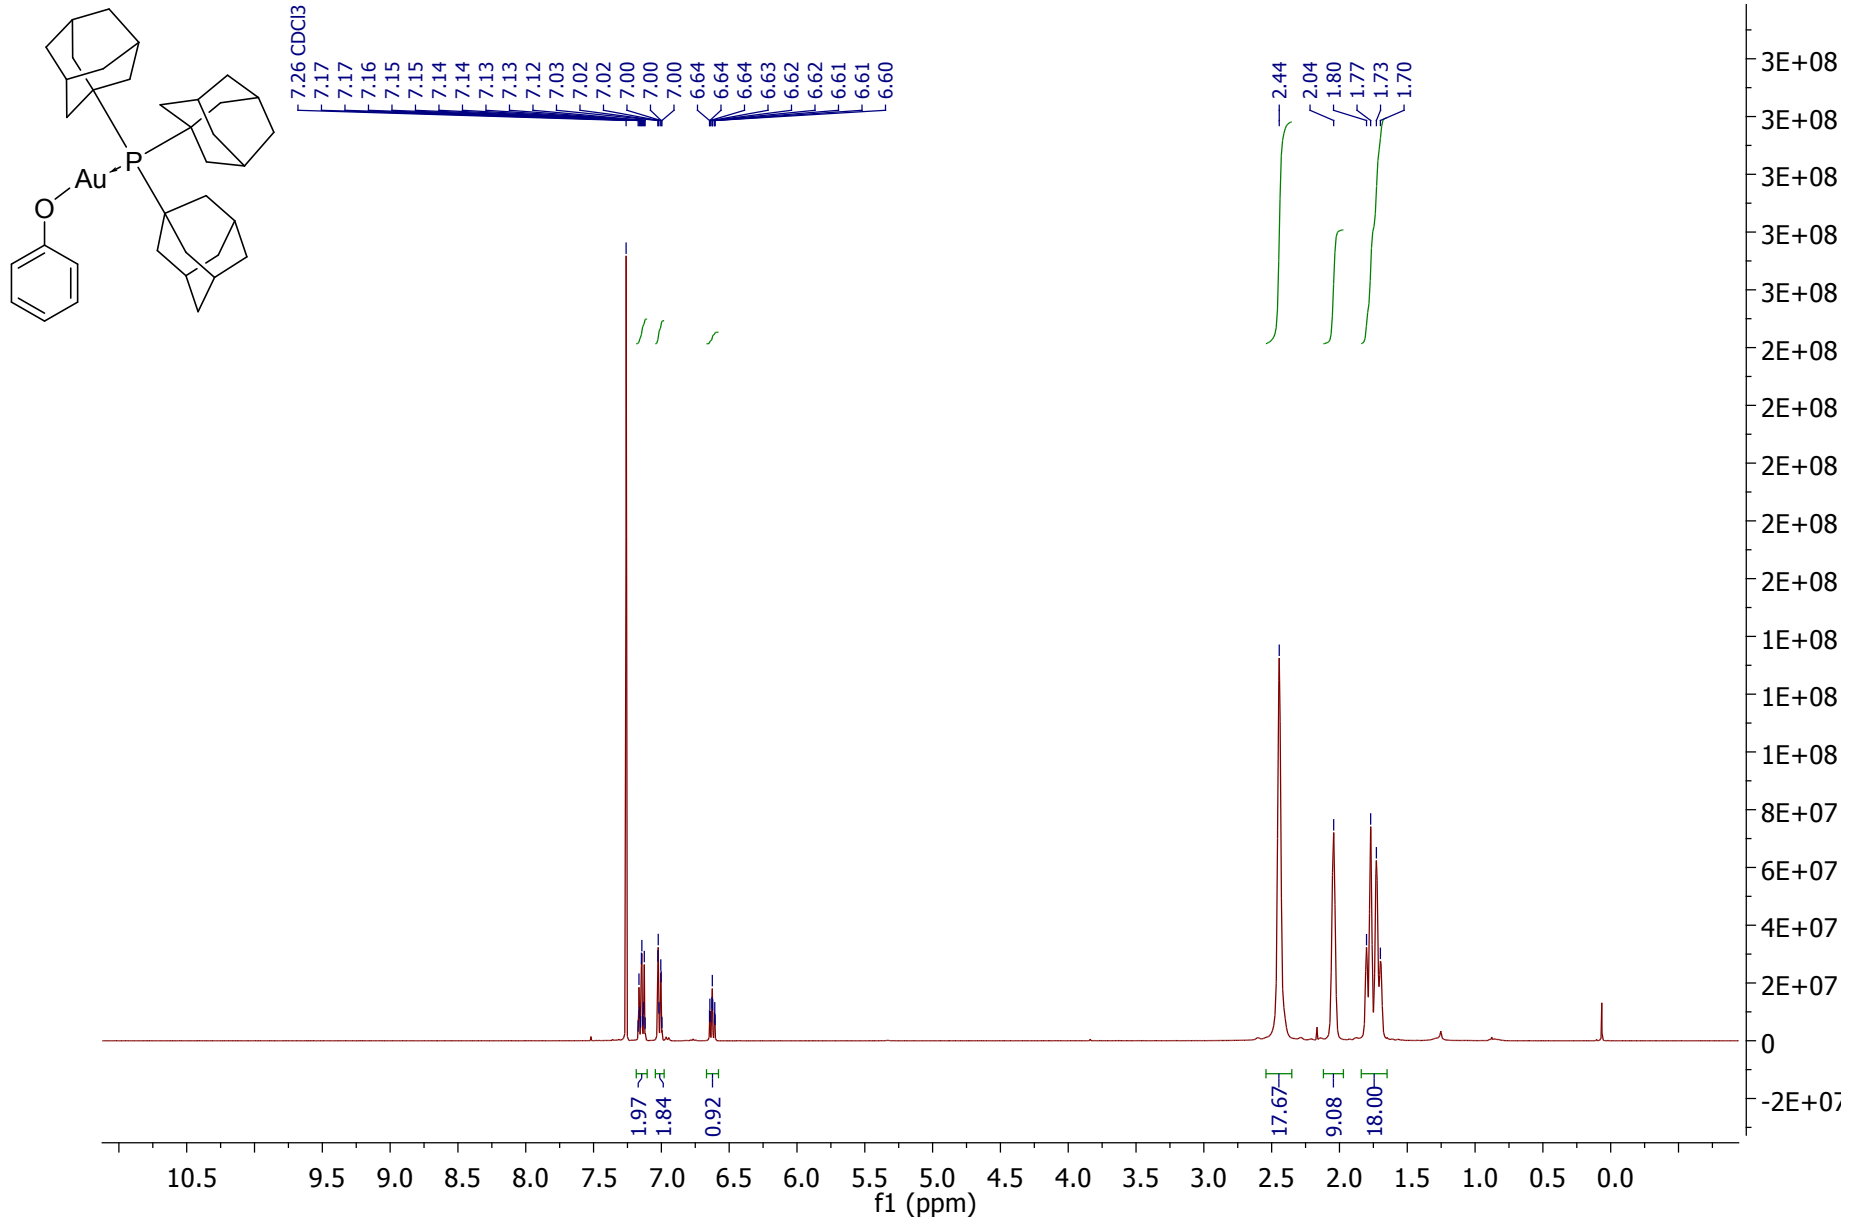

[Au(PAd<sub>3</sub>)(OPh)] (**13**) <sup>13</sup>C NMR spectrum

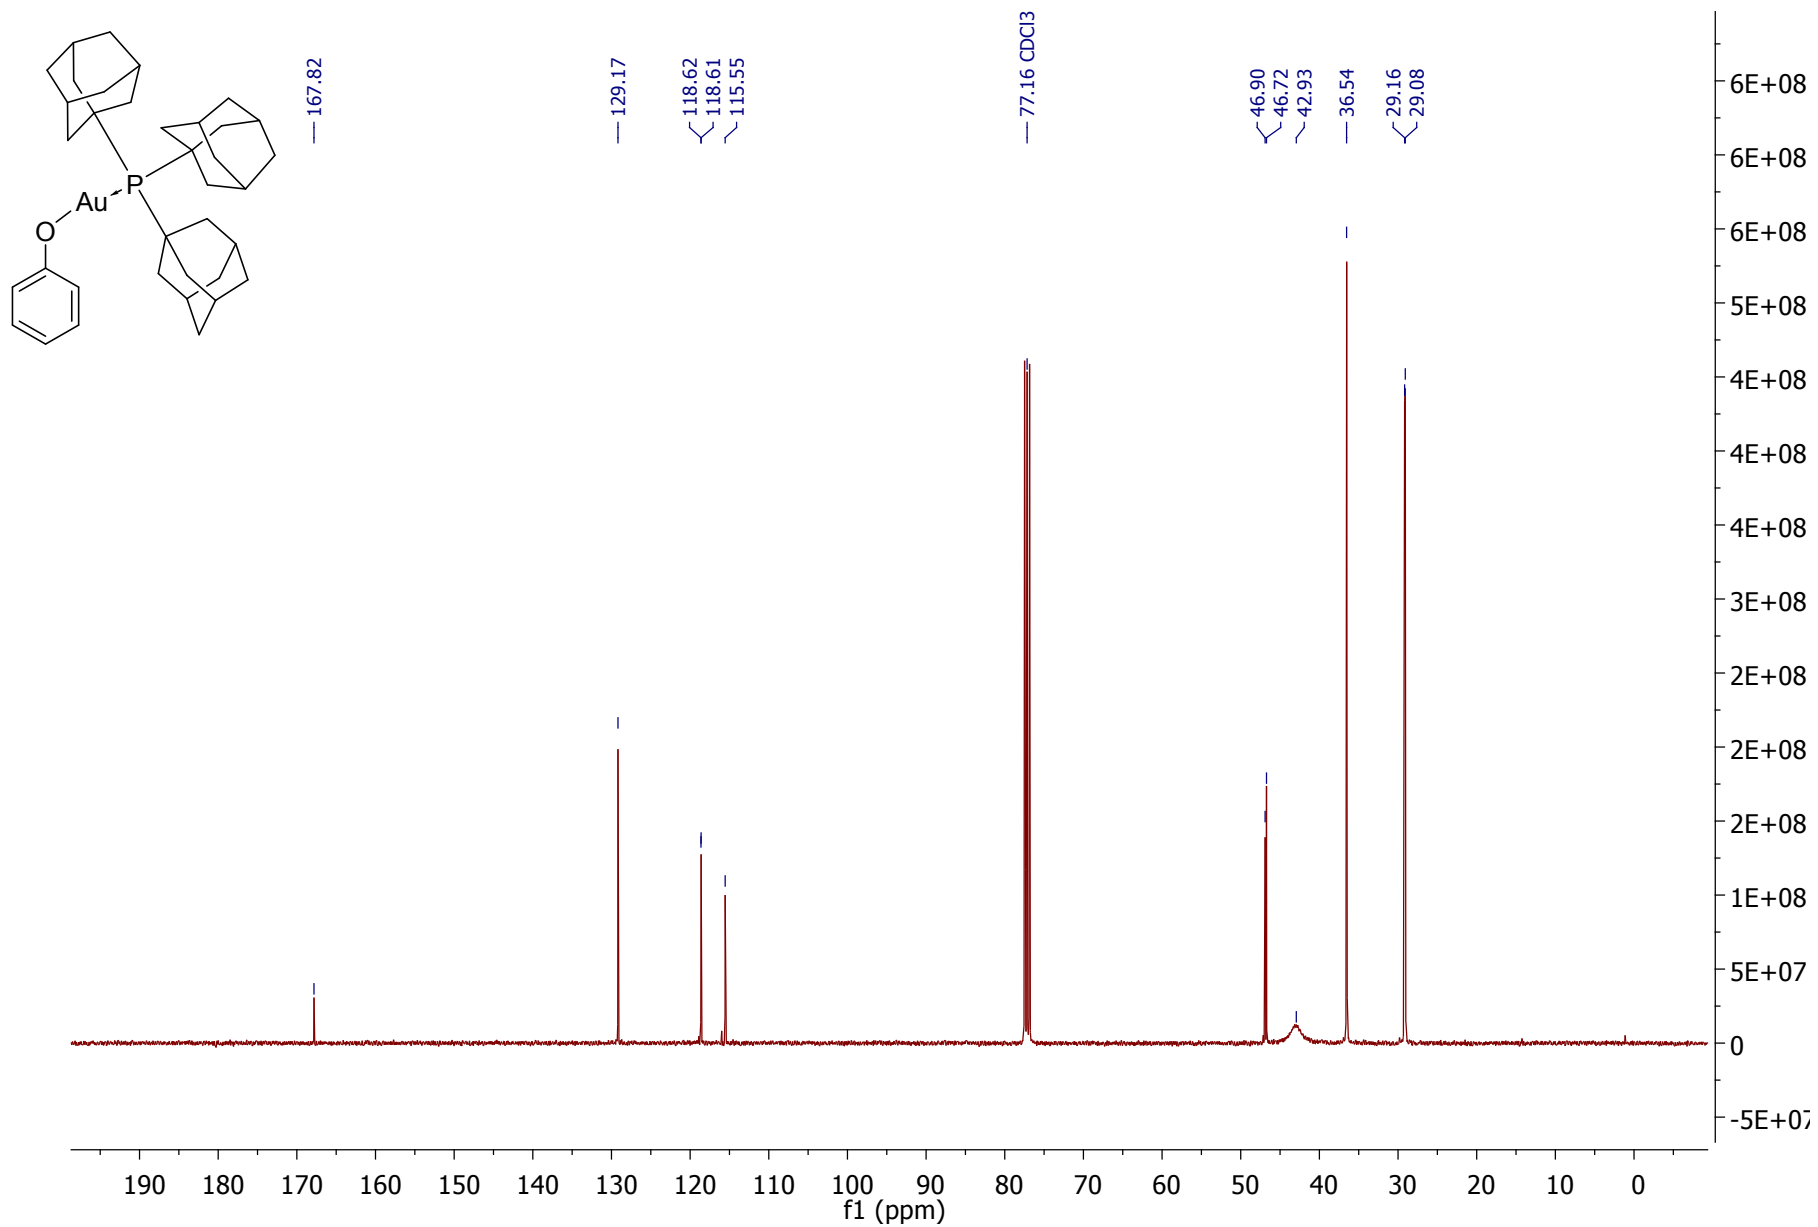

[Au(PAd<sub>3</sub>)(OPh)] (**13**) <sup>31</sup>P NMR spectrum

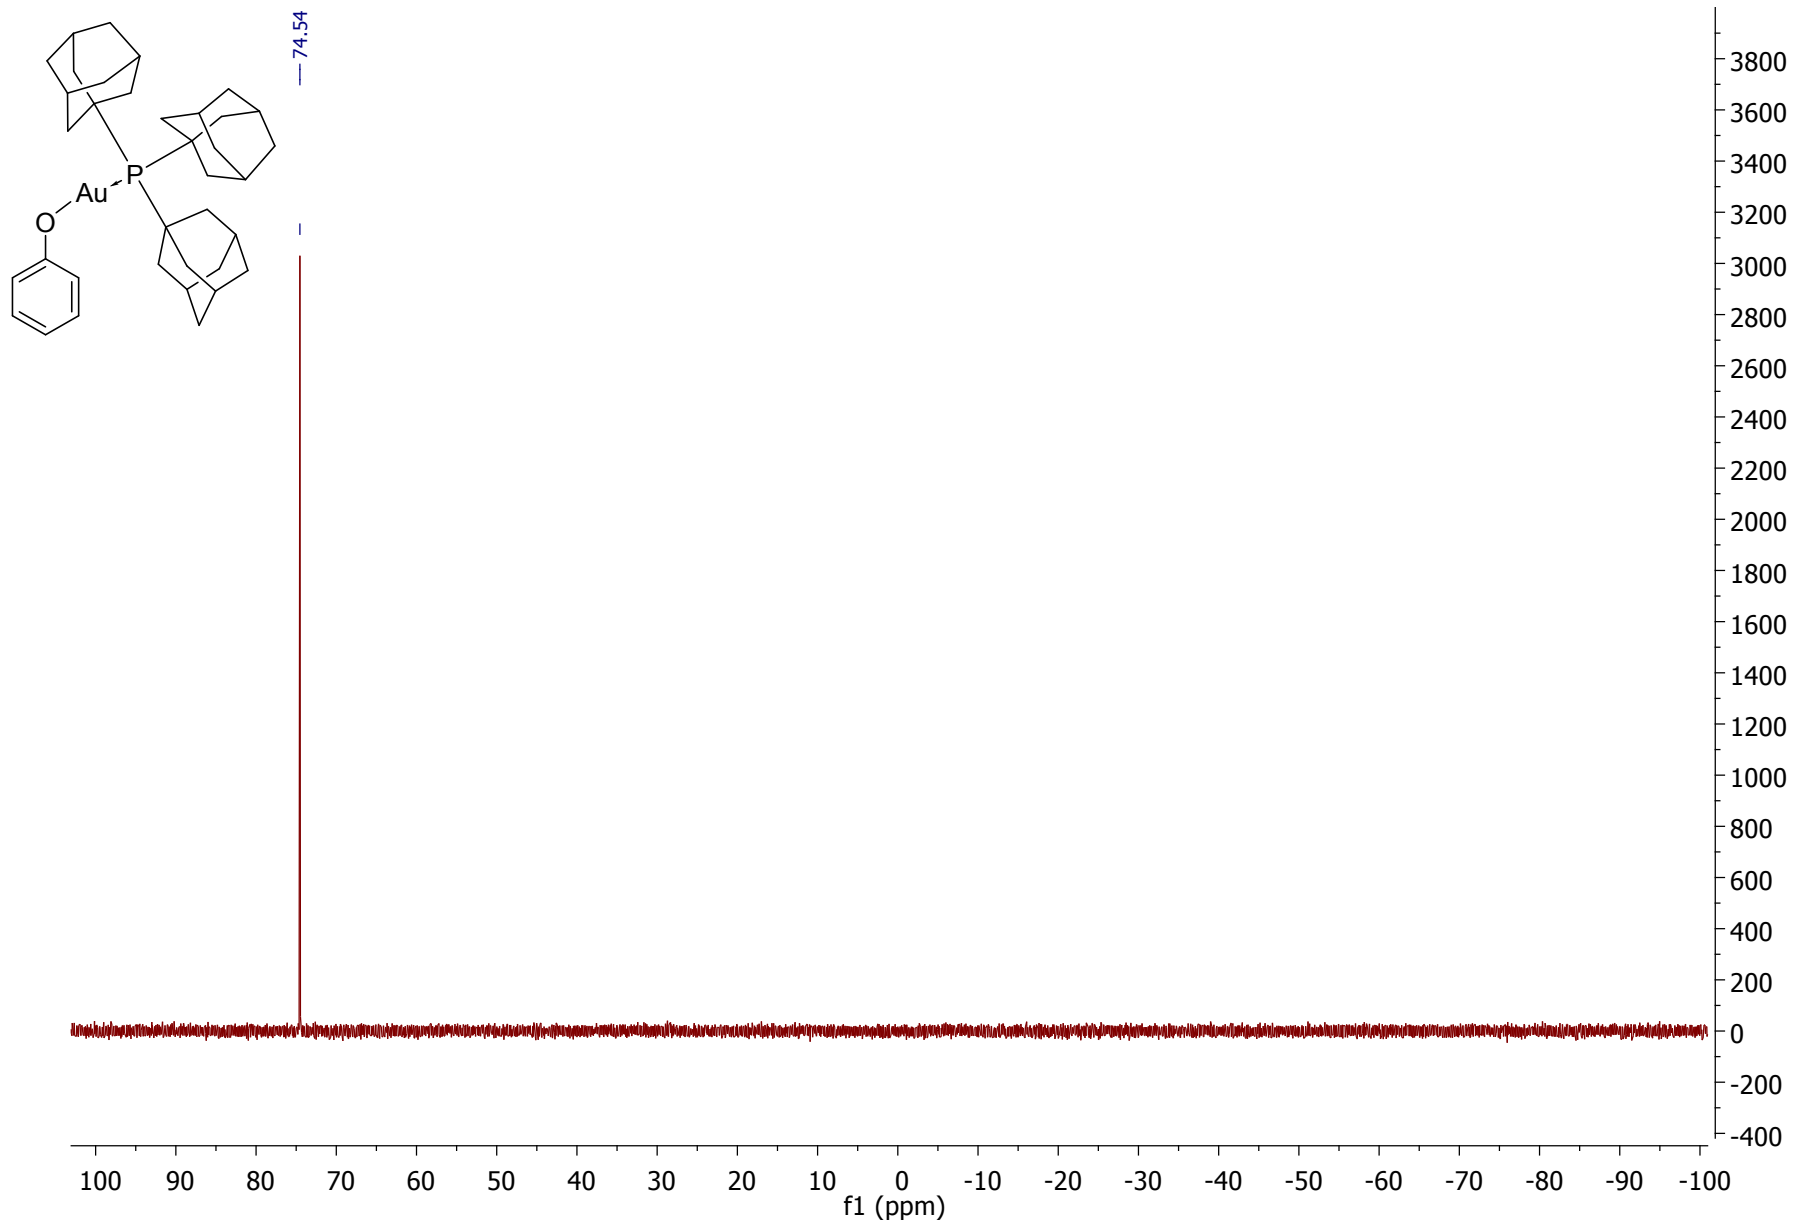

[Au(PAd<sub>3</sub>(CSA))] (**12**) <sup>1</sup>H NMR spectrum

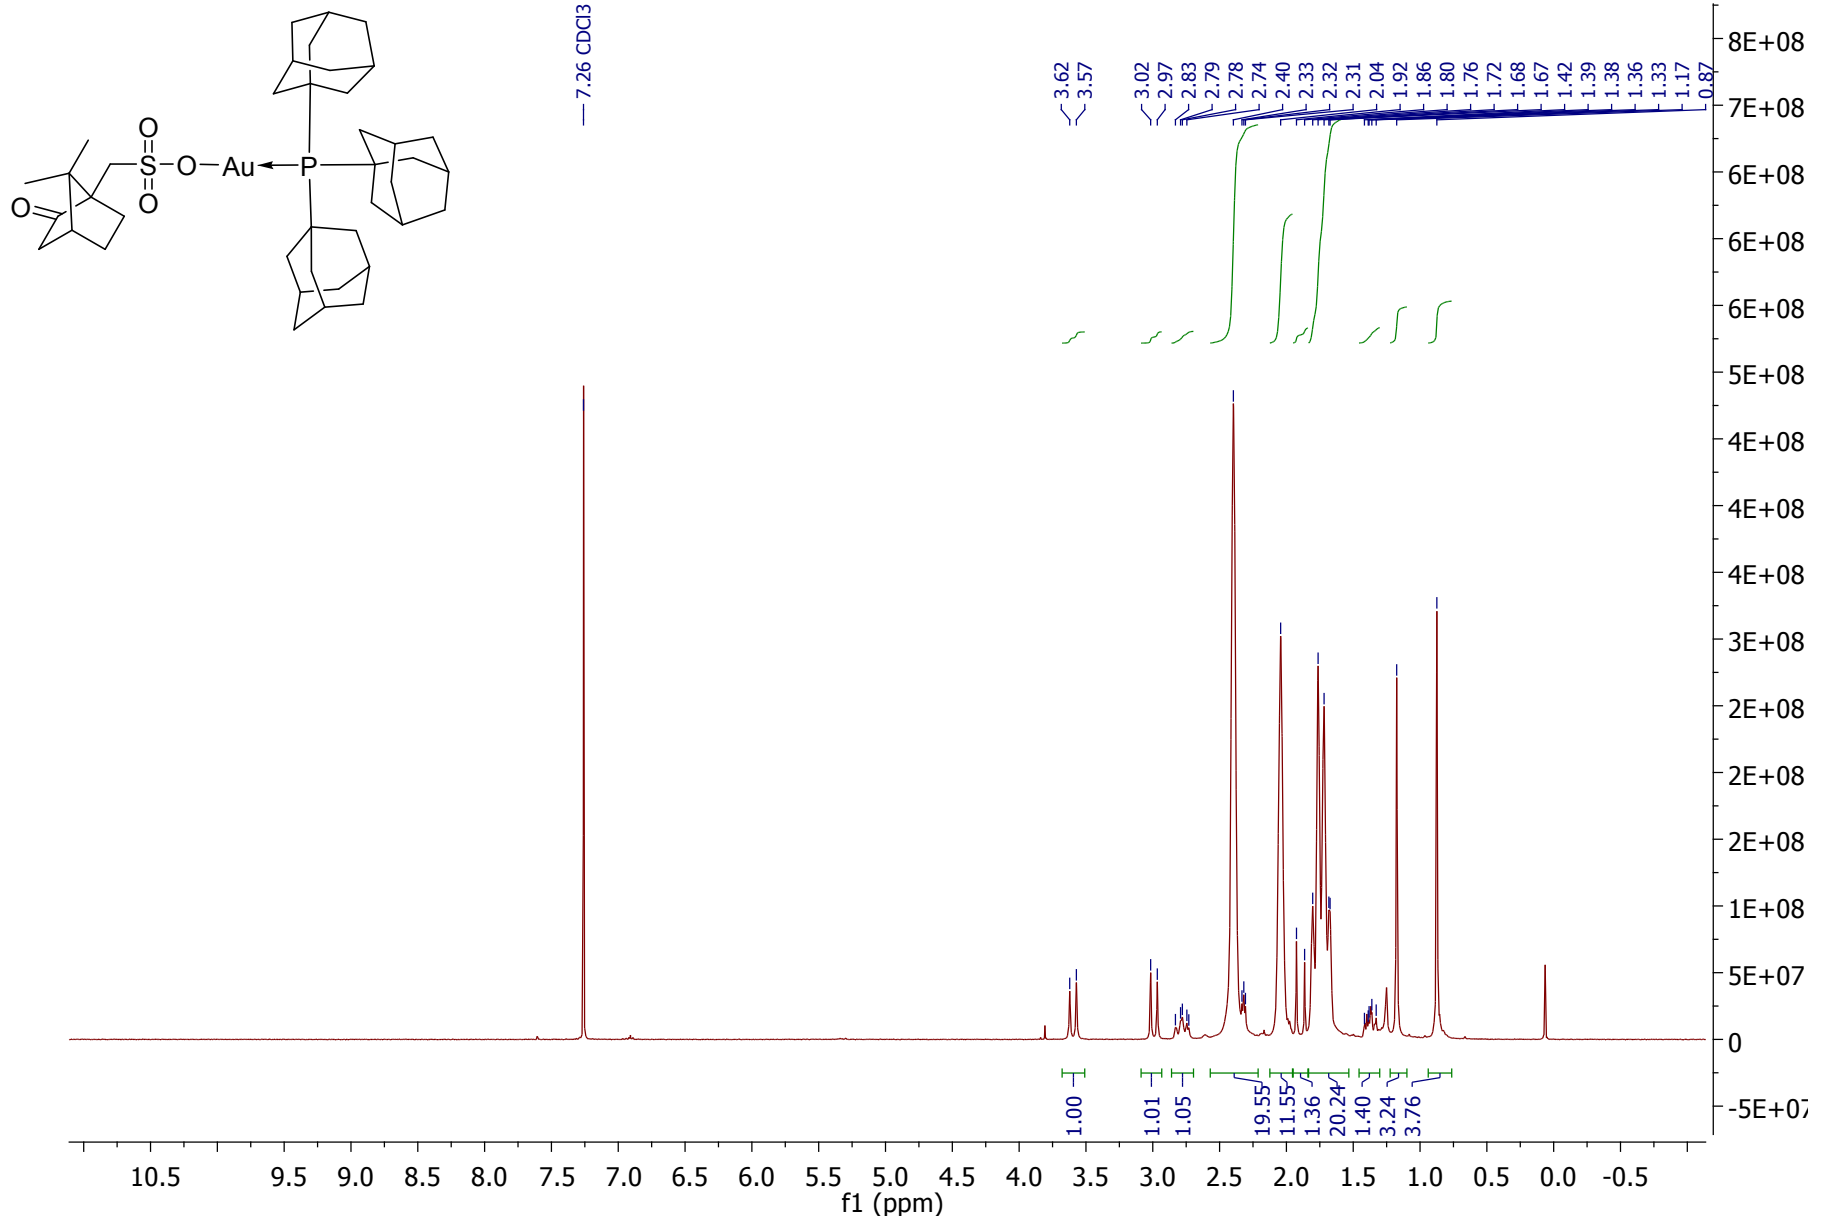

[Au(PAd<sub>3</sub>(CSA))] (**12**) <sup>13</sup>C NMR spectrum

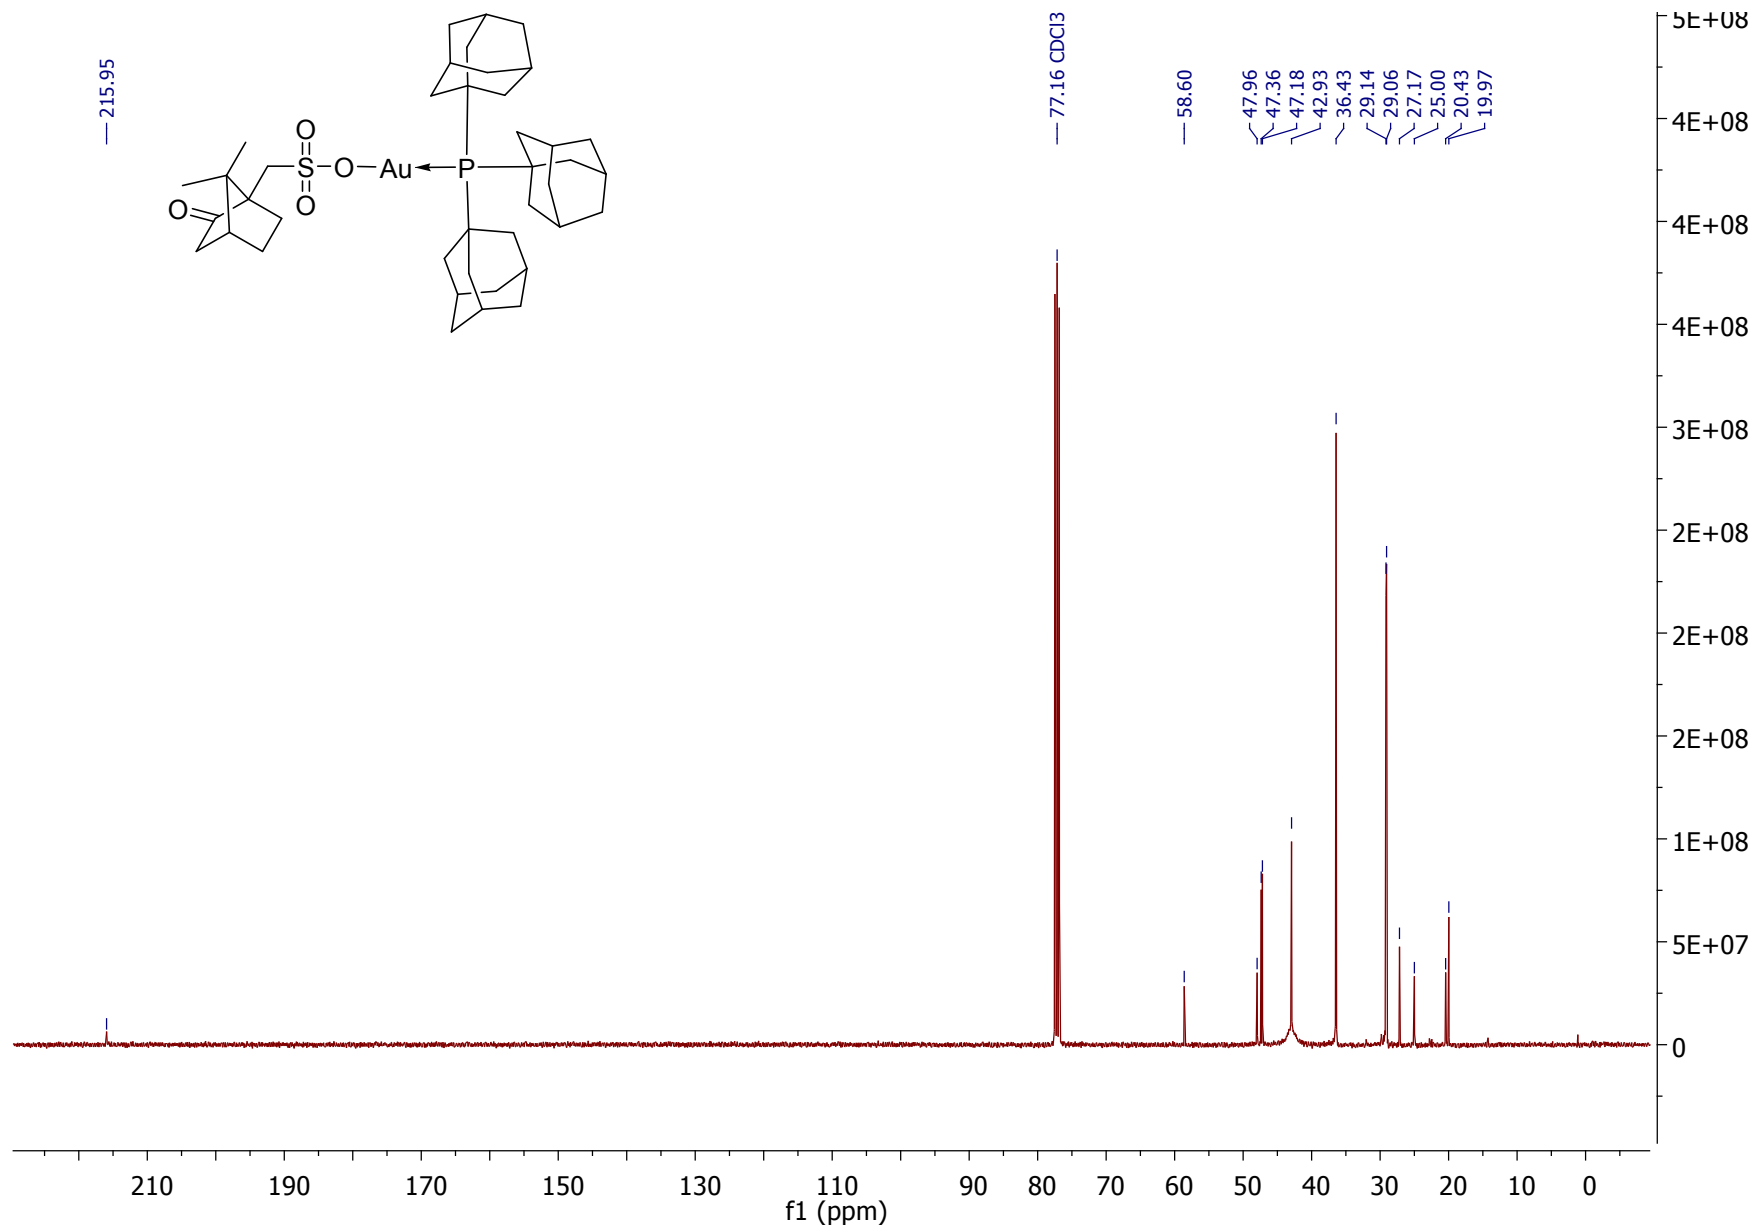

[Au(PAd<sub>3</sub>(CSA))] (**12**) <sup>31</sup>P NMR spectrum

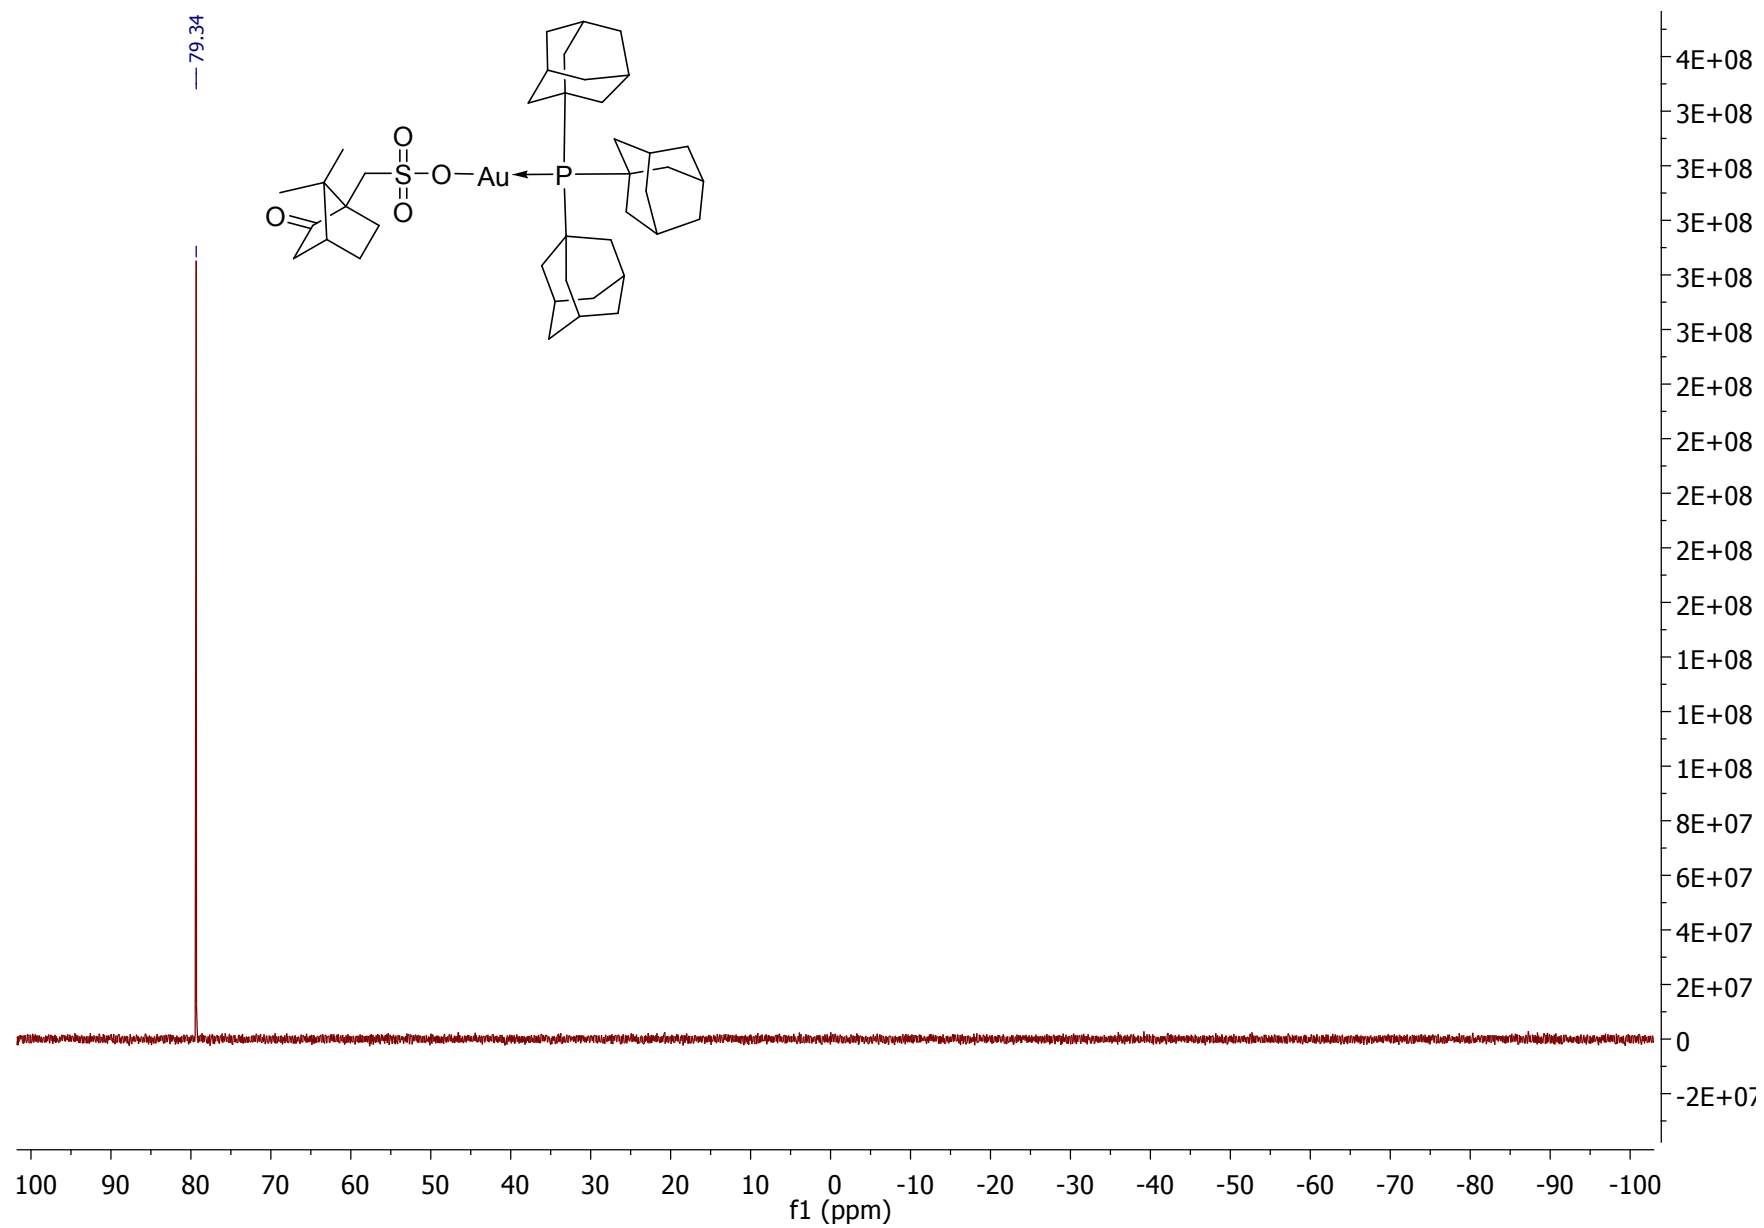



[Au(JohnPhos)Cl] <sup>1</sup>H NMR spectrum

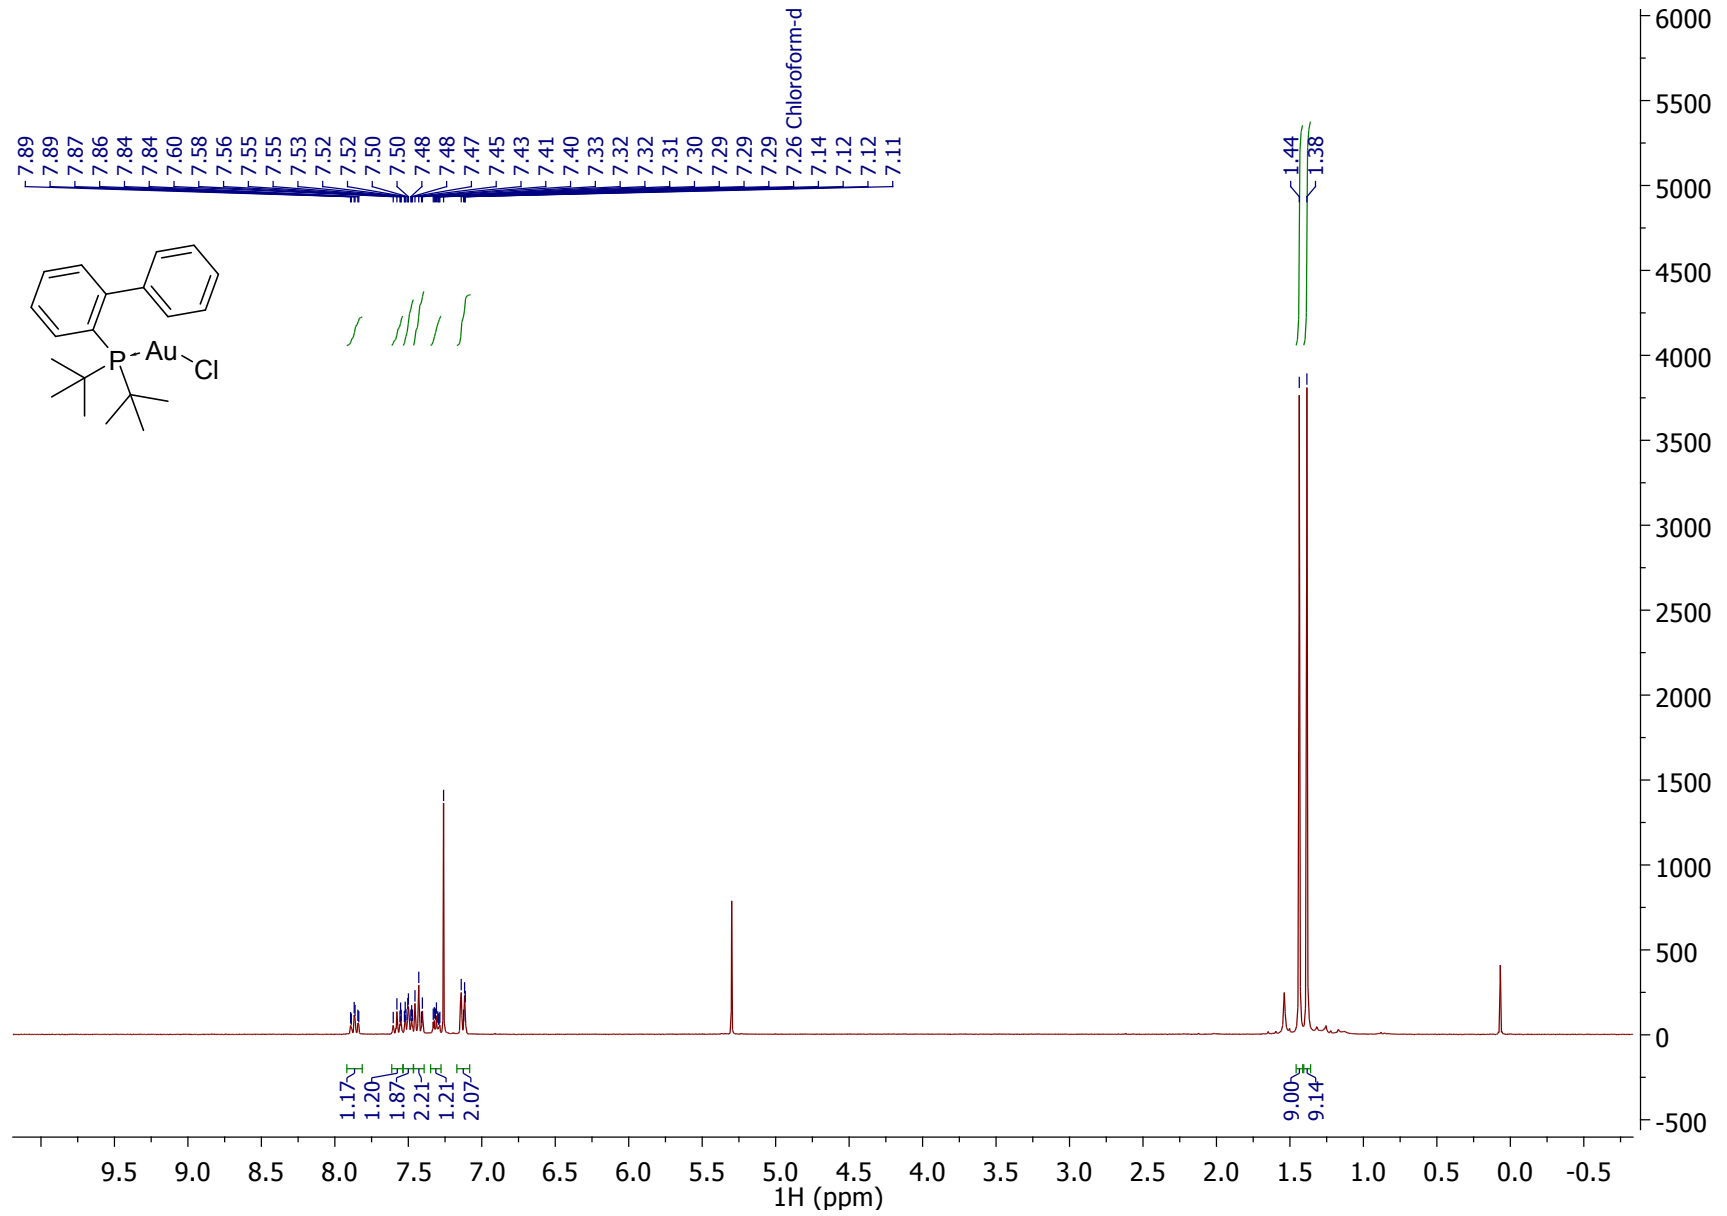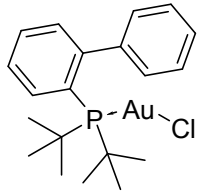

[Au(JohnPhos)Cl] <sup>31</sup>P NMR spectrum

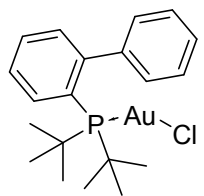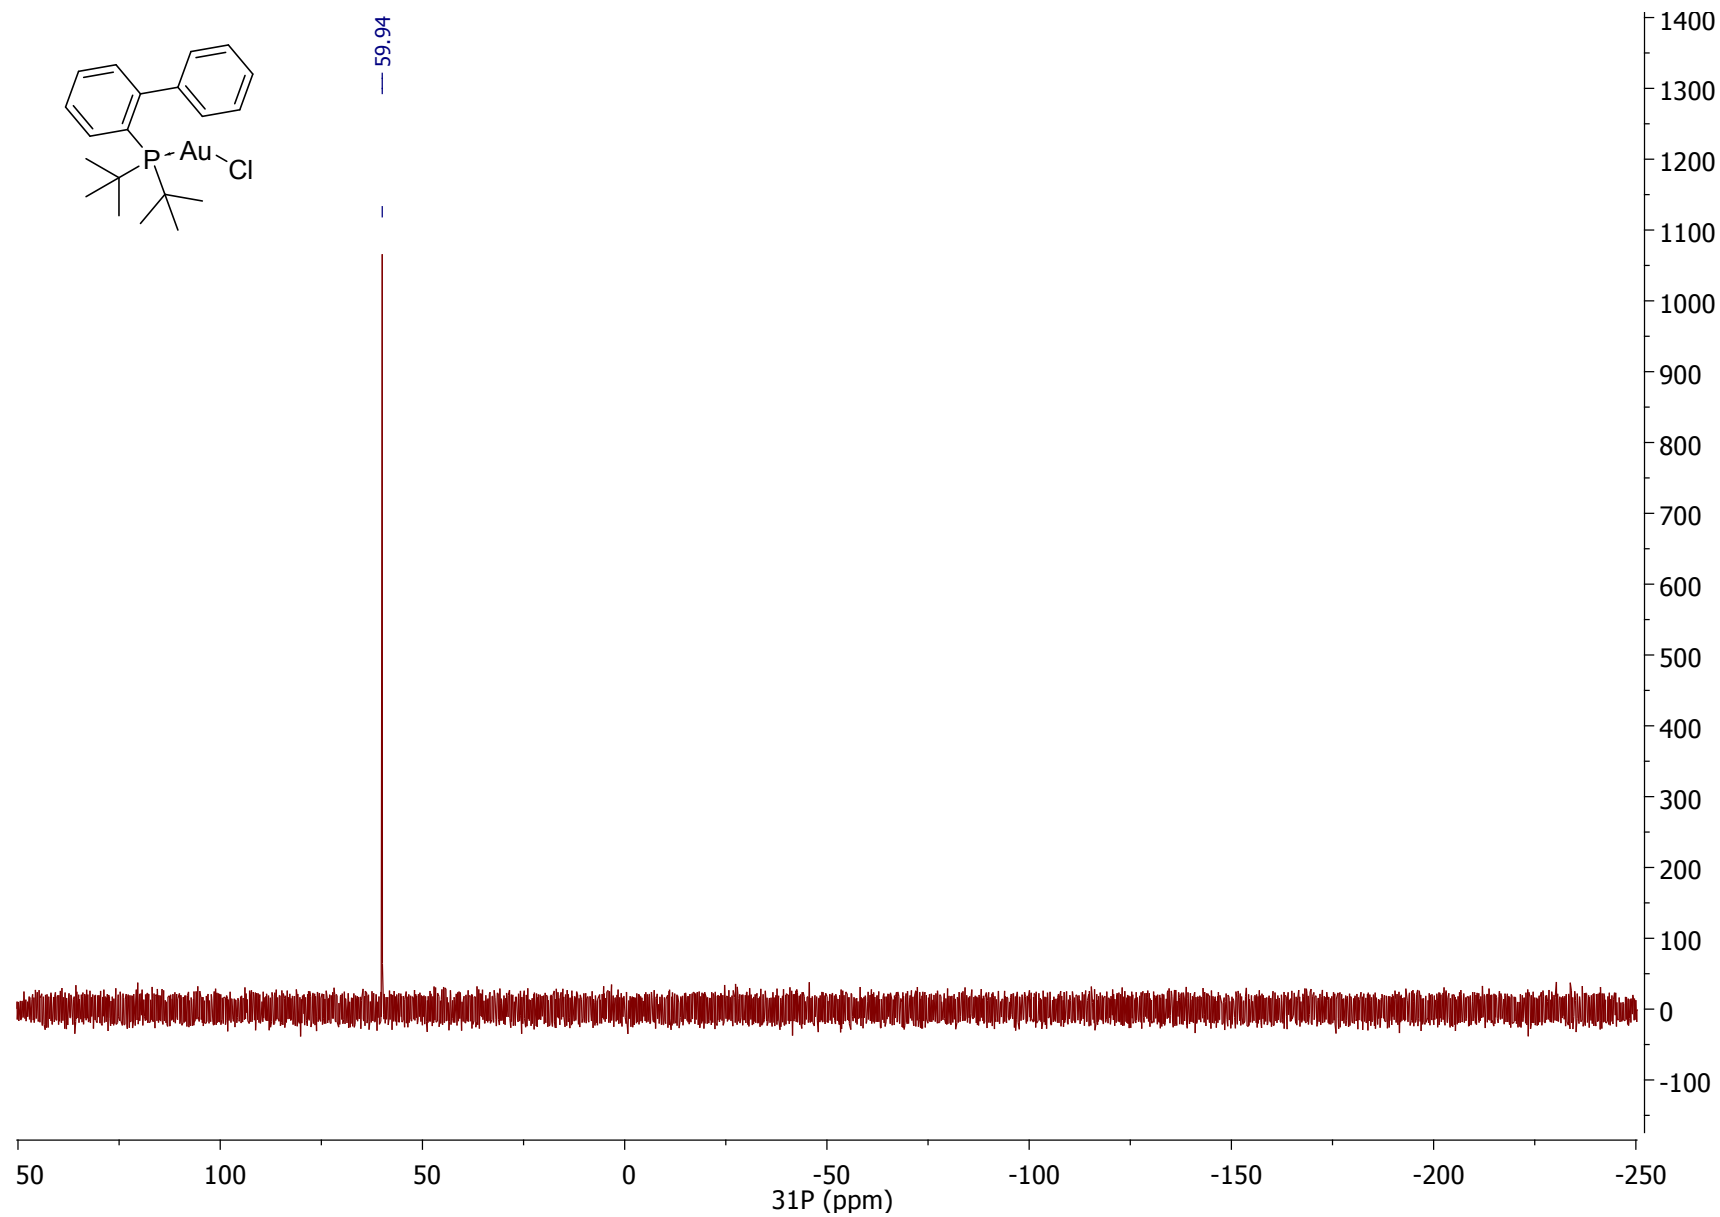

[Au(JohnPhos)OTf] <sup>1</sup>H NMR spectrum

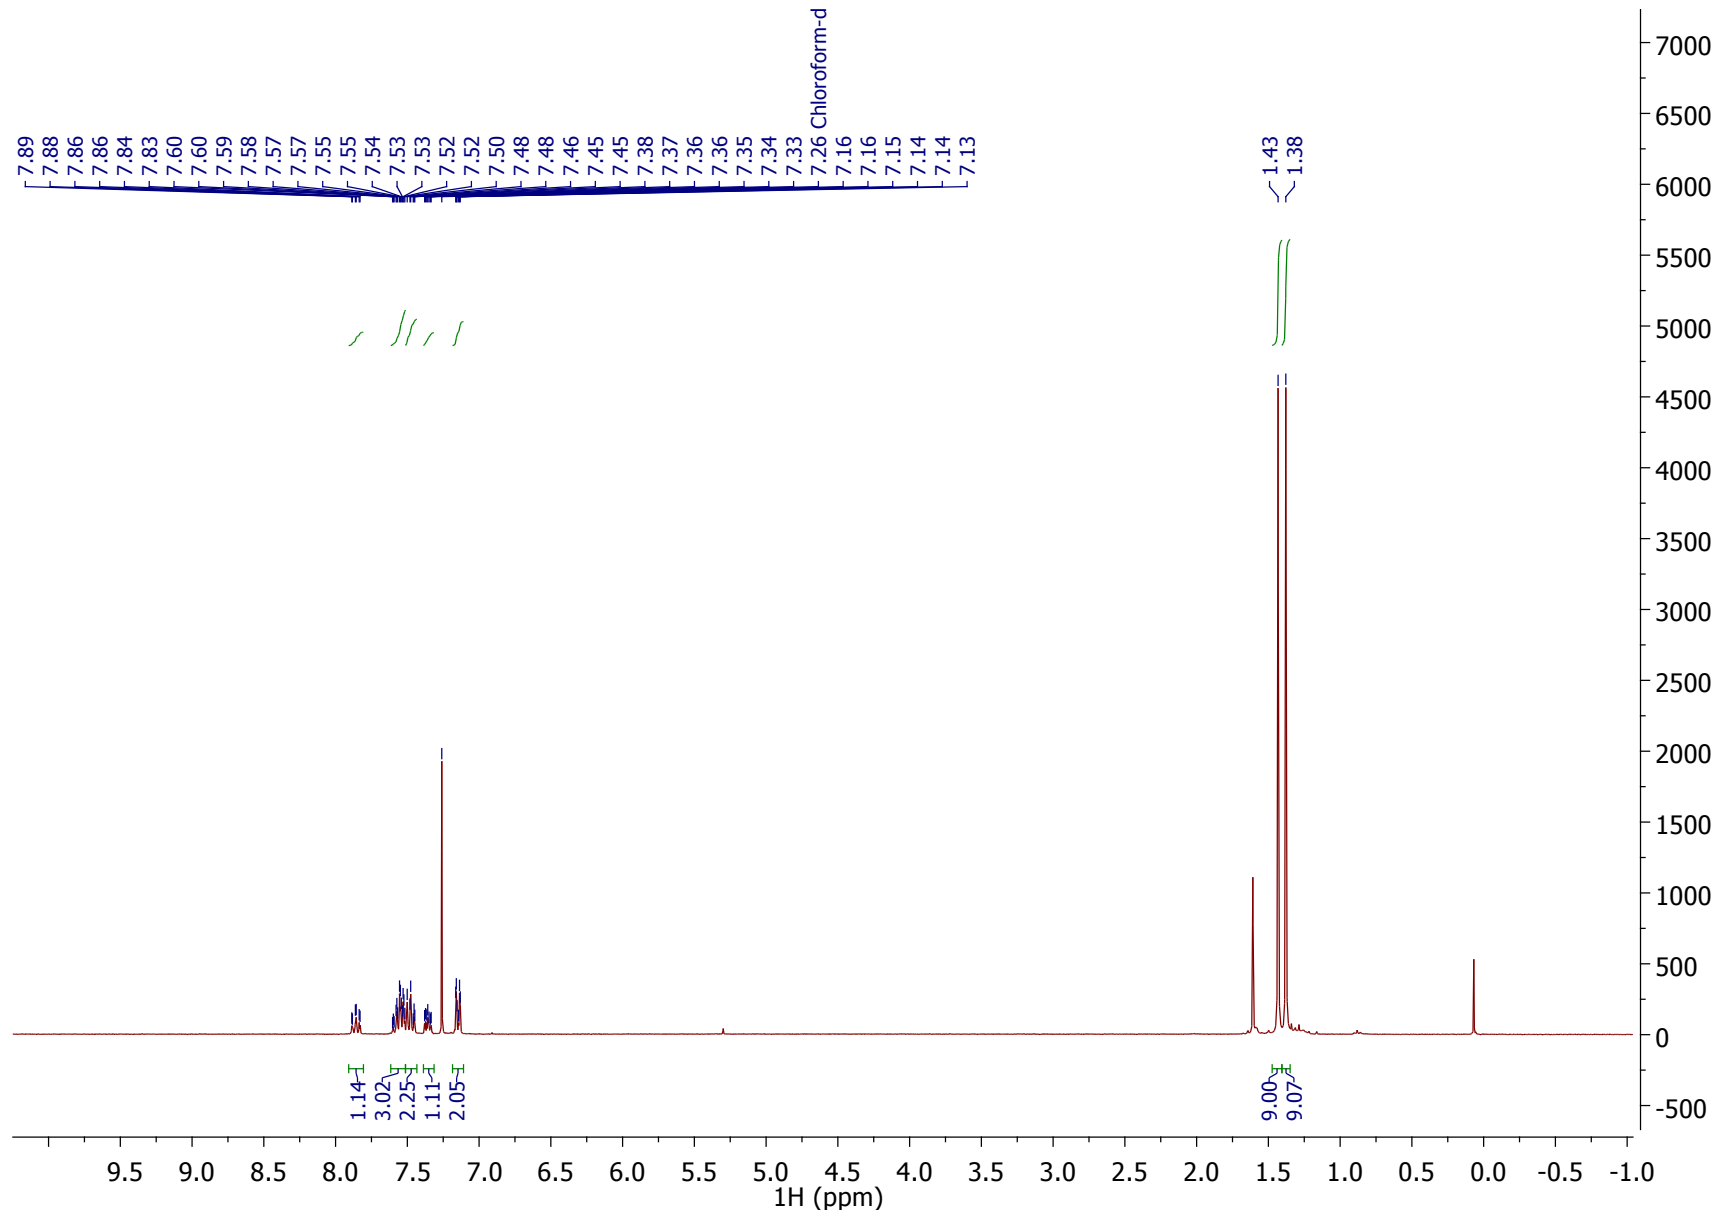

[Au(JohnPhos)OTf] <sup>31</sup>P NMR spectrum

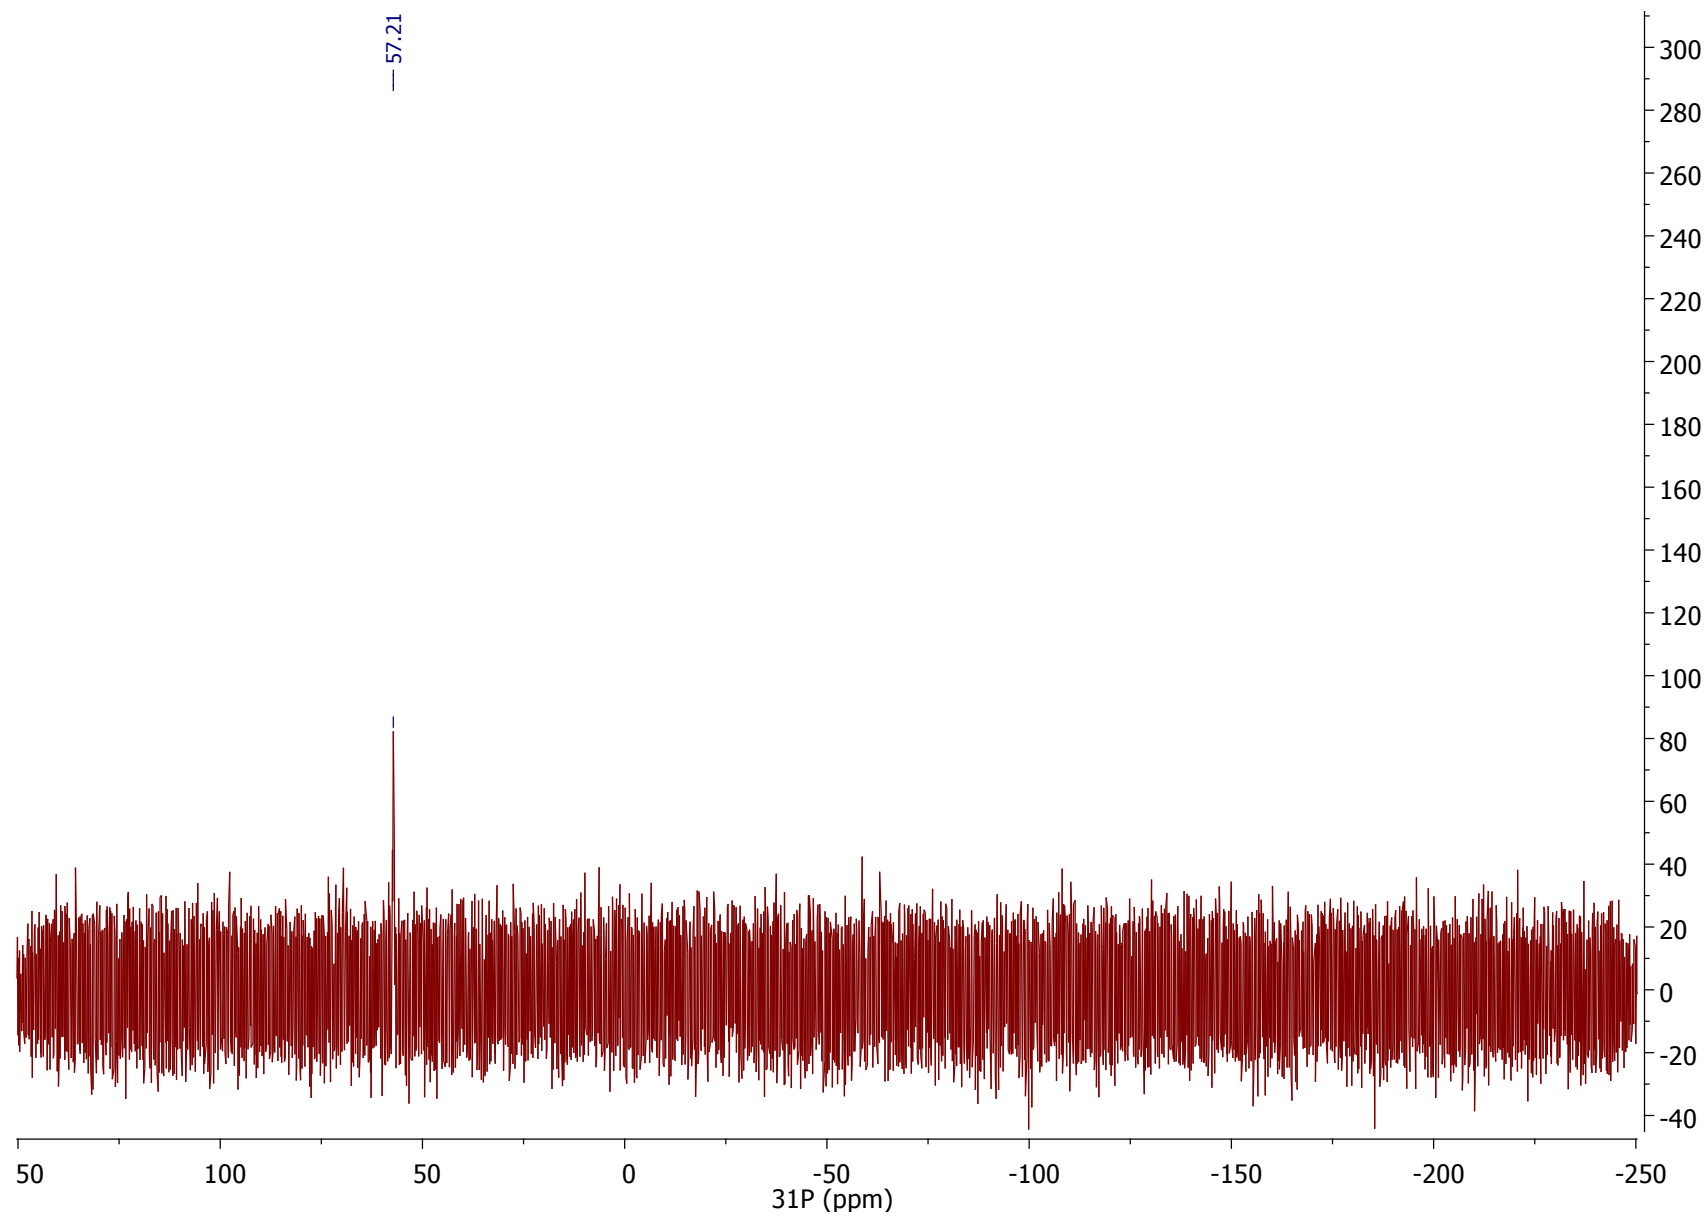

$^1\text{H}$  NMR spectrum of sample taken from reaction mixture of diphenylacetylene hydration after 8h with 0.2 mol% of **6**

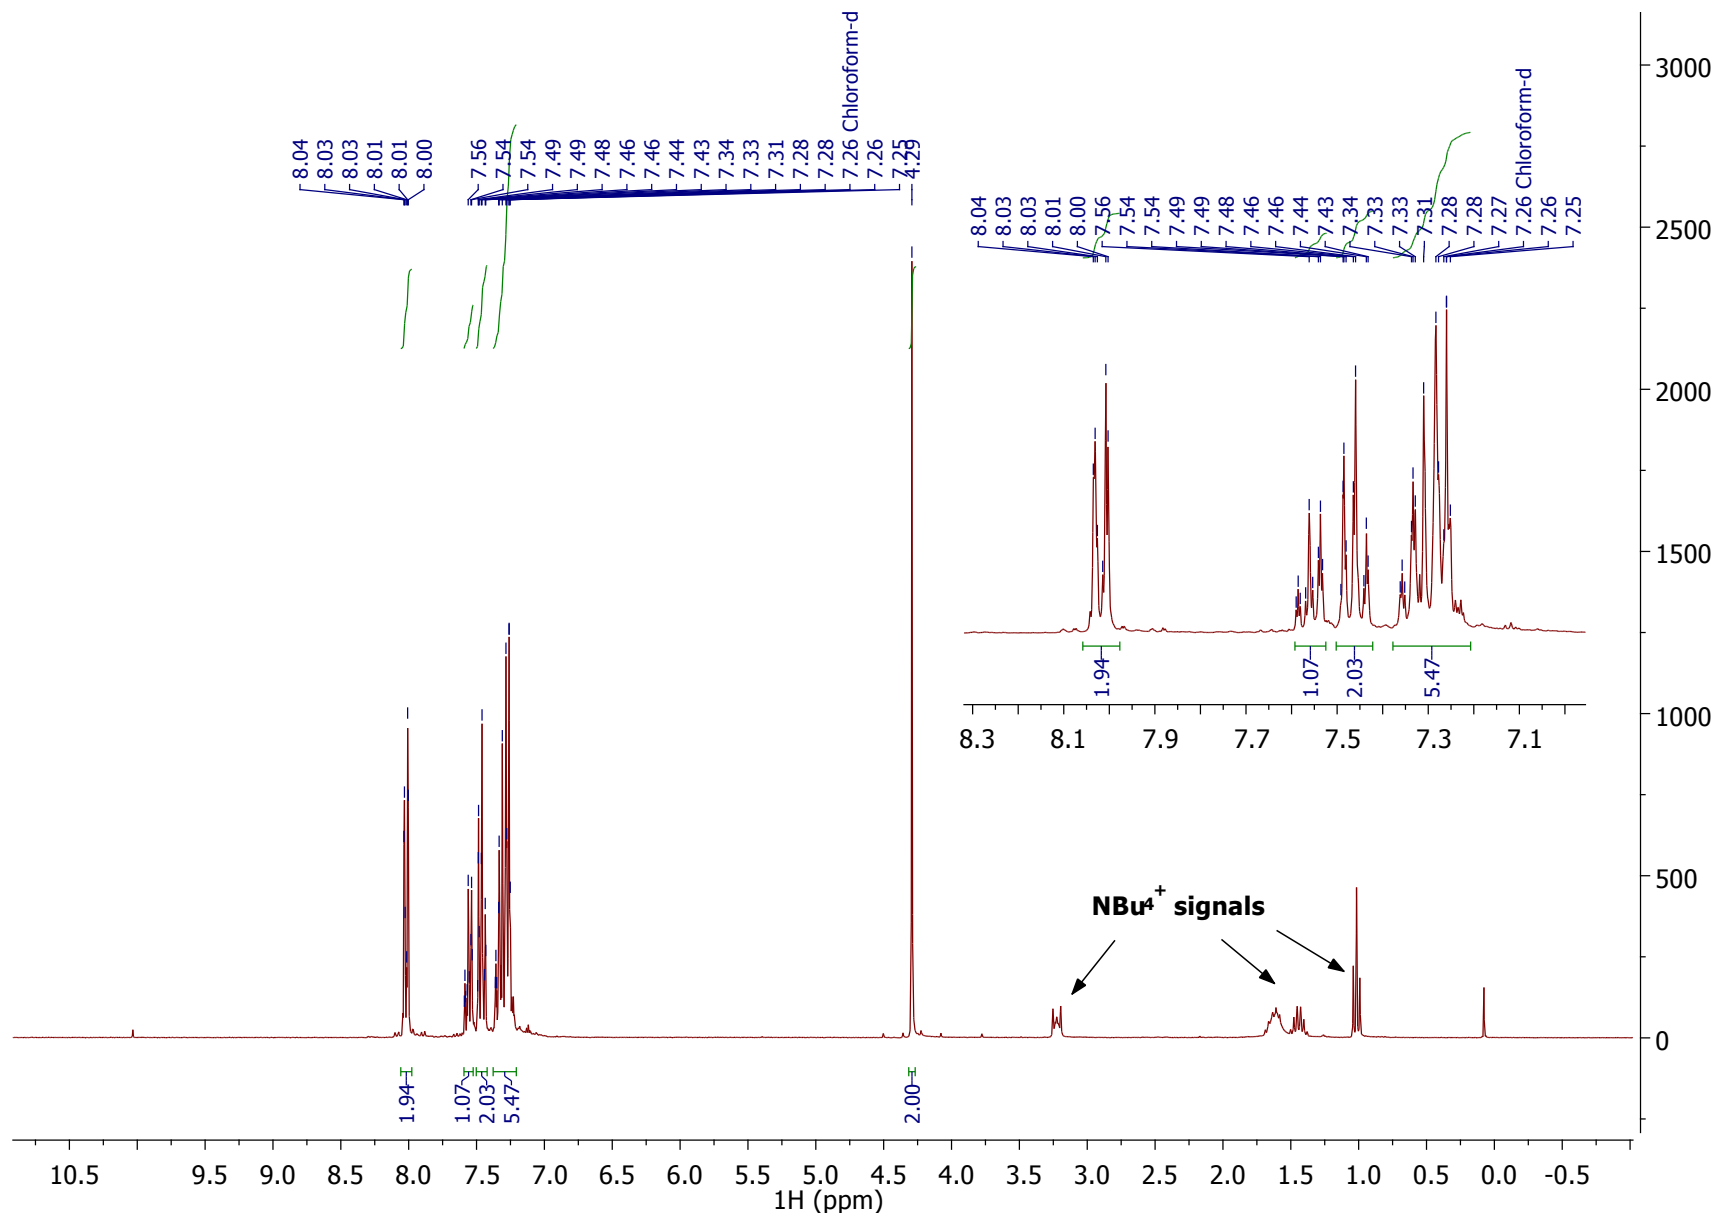

## References

1 M. Gatto, A. Del Zotto, J. Segato and D. Zuccaccia, *Organometallics*, 2018, **37**, 4685–4691.
